# Supplementary material for: Variation in COVID-19 characteristics, treatment and outcomes in Michigan: an observational study in 32 hospitals
Source: PubMed Central journal article supplement — BMJ Open. 2021 Jul 23;11(7):e044921. doi: 10.1136/bmjopen-2020-044921 (PMC8313307; doi:10.1136/bmjopen-2020-044921), 2021-07-23
Supplement: bmjopen-2020-044921.draft_revisions.pdf [file bmjopen-2020-044921.draft_revisions.pdf]

# BMJ Open

BMJ Open is committed to open peer review. As part of this commitment we make the peer review history of every article we publish publicly available.

When an article is published we post the peer reviewers' comments and the authors' responses online. We also post the versions of the paper that were used during peer review. These are the versions that the peer review comments apply to.

The versions of the paper that follow are the versions that were submitted during the peer review process. They are not the versions of record or the final published versions. They should not be cited or distributed as the published version of this manuscript.

BMJ Open is an open access journal and the full, final, typeset and author-corrected version of record of the manuscript is available on our site with no access controls, subscription charges or pay-per-view fees (<http://bmjopen.bmj.com>).

If you have any questions on BMJ Open's open peer review process please email [info.bmjopen@bmj.com](mailto:info.bmjopen@bmj.com)

# BMJ Open

## Variation in COVID-19 Characteristics, Treatment, and Outcomes in Michigan

|                               |                                                                                                                                                                                                                                                                                                                                                                                                                                                                                                                                                                                                                                                                                                                        |
|-------------------------------|------------------------------------------------------------------------------------------------------------------------------------------------------------------------------------------------------------------------------------------------------------------------------------------------------------------------------------------------------------------------------------------------------------------------------------------------------------------------------------------------------------------------------------------------------------------------------------------------------------------------------------------------------------------------------------------------------------------------|
| Journal:                      | <i>BMJ Open</i>                                                                                                                                                                                                                                                                                                                                                                                                                                                                                                                                                                                                                                                                                                        |
| Manuscript ID                 | bmjopen-2020-044921                                                                                                                                                                                                                                                                                                                                                                                                                                                                                                                                                                                                                                                                                                    |
| Article Type:                 | Original research                                                                                                                                                                                                                                                                                                                                                                                                                                                                                                                                                                                                                                                                                                      |
| Date Submitted by the Author: | 21-Sep-2020                                                                                                                                                                                                                                                                                                                                                                                                                                                                                                                                                                                                                                                                                                            |
| Complete List of Authors:     | Chopra, Vineet; University of Michigan Michigan Medicine, General Internal Medicine<br>Flanders, Scott A.; University of Michigan,<br>Vaughn, Valerie ; University of Michigan,<br>Petty, Lindsay; University of Michigan Medical School, Division of Infectious Diseases<br>Gandhi, Tejal; University of Michigan Michigan Medicine<br>McSparron, Jakob; University of Michigan Health System<br>Malani, Anurag; St Joseph Mercy Health System<br>O'Malley, Megan; University of Michigan Michigan Medicine<br>Kim, Tae; University of Michigan Michigan Medicine<br>McLaughlin, Elizabeth; University of Michigan Michigan Medicine<br>Prescott, Hallie; University of Michigan Michigan Medicine, Internal Medicine |
| Keywords:                     | COVID-19, Quality in health care < HEALTH SERVICES ADMINISTRATION & MANAGEMENT, Protocols & guidelines < HEALTH SERVICES ADMINISTRATION & MANAGEMENT                                                                                                                                                                                                                                                                                                                                                                                                                                                                                                                                                                   |
|                               |                                                                                                                                                                                                                                                                                                                                                                                                                                                                                                                                                                                                                                                                                                                        |

SCHOLARONE™  
Manuscripts

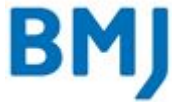

I, the Submitting Author has the right to grant and does grant on behalf of all authors of the Work (as defined in the below author licence), an exclusive licence and/or a non-exclusive licence for contributions from authors who are: i) UK Crown employees; ii) where BMJ has agreed a CC-BY licence shall apply, and/or iii) in accordance with the terms applicable for US Federal Government officers or employees acting as part of their official duties; on a worldwide, perpetual, irrevocable, royalty-free basis to BMJ Publishing Group Ltd ("BMJ") its licensees and where the relevant Journal is co-owned by BMJ to the co-owners of the Journal, to publish the Work in this journal and any other BMJ products and to exploit all rights, as set out in our [licence](#).

The Submitting Author accepts and understands that any supply made under these terms is made by BMJ to the Submitting Author unless you are acting as an employee on behalf of your employer or a postgraduate student of an affiliated institution which is paying any applicable article publishing charge ("APC") for Open Access articles. Where the Submitting Author wishes to make the Work available on an Open Access basis (and intends to pay the relevant APC), the terms of reuse of such Open Access shall be governed by a Creative Commons licence – details of these licences and which [Creative Commons](#) licence will apply to this Work are set out in our licence referred to above.

Other than as permitted in any relevant BMJ Author's Self Archiving Policies, I confirm this Work has not been accepted for publication elsewhere, is not being considered for publication elsewhere and does not duplicate material already published. I confirm all authors consent to publication of this Work and authorise the granting of this licence.

## Variation in COVID-19 Characteristics, Treatment, and Outcomes in Michigan

Vineet Chopra MD, MSc (a,b)

Scott A. Flanders MD (a,b)

Valerie M. Vaughn MD, MSc (a,b)

Lindsay A. Petty MD (c,b)

Tejal Gandhi, MD (c,b)

Jakob I. McSparron MD (b,d)

Anurag N. Malani MD (e,b)

Megan O'Malley, PhD (a,b)

Tae Kim, MHSA (f,g)

Elizabeth McLaughlin MS, RN (a,b)

Hallie C. Prescott MD, MSc (d,b)

From: (a) The Division of Hospital Medicine, Department of Medicine, University of Michigan Health System, Ann Arbor, MI, USA; (b) The Michigan Hospital Medicine Safety Collaborative, Ann Arbor, MI, USA; (c) Division of Infectious Diseases, Department of Internal Medicine, University of Michigan Health System, Ann Arbor, MI, USA; (d) Division of Pulmonary and Critical Care Medicine, Department of Medicine, University of Michigan Health System, Ann Arbor, Michigan, USA; (e) Division of Infectious Diseases, Department of Internal Medicine, St. Joseph Mercy Health System, Ann Arbor, MI, USA; (f) Michigan Arthroplasty Registry Collaborative Quality Initiative and (g) Department of Orthopaedic Surgery, University of Michigan Health System, Ann

1  
2  
3 Arbor, MI, USA.  
4  
5  
6  
7

8 **Abstract Word Count: 256**  
9

10 **Word Count: 3005**  
11

12 **Conflicts of Interest: No relevant conflicts disclosed by coauthors.**  
13  
14

15  
16  
17 **Primary Funding Source:** Blue Cross Blue Shield of Michigan (BCBSM) and Blue  
18  
19 Care Network as part of the BCBSM Value Partnerships program.  
20  
21

22  
23  
24 **Address for Correspondence:**  
25

26 Vineet Chopra MD, MSc  
27

28 2800 Plymouth Road, Building 16, #432 W  
29

30 Ann Arbor, MI 48109  
31

32 [vineetc@umich.edu](mailto:vineetc@umich.edu)  
33  
34

35 Phone - (734) 615-8341  
36

37 Fax - (734) 936-8944  
38  
39

40 **Keywords:**  
41

42 Covid-19; Quality in Health care; Protocols and Guidelines  
43  
44  
45  
46  
47  
48  
49  
50  
51  
52  
53  
54  
55  
56  
57  
58  
59  
60

### **Additional Contributions & Acknowledgements:**

The authors thank Qisu (Sue) Zhang, MPH, Tawny Czilok, RN, MHI, Liz Vasher, RN, Jessica Southwell, RN, MSN, Danny Nielsen, MS, and Jennifer Horowitz, MA for help with data analytics and project management.

We also thank all the BCBSM Collaborative Quality Initiatives (CQI's) that partnered together on data collection and offered project management/analytics support. Lastly, we are grateful to all of the hospitals who volunteered to be part of MiCOVID-19 including: Beaumont-Dearborn, Beaumont-Grosse Pointe, Beaumont- Farmington Hills, Beaumont- Royal Oak, Beaumont- Taylor, Beaumont- Trenton, Beaumont- Troy, Beaumont- Wayne, Bronson Battle Creek, Bronson Methodist, Detroit Medical Center- Detroit Receiving, Detroit Medical Center-Harper Hutzell, Detroit Medical Center-Detroit-Huron Valley Sinai, Henry Ford, Henry Ford Allegiance, Henry Ford Macomb, Henry Ford West Bloomfield, Henry Ford West Wyandotte, Holland Hospital, Hurley Medical Center, Lakeland Hospital, McLaren Flint, McLaren Greater Lansing, McLaren Port Huron, Mercy Health Muskegon, Mercy Health St. Mary's, Metro Health, Michigan Medicine, MidMichigan Alpena, MidMichigan Gratiot, MidMichigan Midland, Munson Medical Center, Oaklawn Hospital, Sinai Grace, Sparrow, St. Joseph Mercy Ann Arbor, St. Joseph Mercy Chelsea, St. Joseph Mercy Livingston, St. Joseph Mercy Oakland, St. Mary Mercy Livonia.

## ABSTRACT

### OBJECTIVE

To describe patient characteristics, symptoms, patterns of care and outcomes for COVID-19 patients across Michigan.

### DESIGN

Multi-center retrospective cohort study.

### SETTING AND PARTICIPANTS

Patients discharged (March 16 to May 11, 2020) with suspected or confirmed COVID-19 infection from 32 Michigan hospitals were identified. Trained abstractors collected demographic information on all patients, and detailed clinical data on a subset of COVID-19 positive patients.

### MEASUREMENTS

Patient characteristics, treatment, and outcomes including cardiopulmonary resuscitation, mortality, and venous thromboembolism within and across hospitals.

### RESULTS

Among 1,024 cases with detailed data, median age was 63 years, median BMI 30.6, and 51.4% were black. Cough, fever, and shortness of breath were the top symptoms. 37.2% reported a known COVID-19 contact, 7.0% were healthcare workers, and 16.1% presented from congregated living facilities.

1  
2  
3 During hospitalization, 232 (22.7%) patients were treated in an ICU, 558 (54.9%)  
4 in a “cohorted” unit, 161 (15.7%) received mechanical ventilation, and 90 (8.8%)  
5 received high-flow nasal cannula. ICU patients more often received hydroxychloroquine  
6 (66% vs. 46%), corticosteroids (34% vs 18%), and antibiotic therapy (92% vs 71%) than  
7 general ward patients ( $p < 0.05$  for all). Overall, 219 (21.4%) patients died, with in-  
8 hospital mortality ranging from 7.9% to 45.7% across hospitals. 73% received at least  
9 one COVID-19-specific treatment, ranging from 32% to 96% across sites.  
10  
11  
12  
13  
14  
15  
16  
17  
18  
19  
20

## 21 **LIMITATIONS**

22 Rationales for management decisions could not be determined; findings may be  
23 biased by patients who remain hospitalized; implications of variability of clinical care on  
24 outcomes is unknown.  
25  
26  
27  
28  
29  
30  
31  
32

## 33 **CONCLUSIONS**

34 During the Michigan outbreak of COVID-19, patient characteristics, treatment,  
35 and outcomes varied widely within and across hospitals.  
36  
37  
38  
39  
40  
41  
42  
43  
44  
45  
46  
47  
48  
49  
50  
51  
52  
53  
54  
55  
56  
57  
58  
59  
60



## Article Summary

### Strengths and Limitations of this Study

- Ours is the first multi-hospital study to examine clinical aspects related to COVID-19 in Michigan. Through a rigorous data collection structure including a well-defined sampling strategy and trained data abstractors, we provide novel and detailed insights into clinical care during the pandemic.
- We were able to examine variation across sites finding substantial differences in clinical care and outcomes across hospitals. To our knowledge, this is the first study to examine differences in these important care processes, treatment approaches and outcomes across sites.
- We report a high rate of use of non-evidence-based therapies for treating COVID-19. This finding has significant safety, economic and policy implications for the most critically ill subsets in the hospital.
- Given the observational nature of the study, rationales for treatment or management decisions cannot be determined. Our study depends on available documentation, so symptoms, comorbidities, or treatments not documented in the medical record may be omitted.
- Because our sampling frame included patients that were discharged or deceased, our findings may be biased as patients who remain hospitalized may not be included in our cohort (potentially explaining lower duration of mechanical ventilation and hospital stay). However, COVID-19 hospitalizations in Southeastern Michigan have been declining since mid-April—limiting the degree of bias from exclusion of patients still in the hospital.

## INTRODUCTION

Since detection in Wuhan, China,<sup>1 2</sup> over 4.5 million cases of COVID-19, caused by severe acute respiratory syndrome coronavirus-2 (SARS-CoV-2) have been reported.<sup>3</sup> The United States (US) leads the world in the total number of cases, with over 1.5 million cases and 92,000 deaths reported as of May 20, 2020.<sup>4</sup> Within the US, Michigan remains one of the hardest hit states, with over 52,000 cases and 5,000 deaths as of May 20, 2020.<sup>5</sup>

Michigan has a long history of collaborative quality improvement work that spans several disciplines including cardiovascular medicine, emergency medicine and hospital medicine, among others.<sup>6</sup> These consortia collect detailed clinical variables from hospitals to populate a central registry, allowing benchmarking and comparisons of care and outcomes. As the COVID-19 pandemic unfolded in Southeast Michigan, several consortia came together to focus data collection on patients hospitalized with COVID-19. We describe clinical and epidemiologic findings from Michigan hospitals made possible through these efforts.

## METHODS

A retrospective cohort design was used. Data were collected from medical records of patients discharged between March 16, 2020 and May 11, 2020 from one of 32 Michigan hospitals who participate in collaborative quality initiatives sponsored by Blue Cross Blue Shield of Michigan and Blue Care Network. Trained abstractors at each hospital identified adult patients  $\geq 18$  years of age that underwent testing for COVID-19 via reverse-transcriptase polymerase chain reaction, including both positive cases and

1  
2  
3 persons under investigation (PUI) who eventually had a negative test. Demographic  
4 data (age, gender, race, ethnicity, payor) and in-hospital mortality were collected for all  
5 confirmed and PUI cases. A sample of COVID-19 positive cases from each hospital was  
6 selected for detailed abstraction. Positive cases were sorted by day of admission (e.g.,  
7 Mon-Sun) and, for each day, a pseudo-random number (minute of hospital discharge)  
8 was used to select patients for detailed abstraction. Patients who were pregnant,  
9 transitioned to hospice within 3 hours of hospital admission, or discharged against  
10 medical advice were excluded. All data were entered into a registry (Mi-COVID19) using  
11 a structured data collection template.  
12  
13  
14  
15  
16  
17  
18  
19  
20  
21  
22  
23

24 Patient characteristics including comorbidities, home medications, presenting  
25 symptoms and risk factors for COVID-19 (e.g., exposure to sick contacts, healthcare  
26 worker) were collected. Clinical data during hospitalization including location of care  
27 (ward vs. intensive care unit [ICU], a “cohorted” COVID-19 only unit), vital signs, body  
28 mass index (BMI), laboratory and radiology findings and therapeutics were abstracted.  
29 Organ supports such as mechanical ventilation and other respiratory support,  
30 vasopressor use, renal replacement therapy (continuous renal replacement therapy  
31 [CRRT] and intermittent hemodialysis [iHD]) were also collected.  
32  
33  
34  
35  
36  
37  
38  
39  
40  
41

42 The primary outcomes of interest included hospital mortality, receipt of  
43 cardiopulmonary resuscitation (CPR), and occurrence of deep vein thrombosis (DVT) or  
44 pulmonary embolism (PE) (based on positive imaging findings or initiation of empiric  
45 therapy for presumed thrombosis). In addition, we performed pre-specified exploratory  
46 analyses in hospitals with at least 25 detailed abstractions (n=14 hospitals) to examine  
47 variation in patient characteristics, management and outcomes. Specifically, we  
48  
49  
50  
51  
52  
53  
54  
55  
56  
57  
58  
59  
60

1  
2  
3 assessed variation in use of COVID-19 specific treatments (defined as  
4 hydroxychloroquine, combination hydroxychloroquine plus azithromycin, Vitamin C [oral  
5 or intravenous], IL-6 inhibitors or remdesivir), antibiotic therapy, use of organ support  
6 (e.g., use of vasopressors, mechanical ventilation and CPR), occurrence of venous  
7 thrombosis and in-hospital mortality.  
8  
9

10  
11  
12 Descriptive statistics (e.g., mean, median, proportion) with measures of  
13 dispersion (e.g., standard error, inter-quartile range [IQR]) were used to summarize  
14 data. Data that were not documented in medical records (e.g., values of certain  
15 laboratory tests) were reported as missing. Pairwise comparisons were made using t-  
16 tests for continuous data and chi-square tests for categorical data, respectively.  
17  
18 Differences across hospitals were tested using the Kruskal–Wallis test for continuous  
19 variables and Pearson chi-square test for categorical variables. All statistical tests were  
20 two-sided with  $p < 0.05$  considered statistically significant. The study was reviewed by the  
21 Institutional Review Board and deemed “not regulated”. It was not appropriate or  
22 possible to involve patients or the public in the design, or conduct, or reporting, or  
23 dissemination plans of our research.  
24  
25  
26  
27  
28  
29  
30  
31  
32  
33  
34  
35  
36  
37  
38  
39  
40  
41

## 42 **RESULTS**

### 43 **DEMOGRAPHIC DATA**

44  
45 Demographic-only data from 1,593 COVID-19 positive and 1,259 PUI discharges  
46 from 32 Michigan hospitals were collected. PUIs had a median age of 64.4 years,  
47 52.6% were male and 32.0% Black. COVID-19 positive patients had similar age and  
48 gender as PUIs (63.9 years, and 52.1% male, respectively), but were more commonly  
49  
50  
51  
52  
53  
54  
55  
56  
57  
58  
59  
60

1  
2  
3 Black (57.1% vs. 32.0%,  $p<0.01$ ). In the demographic-only cohort, 398 (25.0%) COVID-  
4  
5 19 positive patients died during hospitalization.  
6

7  
8 Detailed data were abstracted on 1,024 (64.3%) randomly-selected COVID-19  
9  
10 positive patients. The most prevalent comorbidities were hypertension (65.4%),  
11  
12 diabetes (36.8%), cardiovascular disease (26.0%) and chronic kidney disease (23.3%);  
13  
14 14.9% of patients had no comorbidities. Though 12.8% of patients had a diagnosis of  
15  
16 asthma and 11.2% had a diagnosis of chronic obstructive pulmonary disease, pre-  
17  
18 hospital use of inhaled steroids, long-acting beta-agonists and long-acting  
19  
20 antimuscarinic agents was low at 4.2%, 2.9%, and 0.5%, respectively. Current smoking  
21  
22 or vaping was uncommon, but 27.3% were former smokers, and 35.8% reported former  
23  
24 vaping. 115 (11.3%) patients were on immunosuppressive medications prior to  
25  
26 hospitalization, including 62 (6.1%) who were on oral steroids. Essential workers  
27  
28 comprised 12.8% of the cohort, including healthcare workers (7.0%) and service  
29  
30 workers (5.8%, e.g., postal, food service, transportation). Prior to admission, 16.1% of  
31  
32 patients resided in congregated living facilities, including nursing homes and homeless  
33  
34 shelters (Table 1).  
35  
36  
37  
38  
39  
40  
41

## 42 **CLINICAL PRESENTATION AND INITIAL EVALUATION**

43  
44 In the detailed abstraction cohort ( $n=1,024$ ), median duration of symptoms prior  
45  
46 to hospitalization was 6 days (IQR 3-9). The most common presenting symptoms were  
47  
48 cough (73.3%), fever (71.8%), and shortness of breath (72.2%); only 8% of patients did  
49  
50 not report one of these 3 complaints (Table 1). Gastrointestinal symptoms including  
51  
52 nausea, vomiting and diarrhea occurred in 39.4% of patients. Over a third of patients  
53  
54  
55  
56  
57  
58  
59

1  
2  
3 (37.2%) reported sick contacts at the time of admission, and 23.8% reported contact  
4 with a patient known to have COVID-19. The location of diagnostic testing for COVID-19  
5 varied: 67.5% of patients were tested in hospital laboratories, 23.2% in commercial  
6 laboratories, and 8.0% in the state laboratory. Patients were most commonly admitted  
7 to a general medical/surgical ward (59.5%), but 15.7% were admitted to intermediate  
8 care, 13.5% were admitted directly to ICU, and 11.3% were admitted to an observation  
9 unit (**Figure 1**). A total of 419 (40.9%) of patients were admitted to a “cohorted”  
10 (COVID-19 only) unit. At admission, 6.3% of patients had do not resuscitate/do not  
11 intubate orders, which increased to 13.8% by discharge.

12  
13  
14  
15  
16  
17  
18  
19  
20  
21  
22  
23  
24  
25  
26  
27  
28  
29  
30  
31  
32  
33  
34  
35  
36  
37  
38  
39  
40  
41  
42  
43  
44  
45  
46  
47  
48  
49  
50  
51  
52  
53  
54  
55  
56  
57  
58  
59  
60  
Common laboratory testing on admission included white blood cell count (93.7%), absolute lymphocyte count (75.8%), troponin (57.4%), lactate (57.2%), CRP (44.9%) and procalcitonin (42.4%) (missingness by laboratory test are reported in the e-Appendix). Among those with available laboratory data, patients who received ICU treatment had higher levels of inflammatory markers at admission including d-dimer (2.88mg/L vs. 1.65mg/L), ferritin (872ng/mL vs. 559ng/mL), CRP (24.3mg/dL vs. 13.8mg/dL) and LDH (476U/L vs. 346U/L) (**Table 2**). Chest imaging (X-ray or CT) was performed in 528 (51.6%) patients within 1 day of admission and was more common in ICU than general care patients (59.9% vs 49.1%,  $p=0.004$ ). ICU patients were more likely to have radiographic abnormalities on presentation. Viral respiratory panels, blood cultures and sputum cultures were collected in 722 (51.0%) patients, but were positive in only 48 (4.7%) patients; 9.5% of ICU patients vs. 3.3% of general care patients had a viral or bacterial pathogen identified ( $p<0.001$ ).

## CRITICAL CARE TREATMENT

Overall, 232 patients (22.7%) were treated in an ICU, including 138 (13.5%) who were admitted directly to an ICU, and 94 (9.2%) who were transferred to ICU a median of 2 days following admission. Median length of ICU stay was 6 days (IQR 3-9), which was similar in survivors vs. non-survivors (5 vs 6 days,  $p=0.790$ ). Among 1,024 patients with detailed abstraction, the maximum respiratory support received was invasive mechanical ventilation in 161 patients (15.7%), non-invasive positive pressure ventilation in 15 (1.5%), heated high-flow nasal cannula in 60 (5.9%), oxygen mask ( $>40\%$   $FiO_2$  or  $>6L/min$ ) in 88 (8.6%), and nasal cannula oxygen (1-6L/min) in 441 (43.1%) (**Table 3**). 259 (25.3%) patients received no respiratory support or oxygen therapy during hospitalization. Among 78 patients initiated on HHFNC, 13 (16.7%) progressed to invasive mechanical ventilation. Among 25 patients initiated on NIPPV, 10 (40.0%) progressed to invasive mechanical ventilation. An additional 12 patients and 2 patients, respectively, used HHFNC and NIPPV after extubation.

Upon initiation of mechanical ventilation, patients were predominantly treated with a volume control mode (75%), with high  $FIO_2$  ( $\geq 80\%$  in 49.1% of ventilated patients), and modest tidal volumes (median tidal volume 7.0 ml/kg predicted body weight, [IQR 6.2-8.0]). The median duration of mechanical ventilation was 6 days (IQR 3-8 days). Prone positioning was documented in 18 patients, pulmonary vasodilators in 2 patients, and extra corporeal membrane oxygenation in 2 patients. CPR was administered to 41 patients (4.0%), with only one patient surviving to hospital discharge.

Vasopressors were used in 141 patients (13.8%), dialysis in 53 (5.2%), and corticosteroids in 222 (21.7%) patients. 771 (75.3%) patients received broad-spectrum

1  
2  
3 antibiotics, with use being more common in the ICU than general wards (91.8% vs  
4  
5 70.5%,  $p<0.001$ ).  
6  
7

## 10 COVID-19 SPECIFIC THERAPIES

11  
12 A total of 747 (72.9%) patients were treated with therapies targeting COVID-19,  
13  
14 or the body's response to COVID-19, most commonly hydroxychloroquine (51%),  
15  
16 hydroxychloroquine plus azithromycin (36%), and Vitamin C (10%). Treatment with IL-6  
17  
18 inhibitors and remdesivir was infrequent (27 and 17 patients, respectively). Use of  
19  
20 COVID-19 treatments was more common in ICU than general care patients (88% vs.  
21  
22 69%,  $p<0.001$ ). No patients in our sample received convalescent plasma. The  
23  
24 proportion of patients treated with COVID-19 specific therapies decreased over time  
25  
26 from 78.1% of patients admitted during March 8 to March 31 to 65.0% of patients  
27  
28 admitted during April 1 to May 11 ( $p<0.001$ ). Only 21 (2.0%) patients were enrolled into  
29  
30 a clinical trial (**Table 2**).  
31  
32  
33  
34  
35  
36  
37

## 38 CLINICAL OUTCOMES

39  
40 The in-hospital mortality rate for the full cohort of COVID-19 positive patients  
41  
42 (demographic plus detailed abstractions) was 25.0%. Mortality varied by decade of age,  
43  
44 ranging from 4.5% among patients aged 30-39 to 37.5% in patients aged 70-79 years  
45  
46 (**Figure 2**). Among 219 decedents with detailed abstraction, 134 (61.5%) died following  
47  
48 ICU treatment and 114 (52.1%) died after receiving mechanical ventilation. 40 of 219  
49  
50 decedents (18.3%) received cardiopulmonary resuscitation, and 91 (41.6%) were  
51  
52 transitioned to comfort care prior to death. The most common causes of death were  
53  
54  
55  
56  
57  
58  
59  
60



1  
2  
3 refractory hypoxemia (29.4%), cardiac arrhythmia (15.9%) and refractory shock  
4 (10.7%). Venous thromboembolism occurred in 32 (3.1%) of patients, of which 9  
5  
6 experienced proximal lower-extremity DVT, 21 experienced PE, and 2 experienced both  
7  
8 DVT and PE.  
9  
10

11  
12 Among the 805 patients that survived to hospital discharge, 86% were  
13  
14 discharged home and 8% were discharged to a skilled nursing facility or rehabilitation  
15  
16 center. Only 1 patient (0.1%) was discharged to the Detroit field hospital (**Table 3**).  
17  
18  
19  
20

## 21 **VARIATION ACROSS HOSPITALS**

22  
23 Among 14 hospitals with at least 25 detailed abstractions, substantial variation in  
24  
25 demographics, illness severity, care processes, treatments, and outcomes of COVID-19  
26  
27 positive patients were observed (**Table 4**). The proportion of patients over 65 years of  
28  
29 age ranged from 30.2% to 65.5%, while the proportion of Black patients ranged from 0%  
30  
31 to 94.6%. Similarly, the proportion of patients admitted directly to an ICU ranged from  
32  
33 0% to 43.8%, while the proportion of patients who were transferred to an ICU after  
34  
35 admission ranged from 0% to 24.1%. Treatment in “cohorted” units ranged from 0% to  
36  
37 100%. Mechanical ventilation on admission ranged from 0% to 12.8% while use of  
38  
39 vasopressors on admission ranged from 0% to 14.8% across hospitals. Critical illness  
40  
41 on presentation (defined as admission to an ICU with receipt of vasopressors or  
42  
43 mechanical ventilation on admission) varied from 0% to 7.7%.  
44  
45  
46  
47  
48

49  
50 72.9% of patients received at least one COVID-19 specific therapy (e.g.,  
51  
52 hydroxychloroquine, hydroxychloroquine plus azithromycin, interleukin-6 inhibitor,  
53  
54 antiviral therapy), but use varied from 32% to 96.3% across sites. Similarly, 65% of  
55  
56  
57  
58  
59

1  
2  
3 patients received concurrent antibiotics and COVID-19 specific treatment during  
4 hospitalization, with frequency varying from 50% to 100% in ICU patients vs. 17% to  
5  
6 95% in general care patients.  
7  
8

9  
10 Mortality across hospitals varied from 7.9% to 45.7% of patients, and rates of  
11 CPR before death ranged from 0% to 66.7%. Finally, rates of VTE also varied, occurring  
12 in 0 to 11% of patients across hospitals.  
13  
14  
15

## 16 17 18 19 **DISCUSSION**

20  
21 While reports of COVID-19 patients from New York, Washington, and California  
22 exist,<sup>7-9</sup> this is the first multi-center study to examine epidemiology, treatment and  
23 outcomes of COVID-19 hospitalizations in Michigan. Also, in contrast to prior multi-  
24 hospital US cohorts, the Mi-COVID19 registry includes a large sample of patients  
25 treated at a diverse set of 32 academic and community hospitals.  
26  
27  
28  
29  
30  
31

32  
33 The demographics of our cohort differ from other cohorts. First, patients with  
34 confirmed COVID-19 in Michigan are disproportionately Black (over half of our cohort).  
35 This is in contrast to 32% of PUIs—indicating that the predominance of black patients  
36 with COVID-19 is not a reflection of local demographics, but rather disproportionate  
37 impact of COVID-19 on black patients. Second, in contrast to prior studies,<sup>1 7 10</sup> our  
38 cohort was nearly 50:50 male:female, rather than male dominant. The reasons for this  
39 difference are unclear.  
40  
41  
42  
43  
44  
45  
46  
47  
48

49 Consistent with prior reports, the main presenting symptoms were cough,  
50 dyspnea and fever. Similar to other studies,<sup>11</sup> a substantial proportion of patients had  
51 multiple comorbidities; but notably, 15% of our cohort had no known medical  
52  
53  
54  
55  
56  
57  
58  
59  
60

1  
2  
3 problems.<sup>12</sup> We found that a substantial proportion of patients reported contact with a  
4 known COVID-19 positive patient prior to developing symptoms. These findings mirror  
5 those of a study from Shenzhen, China, where contacts of those with disease  
6 experienced a significantly higher rate of infection than the general public.<sup>13</sup> Additionally,  
7 patients underwent COVID-19 testing through a number of venues including hospital,  
8 commercial and state-run laboratories, illustrating the myriad ways in which diagnosis  
9 was obtained early in the outbreak when testing was limited.<sup>14</sup> Although only 14% of the  
10 sample was admitted directly to an ICU, an additional 9% were transferred to an ICU  
11 later in hospitalization. Hospital mortality in cases with detailed abstractions was 21%,  
12 but increased with age, consistent with prior studies.<sup>15</sup>  
13  
14  
15  
16  
17  
18  
19  
20  
21  
22  
23  
24  
25

26 A key finding of our study is that a majority of patients hospitalized for COVID-19  
27 were treated with therapies intended to mitigate SARS-CoV-2 viral replication or the  
28 body's immune response. More than half of patients were treated with  
29 hydroxychloroquine, and an additional 6% were treated with antivirals or immune  
30 modulating agents. Experts have increasingly questioned the use of unproven COVID-  
31 19 therapies outside of a clinical trial,<sup>16</sup> and have argued that supportive care and trial  
32 enrollment are the best options until data regarding efficacy of therapies accrues.<sup>17 18</sup>  
33 Accumulating observational and trial data now suggest no benefit from  
34 hydroxychloroquine,<sup>19-21</sup> and concerns regarding harm from empiric use remain.<sup>22</sup>  
35 Unfortunately, only 2% of our sample was enrolled in clinical trials. The high rate of  
36 experimental COVID-19 therapies outside empiric studies represents a lost opportunity  
37 for learning. It is also emblematic of the strong desire—particularly early in the  
38 pandemic—to use therapies with a theoretical potential to target the virus even though  
39  
40  
41  
42  
43  
44  
45  
46  
47  
48  
49  
50  
51  
52  
53  
54  
55  
56  
57  
58  
59  
60

1  
2  
3 improved survival from critical illness is largely attributed to improvements in supportive  
4 care.<sup>23</sup> Notably, we still do not have targeted therapies for sepsis or acute respiratory  
5 distress syndrome, which are the major mechanisms by which patients die from COVID-  
6  
7  
8  
9  
10 19 infection.

11  
12 Another strength of our study is the variation in clinical presentation and  
13 outcomes we observed across a heterogeneous sample of hospitals. Use of COVID-19  
14 specific treatments, corticosteroids, and antibiotics varied markedly across hospitals.  
15  
16 While we are unable to ascertain reasons for such variation, we anecdotally observed  
17 that practice evolved across hospitals over time. For example, at some Michigan  
18 hospitals, routine use of hydroxychloroquine was common in the first few weeks of the  
19 pandemic but curbed as trial data became available. In contrast, use of  
20 hydroxychloroquine continues to be encouraged at other hospitals even today.<sup>24</sup> While it  
21 is unclear if these practice changes influenced outcomes, future studies exploring the  
22 rationale and impact of these changes on patients will be valuable.  
23  
24  
25  
26  
27  
28  
29  
30  
31  
32  
33  
34

35 Our study has limitations. First, given the observational nature of the study,  
36 rationales for treatment or management decisions cannot be determined. Second,  
37 because our sampling frame included patients that were discharged or deceased, our  
38 findings may be biased as patients who remain hospitalized may not be included in our  
39 cohort (potentially explaining lower duration of mechanical ventilation and hospital stay).  
40 However, COVID-19 hospitalizations in Southeastern Michigan have been declining  
41 since mid-April—limiting the degree of bias from exclusion of patients still in the  
42 hospital. Third, while variation in care was observed, the implications of such variability  
43 on clinical outcomes is unknown. Nevertheless, given that therapeutic modalities are  
44  
45  
46  
47  
48  
49  
50  
51  
52  
53  
54  
55  
56  
57  
58  
59  
60

1  
2  
3 scarce and not without risks, reducing variation may improve patient safety and  
4 resource use. Fourth, our study depends on available documentation, so symptoms,  
5 comorbidities, or treatments not documented in the medical record may be omitted. For  
6 example, it is possible that the low use of prone positioning observed in our cohort may  
7 be due to incomplete documentation of this practice. Finally, we did not collect patient  
8 identifiers, so inter-hospital transfers could be reported as two separate hospitalizations.  
9 However, we did collect admission and discharge locations, and only 6% of the cohort  
10 was transferred from another hospital.  
11  
12  
13  
14  
15  
16  
17  
18  
19  
20

21 Our study also has strengths. Ours is the first multi-hospital study to examine  
22 clinical aspects related to COVID-19 in Michigan. Through a rigorous data collection  
23 structure including a well-defined sampling strategy and trained data abstractors, we  
24 provide novel and detailed insights into clinical care during the pandemic. Second, we  
25 were able to examine variation across sites finding substantial differences in clinical  
26 care and outcomes across hospitals. To our knowledge, this is the first study to examine  
27 differences in these important care processes, treatment approaches and outcomes  
28 across sites. Third, we report a high rate of use of non-evidence-based therapies for  
29 treating COVID-19. This finding has significant safety, economic and policy implications  
30 for the most critically ill subsets in the hospital. Finally, data collection for this effort  
31 remains ongoing, including longitudinal monitoring of patients after discharge. These  
32 data will help shed new light on the post hospital sequelae of COVID-19.  
33  
34  
35  
36  
37  
38  
39  
40  
41  
42  
43  
44  
45  
46  
47  
48

49 Michigan remains one of the regions most affected by COVID-19. This multi-  
50 center study provides granular clinical data regarding patients, care practices and  
51 clinical outcomes in the state. The wide variation in observed practices and outcomes  
52  
53  
54  
55  
56  
57  
58  
59  
60

1  
2  
3 suggests caution when interpreting findings from single center studies. Our study also  
4  
5 demonstrates the value of hospital collaboratives to help inform best practices.  
6  
7  
8  
9  
10  
11  
12  
13  
14  
15  
16  
17  
18  
19  
20  
21  
22  
23  
24  
25  
26  
27  
28  
29  
30  
31  
32  
33  
34  
35  
36  
37  
38  
39  
40  
41  
42  
43  
44  
45  
46  
47  
48  
49  
50  
51  
52  
53  
54  
55  
56  
57  
58  
59  
60

For peer review only

**BIBLIOGRAPHY**

1. Guan WJ, Ni ZY, Hu Y, et al. Clinical Characteristics of Coronavirus Disease 2019 in China. *N Engl J Med* 2020 doi: 10.1056/NEJMoa2002032 [published Online First: 2020/02/29]
2. Zhu N, Zhang D, Wang W, et al. A Novel Coronavirus from Patients with Pneumonia in China, 2019. *N Engl J Med* 2020;382(8):727-33. doi: 10.1056/NEJMoa2001017 [published Online First: 2020/01/25]
3. COVID-19 Dashboard by the Center for Systems Science and Engineering (CSSE) at Johns Hopkins University. Available online at: <https://coronavirus.jhu.edu/maphtml> Accessed April 20, 2020
4. Centers for Disease Control Cases of Coronavirus Disease (COVID-19) in the US. Available online at: <https://www.cdc.gov/coronavirus/2019-ncov/cases-updates/cases-in-us.html>. Accessed April 20, 2020.
5. Michigan.gov. Coronavirus Resources - Confirmed cases by Jurisdiction. Available online at: <https://www.michigan.gov/coronavirus/0,9753,7-406-98163-520743--,00.html>. Accessed April 20, 2020.
6. Blue Cross Blue Shield Collaborative Quality Initiatives. Available online at: <https://www.bcbsm.com/providers/value-partnerships/collaborative-quality-initiatives.html>. Accessed April 20, 2020.
7. Goyal P, Choi JJ, Pinheiro LC, et al. Clinical Characteristics of Covid-19 in New York City. *N Engl J Med* 2020 doi: 10.1056/NEJMc2010419 [published Online First: 2020/04/18]

- 1  
2  
3 8. Bhatraju PK, Ghassemieh BJ, Nichols M, et al. Covid-19 in Critically Ill Patients in the  
4  
5 Seattle Region - Case Series. *N Engl J Med* 2020 doi: 10.1056/NEJMoa2004500  
6  
7 [published Online First: 2020/04/01]  
8  
9
- 10 9. Myers LC, Parodi SM, Escobar GJ, et al. Characteristics of Hospitalized Adults With  
11  
12 COVID-19 in an Integrated Health Care System in California. *JAMA* 2020 doi:  
13  
14 10.1001/jama.2020.7202 [published Online First: 2020/04/25]  
15  
16
- 17 10. Grasselli G, Zangrillo A, Zanella A, et al. Baseline Characteristics and Outcomes of  
18  
19 1591 Patients Infected With SARS-CoV-2 Admitted to ICUs of the Lombardy  
20  
21 Region, Italy. *JAMA* 2020 doi: 10.1001/jama.2020.5394 [published Online First:  
22  
23 2020/04/07]  
24  
25
- 26 11. Xie J, Tong Z, Guan X, et al. Clinical Characteristics of Patients Who Died of  
27  
28 Coronavirus Disease 2019 in China. *JAMA Netw Open* 2020;3(4):e205619. doi:  
29  
30 10.1001/jamanetworkopen.2020.5619 [published Online First: 2020/04/11]  
31  
32
- 33 12. Gold JAW, Wong KK, Szablewski CM, et al. Characteristics and Clinical Outcomes  
34  
35 of Adult Patients Hospitalized with COVID-19 - Georgia, March 2020. *MMWR*  
36  
37 *Morb Mortal Wkly Rep* 2020;69(18):545-50. doi: 10.15585/mmwr.mm6918e1  
38  
39 [published Online First: 2020/05/08]  
40  
41
- 42 13. Bi Q, Wu Y, Mei S, et al. Epidemiology and transmission of COVID-19 in 391 cases  
43  
44 and 1286 of their close contacts in Shenzhen, China: a retrospective cohort  
45  
46 study. *Lancet Infect Dis* 2020 doi: 10.1016/S1473-3099(20)30287-5 [published  
47  
48 Online First: 2020/05/01]  
49  
50
- 51 14. Sharfstein JM, Becker SJ, Mello MM. Diagnostic Testing for the Novel Coronavirus.  
52  
53 *JAMA* 2020 doi: 10.1001/jama.2020.3864 [published Online First: 2020/03/10]  
54  
55  
56  
57  
58  
59  
60



- 1  
2  
3 15. Richardson S, Hirsch JS, Narasimhan M, et al. Presenting Characteristics,  
4  
5 Comorbidities, and Outcomes Among 5700 Patients Hospitalized With COVID-19  
6  
7 in the New York City Area. *JAMA* 2020 doi: 10.1001/jama.2020.6775 [published  
8  
9 Online First: 2020/04/23]  
10  
11  
12 16. Bhimraj A, Morgan RL, Shumaker AH, et al. Infectious Diseases Society of America  
13  
14 Guidelines on the Treatment and Management of Patients with COVID-19. *Clin*  
15  
16 *Infect Dis* 2020 doi: 10.1093/cid/ciaa478 [published Online First: 2020/04/28]  
17  
18  
19 17. Rice TW, Janz DR. In Defense of Evidence-Based Medicine for the Treatment of  
20  
21 COVID-19 ARDS. *Ann Am Thorac Soc* 2020 doi: 10.1513/AnnalsATS.202004-  
22  
23 325IP [published Online First: 2020/04/23]  
24  
25  
26 18. Waterer GW, Rello J, Wunderink RG. SARS-CoV-2: First Do No Harm. *Am J Respir*  
27  
28 *Crit Care Med* 2020 doi: 10.1164/rccm.202004-1153ED [published Online First:  
29  
30 2020/04/21]  
31  
32  
33 19. Tang W, Cao Z, Han M, et al. Hydroxychloroquine in patients with mainly mild to  
34  
35 moderate coronavirus disease 2019: open label, randomised controlled trial. *BMJ*  
36  
37 2020;369:m1849. doi: 10.1136/bmj.m1849 [published Online First: 2020/05/16]  
38  
39  
40 20. Mahevas M, Tran VT, Roumier M, et al. Clinical efficacy of hydroxychloroquine in  
41  
42 patients with covid-19 pneumonia who require oxygen: observational  
43  
44 comparative study using routine care data. *BMJ* 2020;369:m1844. doi:  
45  
46 10.1136/bmj.m1844 [published Online First: 2020/05/16]  
47  
48  
49 21. Rosenberg ES, Dufort EM, Udo T, et al. Association of Treatment With  
50  
51 Hydroxychloroquine or Azithromycin With In-Hospital Mortality in Patients With  
52  
53  
54  
55  
56  
57  
58  
59  
60

1  
2  
3 COVID-19 in New York State. *JAMA* 2020 doi: 10.1001/jama.2020.8630

4  
5 [published Online First: 2020/05/12]

- 6  
7  
8 22. Bessiere F, Rocchia H, Deliniere A, et al. Assessment of QT Intervals in a Case  
9  
10 Series of Patients With Coronavirus Disease 2019 (COVID-19) Infection Treated  
11  
12 With Hydroxychloroquine Alone or in Combination With Azithromycin in an  
13  
14 Intensive Care Unit. *JAMA Cardiol* 2020 doi: 10.1001/jamacardio.2020.1787  
15  
16 [published Online First: 2020/05/02]

- 17  
18  
19 23. Angus DC. Optimizing the Trade-off Between Learning and Doing in a Pandemic.  
20  
21 *JAMA* 2020 doi: 10.1001/jama.2020.4984 [published Online First: 2020/04/01]

- 22  
23  
24 24. Wells K. Hospitals Vary Treatment for Coronavirus Patients. *National Public Radio*  
25  
26 2020; Available online at: [https://www.npr.org/2020/05/18/857727140/hospitals-](https://www.npr.org/2020/05/18/857727140/hospitals-vary-treatment-for-coronavirus-patients)  
27  
28 [vary-treatment-for-coronavirus-patients](https://www.npr.org/2020/05/18/857727140/hospitals-vary-treatment-for-coronavirus-patients). Accessed May 19, 2020.  
29  
30  
31  
32  
33  
34  
35  
36  
37  
38  
39  
40  
41  
42  
43  
44  
45  
46  
47  
48  
49  
50  
51  
52  
53  
54  
55  
56  
57  
58  
59  
60

**Table 1. Demographic and Clinical Characteristics of COVID-19 Positive Patients (n=1,024)**

|                                              |                                          |                  |
|----------------------------------------------|------------------------------------------|------------------|
| Residence prior to hospitalization - no. (%) |                                          |                  |
|                                              | Home                                     | 824 (80.5%)      |
|                                              | Congregated living facility <sup>1</sup> | 165 (16.1%)      |
|                                              | Sub-acute rehabilitation facility        | 9 (0.9%)         |
|                                              | Unknown                                  | 18 (1.8%)        |
| Admission location - no. (%)                 |                                          |                  |
|                                              | Emergency department                     | 951 (92.9%)      |
|                                              | Transfer from Another Hospital           | 60 (5.9%)        |
|                                              | Direct admission                         | 7 (0.7%)         |
| Median age (IQR) - yr                        |                                          | 63.3 (50.9-74.4) |
| Male Sex - no. (%)                           |                                          | 533 (52.1%)      |
| Race - no. (%)                               |                                          |                  |
|                                              | Black                                    | 526 (51.4%)      |
|                                              | White                                    | 390 (38.1%)      |
|                                              | Unknown                                  | 45 (4.4%)        |
|                                              | Asian                                    | 30 (2.9%)        |
|                                              | Other                                    | 26 (2.5%)        |
|                                              | Native                                   | 4 (0.4%)         |
|                                              | Islander                                 | 3 (0.3%)         |
| Ethnicity - no. (%)                          |                                          |                  |
|                                              | Non-Hispanic                             | 873 (85.3%)      |
|                                              | Hispanic                                 | 30 (2.9%)        |
|                                              | Unknown                                  | 117 (11.4%)      |
| Insurance – no. (%)                          |                                          |                  |
|                                              | Medicare                                 | 497 (48.5%)      |
|                                              | Commercial                               | 251 (24.5%)      |
|                                              | Medicaid                                 | 128 (12.5%)      |
|                                              | Self-pay                                 | 29 (2.8%)        |
|                                              | Other <sup>2</sup>                       | 117 (11.4%)      |
| BMI - median (IQR)                           |                                          | 30.6 (25.9-37.1) |
| Smoking history - no. (%)                    |                                          |                  |
|                                              | Never                                    | 615 (60.2%)      |
|                                              | Former                                   | 279 (27.3%)      |
|                                              | Current                                  | 61 (6.0%)        |
|                                              | Unknown                                  | 65 (6.4%)        |
| Vaping history - no. (%)                     |                                          |                  |
|                                              | Never                                    | 645 (63.2%)      |
|                                              | Former                                   | 366 (35.8%)      |
|                                              | Current                                  | 6 (0.6%)         |
|                                              | Unknown                                  | 3 (0.3%)         |
| Coexisting disorder - no. (%)                |                                          |                  |
|                                              | Hypertension                             | 670 (65.4%)      |
|                                              | Diabetes                                 | 377 (36.8%)      |
|                                              | Cardiovascular Disease                   | 266 (26.0%)      |
|                                              | Moderate/ Severe Kidney Disease          | 239 (23.3%)      |
|                                              | Asthma                                   | 132 (12.9%)      |
|                                              | CHF/Cardiomyopathy                       | 131 (12.8%)      |
|                                              | Dementia                                 | 123 (12.0%)      |
|                                              | Chronic Obstructive Pulmonary Disease    | 115 (11.2%)      |
|                                              | Cerebrovascular disease/ paraplegia      | 97 (9.5%)        |

|    |                                                            |             |
|----|------------------------------------------------------------|-------------|
| 1  |                                                            |             |
| 2  |                                                            |             |
| 3  | Cancer <sup>3</sup>                                        | 77 (7.5%)   |
| 4  | Peripheral Vascular Disorders                              | 41 (4.0%)   |
| 5  | Chronic Pulmonary Disease (non-asthma/COPD)                | 35 (3.4%)   |
| 6  | Rheumatoid Arthritis                                       | 29 (2.8%)   |
| 7  | Peptic Ulcer Disease                                       | 10 (1.0%)   |
| 8  | HIV/AIDS                                                   | 7 (0.7%)    |
| 9  | Organ transplant                                           | 8 (0.8%)    |
| 10 | Inflammatory Bowel Disease                                 | 8 (0.8%)    |
| 11 | No reported comorbidities                                  | 152 (14.9%) |
| 12 | Home Medications                                           |             |
| 13 | ACE Inhibitors                                             | 180 (17.6%) |
| 14 | Steroids/immunosuppressive therapy                         | 115 (11.3%) |
| 15 | ARBs                                                       | 136 (13.3%) |
| 16 | NSAIDs                                                     | 182 (17.8%) |
| 17 | Statins                                                    | 378 (37.0%) |
| 18 | Beta Blockers                                              | 298 (29.2%) |
| 19 | Anticoagulants                                             | 149 (14.6%) |
| 20 | Oral Steroids <sup>4</sup>                                 | 62 (6.1%)   |
| 21 | Inhaled steroids                                           | 43 (4.2%)   |
| 22 | Inhaled long-acting beta-agonist                           | 30 (2.9%)   |
| 23 | Inhaled long-acting anti-cholinergic                       | 5 (0.5%)    |
| 24 | Home oxygen therapy                                        | 36 (3.5%)   |
| 25 | Duration of symptoms before admission, days - median (IQR) | 6 (3-9)     |
| 26 | Respiratory symptoms - no. (%)                             |             |
| 27 | Cough (New or Worsening)                                   | 751 (73.3%) |
| 28 | Fever - no. (%)                                            | 735 (71.8%) |
| 29 | Fever (99.0 - 100.4 [F])                                   | 151 (14.7%) |
| 30 | Fever ( >100.4 [F])                                        | 390 (38.1%) |
| 31 | Subjective fever                                           | 194 (18.9%) |
| 32 | Dyspnea / shortness of breath                              | 739 (72.2%) |
| 33 | Nausea/vomiting or diarrhea                                | 403 (39.4%) |
| 34 | Fatigue                                                    | 361 (35.3%) |
| 35 | Myalgias                                                   | 264 (25.8%) |
| 36 | Weakness                                                   | 253 (24.7%) |
| 37 | Sputum production                                          | 146 (14.3%) |
| 38 | Altered Mental Status                                      | 144 (14.1%) |
| 39 | Non-pleuritic chest pain                                   | 100 (9.8%)  |
| 40 | Generalized malaise                                        | 91 (8.9%)   |
| 41 | Rhinorrhea                                                 | 75 (7.3%)   |
| 42 | Pleuritic chest pain                                       | 75 (7.3%)   |
| 43 | No reported symptoms                                       | 14 (1.4%)   |
| 44 | Sick contacts - no. (%)                                    | 381 (37.2%) |
| 45 | Known COVID-19 positive                                    | 244 (23.8%) |
| 46 | Unknown COVID-19 status                                    | 236 (23.0%) |
| 47 | Healthcare worker - no. (%)                                | 72 (7.0%)   |
| 48 | Service worker - no. (%) <sup>5</sup>                      | 59 (5.8%)   |
| 49 | Initial location of admission - no. (%)                    |             |
| 50 | General Medical/Surgical ward                              | 608 (59.5%) |
| 51 | ICU                                                        | 138 (13.5%) |
| 52 | Step-down unit                                             | 160 (15.7%) |
| 53 | Observation unit                                           | 115 (11.3%) |
| 54 | Missing/Unknown                                            | 3 (0.3%)    |
| 55 | Admitted to COVID-19 specific (i.e., cohorted) unit        | 419 (40.9%) |
| 56 |                                                            |             |
| 57 |                                                            |             |
| 58 |                                                            |             |
| 59 |                                                            |             |
| 60 |                                                            |             |

| <i>Advanced Directives on admission</i> |                        |           |
|-----------------------------------------|------------------------|-----------|
|                                         | DNR/DNI                | 64 (6.3%) |
|                                         | No CPR (intubation OK) | 19 (1.9%) |
|                                         | No intubation (CPR OK) | 3 (0.3%)  |

Abbreviations: COVID-19, coronavirus disease 2019; SE=standard error; IQR, inter-quartile range

<sup>1</sup> *Includes assisted living, group home, skilled nursing facility, and homeless shelters, correctional facilities, community living and inpatient psychiatric facilities.*

<sup>2</sup> *Includes other payers, Michigan, out-of-state and government.*

<sup>3</sup> *Includes leukemia, lymphoma, hematologic cancer and any malignancy.*

<sup>4</sup> *Includes oral prednisone, prednisolone, hydrocortisone and dexamethasone.*

<sup>5</sup> *Service workers include food service, transportation, postal/delivery and other related fields.*

**Table 2 – Clinical and Laboratory Data in COVID-19 Positive Patients by ICU-status (n=1,024)**

|                                                                     | Ever ICU<br>(n = 232) | General Ward<br>(n = 792) | p      |
|---------------------------------------------------------------------|-----------------------|---------------------------|--------|
| <b>Vital signs on day of hospital admission, no. (%)</b>            |                       |                           |        |
| Fever (>100.4 [F])                                                  | 95 (40.9%)            | 295 (37.2%)               | 0.3073 |
| Hypoxia / new or escalated O2 requirement                           | 142 (61.2%)           | 257 (32.4%)               | <.0001 |
| Supplemental oxygen use                                             | 96 (41.4%)            | 145 (18.3%)               | <.0001 |
| Respiratory rate > 20                                               | 139 (59.9%)           | 306 (38.6%)               | <.0001 |
| Heart rate > 100 per minute                                         | 99 (42.7%)            | 321 (40.5%)               | 0.5596 |
| Systolic blood pressure < 100 mmHg                                  | 27 (11.6%)            | 45 (5.7%)                 | 0.0018 |
| <b>Day 1 laboratory measures, median (IQR)</b>                      |                       |                           |        |
| Hemoglobin                                                          | 13.2 (11.4-14.7)      | 13.2 (12.0-14.6)          | 0.4573 |
| White blood cell count, K/uL                                        | 7.3 (5.5-9.7)         | 6.5 (4.8-8.4)             | <.0001 |
| Absolute lymphocyte count, K/uL                                     | 0.80 (0.60-1.20)      | 1.00 (0.70-1.30)          | 0.3440 |
| Platelet count, K/uL                                                | 197 (149-256)         | 204 (159-268)             | 0.4875 |
| ALT, IU/L                                                           | 32.0 (20.0-60.0)      | 27.0 (18.0-41.0)          | 0.2228 |
| Lactate, mmol/L                                                     | 1.6 (1.2-2.5)         | 1.4 (1.0-1.8)             | 0.0010 |
| Troponin pg/mL                                                      | 9 (0-38)              | 0 (0-12)                  | 0.5872 |
| Brain Natriuretic Peptide (BNP), pg/mL                              | 79 (34-236)           | 49 (18-157)               | 0.0088 |
| Procalcitonin, ng/mL                                                | 0.30 (0.17-0.94)      | 0.12 (0.06-0.29)          | 0.5054 |
| D-dimer, mg/L                                                       | 2.88 (1.19-35.00)     | 1.65 (0.59-368.00)        | 0.8240 |
| Ferritin, ng/mL                                                     | 872 (379-1531)        | 559 (237-1019)            | 0.1074 |
| CRP, mg/dL                                                          | 24.3 (12.0-107.1)     | 13.8 (5.8-66.2)           | 0.0031 |
| LDH, IU/L                                                           | 476 (337-668)         | 346 (254-455)             | <.0001 |
| Creatinine, mg/dL                                                   | 1.3 (1.0-2.0)         | 1.1 (0.8-1.5)             | 0.5736 |
| Total Bilirubin, mg/dL                                              | 0.6 (0.4-0.9)         | 0.5 (0.4-0.8)             | 0.7147 |
| Respiratory viral panel positive for non-COVID-19 respiratory virus | 2 (0.9%)              | 7 (0.9%)                  | 0.9443 |
| Positive blood culture within 1 day of admission                    | 7 (3.0%)              | 9 (1.1%)                  | 0.0422 |
| Positive respiratory culture within 1 day of admission              | 4 (1.7%)              | 4 (0.5%)                  | 0.0636 |
| Any Chest imaging <sup>1</sup>                                      | 139 (59.9%)           | 389 (49.1%)               | 0.0038 |
| Chest X-ray                                                         | 118 (50.9%)           | 322 (40.7%)               | 0.0058 |
| Chest Computed Tomography                                           | 34 (14.7%)            | 106 (13.4%)               | 0.6201 |
| <b>Imaging findings - no. (%)</b>                                   |                       |                           |        |
| Pneumonia                                                           | 61 (26.3%)            | 100 (12.6%)               | <.0001 |
| Non-specified opacities/air-space disease                           | 84 (36.2%)            | 161 (20.3%)               | <.0001 |
| Pleural effusion                                                    | 32 (13.8%)            | 37 (4.7%)                 | <.0001 |
| Normal/no abnormalities                                             | 5 (2.2%)              | 30 (3.8%)                 | 0.2287 |
| Pulmonary Edema                                                     | 25 (10.8%)            | 29 (3.7%)                 | <.0001 |
| CT with Ground Glass Infiltrates                                    | 14 (6.0%)             | 58 (7.3%)                 | 0.4995 |

| <b>Respiratory support on day of admission - no. (%)</b>                                                   |                                             |             |             |        |
|------------------------------------------------------------------------------------------------------------|---------------------------------------------|-------------|-------------|--------|
|                                                                                                            | Invasive mechanical ventilation             | 46 (19.8%)  | 2 (0.3%)    | <.0001 |
|                                                                                                            | Non-invasive positive pressure              | 5 (2.2%)    | 2 (0.3%)    | 0.0020 |
|                                                                                                            | HHFNC                                       | 5 (2.2%)    | 5 (2.2%)    | 0.1905 |
|                                                                                                            | Oxygen mask (>40% <i>fio</i> <sub>2</sub> ) | 17 (7.3%)   | 20 (2.6%)   | 0.0006 |
|                                                                                                            | Nasal cannula oxygen, 1-6L                  | 76 (32.8%)  | 261 (33.0%) | 0.9555 |
|                                                                                                            | No supplemental oxygen                      | 83 (8.1%)   | 502 (49.0%) | <.0001 |
| <b>Treatments during hospitalization - no. (%)</b>                                                         |                                             |             |             |        |
| <i>Covid-19 Specific treatment(s)</i>                                                                      |                                             |             |             |        |
|                                                                                                            | Hydroxychloroquine                          | 154 (66.4%) | 364 (46.0%) | <.0001 |
|                                                                                                            | Hydroxychloroquine + Azithromycin           | 112 (48.3%) | 260 (32.8%) | <.0001 |
|                                                                                                            | Vitamin C (PO or IV)                        | 35 (15.1%)  | 68 (8.6%)   | 0.0038 |
|                                                                                                            | Remdesivir                                  | 7 (3.0%)    | 10 (1.3%)   | 0.0658 |
|                                                                                                            | IL-6 receptor inhibitor                     | 27 (11.6%)  | . (.%)      | <.0001 |
|                                                                                                            | <i>Corticosteroids</i> <sup>2</sup>         | 79 (34.1%)  | 143 (18.1%) | <.0001 |
|                                                                                                            | <i>Antibiotics</i>                          | 213 (91.8%) | 558 (70.5%) | <.0001 |
|                                                                                                            | Azithromycin                                | 149 (64.2%) | 415 (52.4%) | 0.0014 |
|                                                                                                            | Ceftriaxone                                 | 124 (53.4%) | 345 (43.6%) | 0.0079 |
|                                                                                                            | Cefepime                                    | 90 (38.8%)  | 79 (10.0%)  | <.0001 |
|                                                                                                            | Doxycycline                                 | 37 (15.9%)  | 111 (14.0%) | 0.4615 |
|                                                                                                            | Vancomycin                                  | 115 (49.6%) | 106 (13.4%) | <.0001 |
|                                                                                                            | Linezolid                                   | 12 (5.2%)   | 8 (1.0%)    | <.0001 |
|                                                                                                            | Anti-pseudomonals <sup>3</sup>              | 123 (53.0%) | 115 (14.5%) | <.0001 |
|                                                                                                            | <i>Antivirals</i> <sup>4</sup>              | 1 (0.4%)    | 13 (1.6%)   | 0.1626 |
|                                                                                                            | <i>Enrolled in clinical trial</i>           | 10 (4.3%)   | 12 (1.5%)   | 0.0098 |
| Abbreviations: COVID-19=coronavirus disease 2019; HHFNC=heated high flow nasal cannula; SE=standard error. |                                             |             |             |        |
| 1 Includes chest imaging results 7 days before hospital encounter                                          |                                             |             |             |        |
| 2 Hydrocortisone, Methylprednisolone, prednisolone or prednisone                                           |                                             |             |             |        |
| 3 Cefepime, gentamicin, imipenem, meropenem, piperacillin-tazobactam, ceftazadime, aztreonam or tobramycin |                                             |             |             |        |
| 4 Non-remdesivir antivirals including Oseltamivir, Lopinavir/Ritonavir, Ribavirin, others                  |                                             |             |             |        |

**Table 3. Organ support for COVID-19 Positive Patients by Discharge Status (n=1,024)**

|                                                                                                                                                                                                                                                                                                                                                                         | All patients<br>(n =1,024) | Discharged<br>Alive<br>n = 805 | Died in<br>Hospital<br>n = 219 |
|-------------------------------------------------------------------------------------------------------------------------------------------------------------------------------------------------------------------------------------------------------------------------------------------------------------------------------------------------------------------------|----------------------------|--------------------------------|--------------------------------|
| Treated in an ICU                                                                                                                                                                                                                                                                                                                                                       | 232 (22.7%)                | 101 (12.5%)                    | 131 (59.8%)                    |
| <i>Respiratory support ever received, no. (%)*</i>                                                                                                                                                                                                                                                                                                                      |                            |                                |                                |
| Invasive mechanical ventilation                                                                                                                                                                                                                                                                                                                                         | 161 (15.7%)                | 47 (5.8%)                      | 114 (52.1%)                    |
| Non-invasive positive pressure ventilation                                                                                                                                                                                                                                                                                                                              | 27 (2.6%)                  | 10 (1.2%)                      | 17 (7.8%)                      |
| HHFNC                                                                                                                                                                                                                                                                                                                                                                   | 90 (8.8%)                  | 57 (7.1%)                      | 33 (15.1%)                     |
| Oxygen mask (>40%FIO <sub>2</sub> )                                                                                                                                                                                                                                                                                                                                     | 159 (15.5%)                | 76 (9.4%)                      | 83 (37.9%)                     |
| <i>Maximum respiratory support received, no. (%)**</i>                                                                                                                                                                                                                                                                                                                  |                            |                                |                                |
| Invasive mechanical ventilation                                                                                                                                                                                                                                                                                                                                         | 161 (15.7%)                | 47 (5.8%)                      | 114 (52.1%)                    |
| Non-invasive positive pressure                                                                                                                                                                                                                                                                                                                                          | 15 (1.5%)                  | 6 (0.7%)                       | 9 (4.1%)                       |
| HHFNC                                                                                                                                                                                                                                                                                                                                                                   | 60 (5.9%)                  | 40 (5.0%)                      | 20 (9.1%)                      |
| Oxygen mask (>40%FIO <sub>2</sub> )                                                                                                                                                                                                                                                                                                                                     | 88 (8.6%)                  | 48 (6.0%)                      | 40 (18.3%)                     |
| Nasal canula oxygen, 1-6L/min                                                                                                                                                                                                                                                                                                                                           | 441 (43.1%)                | 415 (51.6%)                    | 26 (11.9%)                     |
| No respiratory support                                                                                                                                                                                                                                                                                                                                                  | 259 (25.3%)                | 249 (30.9%)                    | 10 (4.6%)                      |
| <i>Max FIO<sub>2</sub> received, no. (%)</i>                                                                                                                                                                                                                                                                                                                            |                            |                                |                                |
| 91-100%                                                                                                                                                                                                                                                                                                                                                                 | 126 (12.3%)                | 34 (4.2%)                      | 92 (42%)                       |
| 81-90%                                                                                                                                                                                                                                                                                                                                                                  | 30 (2.9%)                  | 13 (1.6%)                      | 17 (7.8%)                      |
| 71-80%                                                                                                                                                                                                                                                                                                                                                                  | 86 (8.4%)                  | 42 (5.2%)                      | 44 (20.1%)                     |
| 61-70%                                                                                                                                                                                                                                                                                                                                                                  | 16 (1.6%)                  | 9 (1.1%)                       | 7 (3.2%)                       |
| 51-60%                                                                                                                                                                                                                                                                                                                                                                  | 26 (2.5%)                  | 14 (1.7%)                      | 12 (5.5%)                      |
| 41-50%                                                                                                                                                                                                                                                                                                                                                                  | 24 (2.3%)                  | 20 (2.5%)                      | 4 (1.8%)                       |
| 31-40%                                                                                                                                                                                                                                                                                                                                                                  | 170 (16.6%)                | 144 (17.9%)                    | 26 (11.9%)                     |
| 21-30%                                                                                                                                                                                                                                                                                                                                                                  | 287 (28%)                  | 280 (34.8%)                    | 7 (3.2%)                       |
| <i>Non-respiratory organ support received, no. (%)</i>                                                                                                                                                                                                                                                                                                                  |                            |                                |                                |
| Vasopressor                                                                                                                                                                                                                                                                                                                                                             | 141 (13.8%)                | 35 (4.3%)                      | 106 (48.4%)                    |
| Any dialysis***                                                                                                                                                                                                                                                                                                                                                         | 53 (5.2%)                  | 17 (2.1%)                      | 36 (16.4%)                     |
| CRRT only                                                                                                                                                                                                                                                                                                                                                               | 17 (1.7%)                  | 1 (0.1%)                       | 16 (7.3%)                      |
| iHD only                                                                                                                                                                                                                                                                                                                                                                | 28 (2.7%)                  | 15 (1.9%)                      | 13 (5.9%)                      |
| CPR                                                                                                                                                                                                                                                                                                                                                                     | 41 (4.0%)                  | 1 (0.1%)                       | 40 (18.3%)                     |
| Abbreviations: SE=standard error; ECMO=extra-corporeal membrane oxygenation; HHFNC=heated high flow nasal cannula; FiO <sub>2</sub> =fraction of inspired oxygen; L= liters/min; ICU=intensive care unit; PE=pulmonary embolism; DVT=deep vein thrombosis; CPR=cardiopulmonary resuscitation; CRRT=continuous renal replacement therapy; iHD=intermittent hemodialysis; |                            |                                |                                |
| * Represents any use of respiratory support. Numbers are greater than 100% as one patient may have received multiple treatments.                                                                                                                                                                                                                                        |                            |                                |                                |
| ** Represents the highest level of respiratory support a patient received during hospitalization.                                                                                                                                                                                                                                                                       |                            |                                |                                |
| *** Includes Intermittent Hemodialysis (iHD), dialysis and ultrafiltration                                                                                                                                                                                                                                                                                              |                            |                                |                                |



**Table 4. Variation in Clinical Care and Outcomes in COVID-19 Positive Patients Across Hospitals**

|                                                          | Range across Hospitals |                       |                       |        |                       |                       |       | <i>p</i> <sup>†</sup> |
|----------------------------------------------------------|------------------------|-----------------------|-----------------------|--------|-----------------------|-----------------------|-------|-----------------------|
|                                                          | Min                    | 10 <sup>th</sup> Pctl | 25 <sup>th</sup> Pctl | Median | 75 <sup>th</sup> Pctl | 90 <sup>th</sup> Pctl | Max   |                       |
| Patient characteristics                                  |                        |                       |                       |        |                       |                       |       |                       |
| Age >65, %                                               | 30.2                   | 35.3                  | 39.6                  | 51.3   | 56.8                  | 64.4                  | 65.5  | <.0001                |
| Black, %                                                 | 0.0                    | 17.7                  | 29.7                  | 46.2   | 76.4                  | 93.7                  | 94.6  | <.0001                |
| Male, %                                                  | 39.2                   | 45.6                  | 47.1                  | 53.0   | 56.8                  | 72.4                  | 73.8  | 0.07                  |
| Charlson comorbidity index, median                       | 0.0                    | 1.0                   | 1.0                   | 1.0    | 1.0                   | 2.0                   | 2.0   | 0.01                  |
| BMI, median                                              | 24.3                   | 28.4                  | 29.5                  | 31.1   | 33.3                  | 36.5                  | 36.9  | 0.09                  |
| Age, median in years                                     | 39.0                   | 46.5                  | 60.8                  | 62.4   | 66.4                  | 73.5                  | 76.0  | <.0001                |
| Admission information, %                                 |                        |                       |                       |        |                       |                       |       |                       |
| Hospital-to-hospital transfer                            | 0.0                    | 0.0                   | 0.0                   | 0.00   | 2.8                   | 10.7                  | 20.9  | <.0001                |
| Admitted directly to ICU                                 | 0.0                    | 0.0                   | 2.9                   | 6.15   | 14.8                  | 20.5                  | 43.8  | <.0001                |
| Transferred from floor to ICU                            | 0.0                    | 0.0                   | 0.0                   | 8.4    | 17.6                  | 18.8                  | 24.1  | 0.09                  |
| Admitted to a Cohorted unit                              | 0.0                    | 2.1                   | 18.6                  | 67.9   | 85.71                 | 96.3                  | 97.1  | <.0001                |
| Severe illness on presentation <sup>2</sup>              | 0.0                    | 0.00                  | 0.00                  | 0.0    | 3.7                   | 7.1                   | 7.7   | 0.09                  |
| Vasopressor use on day 1                                 | 0.0                    | 0.00                  | 0.00                  | 2.1    | 6.4                   | 10.3                  | 14.8  | 0.04                  |
| Mechanical ventilation on day 1                          | 0.0                    | 0.00                  | 0.00                  | 2.51   | 8.6                   | 11.1                  | 12.8  | 0.03                  |
| Treatment, %                                             |                        |                       |                       |        |                       |                       |       |                       |
| Treated in a Cohorted Unit                               | 0.0                    | 0.00                  | 6.3                   | 57.1   | 90.9                  | 100.0                 | 100.0 | <.0001                |
| Treated in an ICU                                        | 4.2                    | 5.4                   | 14.0                  | 19.1   | 31.0                  | 38.5                  | 62.5  | <.0001                |
| COVID-19 Specific treatment                              | 32.4                   | 57.1                  | 69.2                  | 76.4   | 81.4                  | 90.2                  | 96.3  | <.0001                |
| Concurrent antibiotic and COVID-19 specific treatment(s) | 24.3                   | 42.9                  | 59.4                  | 69.8   | 76.7                  | 84.3                  | 96.3  | <.0001                |
| Hydroxychloroquine                                       | 13.5                   | 31.4                  | 42.3                  | 59.7   | 65.5                  | 81.5                  | 82.4  | <.0001                |
| Mechanical ventilation                                   | 2.1                    | 2.7                   | 6.4                   | 10.9   | 31.0                  | 38.5                  | 40.6  | <.0001                |
| Vasopressors                                             | 2.2                    | 2.9                   | 7.0                   | 12.1   | 25.0                  | 32.1                  | 32.5  | <.0001                |
| CPR before death                                         | 0.0                    | 0.0                   | 8.3                   | 14.3   | 33.3                  | 40.0                  | 66.7  | 0.0102                |
| Outcomes, %                                              |                        |                       |                       |        |                       |                       |       |                       |
| Days of mechanical ventilation, median <sup>3</sup>      | 1.0                    | 1.0                   | 1.0                   | 5.0    | 8.0                   | 8.0                   | 9.0   | 0.01                  |
| Length of stay, median                                   | 2.0                    | 3.0                   | 3.0                   | 4.5    | 6.0                   | 8.0                   | 8.5   | <.0001                |
| ICU length of stay, median <sup>4</sup>                  | 1.0                    | 2.0                   | 3.5                   | 5.0    | 6.5                   | 7.5                   | 9.5   | 0.01                  |
| DVT                                                      | 0.0                    | 0.0                   | 0.0                   | 0.0    | 2.1                   | 3.5                   | 7.1   | 0.05                  |
| VTE                                                      | 0.0                    | 0.0                   | 0.0                   | 2.9    | 5.2                   | 6.3                   | 10.7  | 0.20                  |
| PE                                                       | 0.0                    | 0.0                   | 0.0                   | 1.8    | 3.9                   | 6.3                   | 7.1   | 0.72                  |
| Discharge status, %                                      |                        |                       |                       |        |                       |                       |       |                       |
| Death                                                    | 7.9                    | 8.3                   | 14.6                  | 21.3   | 31.0                  | 41.4                  | 45.7  | <.0001                |
| Transferred to another hospital                          | 0.0                    | 0.0                   | 0.0                   | 0.0    | 1.6                   | 2.7                   | 5.1   | 0.07                  |

|                 |      |      |      |      |      |      |      |        |
|-----------------|------|------|------|------|------|------|------|--------|
| Discharged home | 42.3 | 48.2 | 62.1 | 67.5 | 72.9 | 80.0 | 82.5 | <.0001 |
|-----------------|------|------|------|------|------|------|------|--------|

<sup>1</sup> Differences across hospitals were tested using the Kruskal–Wallis test for continuous variables and Pearson chi-square test for categorical variables.

<sup>2</sup> Defined as admission to ICU on day 1 of hospitalization and treatment with both mechanical ventilation and vasopressors.

<sup>3</sup> For patients ever on mechanical ventilation

<sup>4</sup> For patients ever in ICU

\* Variables marked with asterisk represent variation from the demographic cohort

Abbreviations: BMI=body mass index; ICU=intensive care unit; CPR=cardiopulmonary resuscitation; DVT=deep vein thrombosis; VTE=venous thromboembolism; PE=pulmonary embolism

For peer review only

1  
2  
3 **Figure Legend 1**  
4

5 *Legend. Figure depicts the proportion of the N=1024 patient cohort who are hospitalized on*  
6 *general care/ward (yellow), hospitalized in ICU (red), discharged alive (blue), transferred to a*  
7 *new hospital (light blue) and deceased over time to day 20 of hospital admission.*  
8

9  
10 **Figure Legend 2**  
11

12 *Legend. Graph depicts the proportion of the demographic cohort (n=1593) who died in hospital*  
13 *by decade of age. Black shading indicates death whereas blue shading indicates discharge*  
14 *alive.*  
15

16  
17  
18  
19  
20  
21  
22  
23  
24  
25  
26  
27  
28  
29  
30  
31  
32  
33  
34  
35  
36  
37  
38  
39  
40  
41  
42  
43  
44  
45  
46  
47  
48  
49  
50  
51  
52  
53  
54  
55  
56  
57  
58  
59  
60

For peer review only

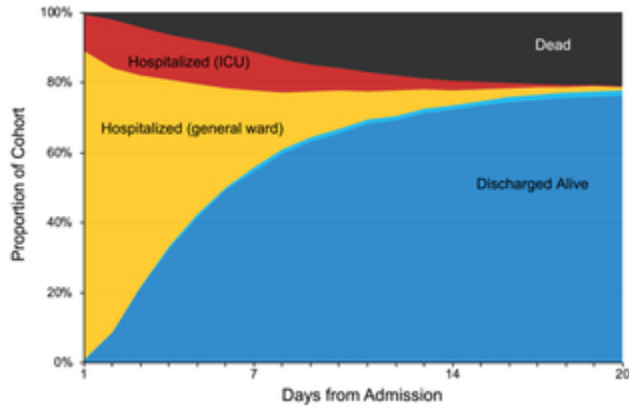

Caption : Figure 1. Proportion of COVID-19 Positive Patients in hospital, ICU, dead, and discharged over time (n=1,024). Figure depicts the proportion of the N=1024 patient cohort who are hospitalized on general care/ward (yellow), hospitalized in ICU (red), discharged alive (blue), transferred to a new hospital (light blue) and deceased over time to day 20 of hospital admission.

27x17mm (300 x 300 DPI)

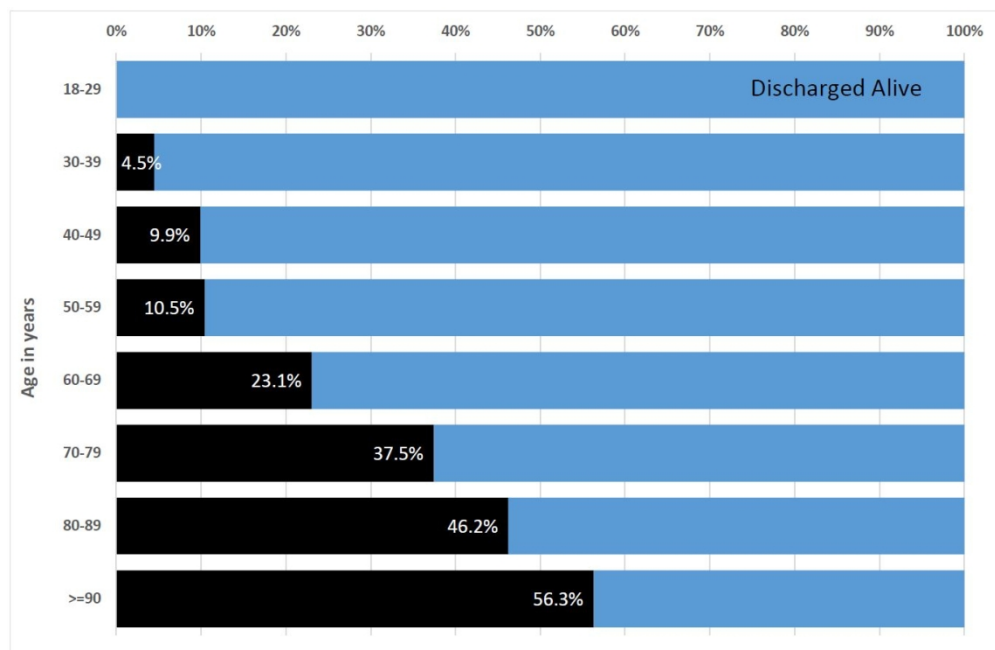

Caption : Figure 2. Mortality rate for COVID-19 positive patients by decade of age (demographic data cohort, n=1,593) Legend. Graph depicts the proportion of the demographic cohort (n=1593) who died in hospital by decade of age. Black shading indicates death whereas blue shading indicates discharge alive.

116x75mm (300 x 300 DPI)

**Appendix: Availability of Laboratory Tests**

| Variable                        | N   | % missing |
|---------------------------------|-----|-----------|
| Hemoglobin (Hgb)                | 959 | 6.3%      |
| WBC *                           | 959 | 6.3%      |
| Absolute Lymphocyte Count *     | 776 | 24.2%     |
| Platelet                        | 957 | 6.5%      |
| ALT *                           | 803 | 21.6%     |
| Lactate                         | 586 | 42.8%     |
| Troponin                        | 588 | 42.6%     |
| Brain Natriuretic Peptide (BNP) | 282 | 72.5%     |
| Procalcitonin                   | 434 | 57.6%     |
| D-dimer                         | 333 | 67.5%     |
| Ferritin *                      | 419 | 59.1%     |
| CRP *                           | 460 | 55.1%     |
| Lactic Acid Dehydrogenase (LDH) | 392 | 61.7%     |
| pH* (imputed)                   | 326 | 68.2%     |
| Creatinine *                    | 956 | 6.6%      |
| Total Bilirubin                 | 777 | 24.1%     |

## STROBE (Strengthening The Reporting of OBServational Studies in Epidemiology) Checklist

A checklist of items that should be included in reports of observational studies. You must report the page number in your manuscript where you consider each of the items listed in this checklist. If you have not included this information, either revise your manuscript accordingly before submitting or note N/A.

**Note:** An Explanation and Elaboration article discusses each checklist item and gives methodological background and published examples of transparent reporting. The STROBE checklist is best used in conjunction with this article (freely available on the Web sites of PLoS Medicine at <http://www.plosmedicine.org/>, Annals of Internal Medicine at <http://www.annals.org/>, and Epidemiology at <http://www.epidem.com/>). Information on the STROBE Initiative is available at [www.strobe-statement.org](http://www.strobe-statement.org).

| Section and Item     | Item No. | Recommendation                                                                                                                                                                                                                                                                                                                                                                                                                                                                 | Reported on Page No. |
|----------------------|----------|--------------------------------------------------------------------------------------------------------------------------------------------------------------------------------------------------------------------------------------------------------------------------------------------------------------------------------------------------------------------------------------------------------------------------------------------------------------------------------|----------------------|
| Title and Abstract   | 1        | (a) Indicate the study's design with a commonly used term in the title or the abstract                                                                                                                                                                                                                                                                                                                                                                                         |                      |
|                      |          | (b) Provide in the abstract an informative and balanced summary of what was done and what was found                                                                                                                                                                                                                                                                                                                                                                            |                      |
| <b>Introduction</b>  |          |                                                                                                                                                                                                                                                                                                                                                                                                                                                                                |                      |
| Background/Rationale | 2        | Explain the scientific background and rationale for the investigation being reported                                                                                                                                                                                                                                                                                                                                                                                           |                      |
| Objectives           | 3        | State specific objectives, including any prespecified hypotheses                                                                                                                                                                                                                                                                                                                                                                                                               |                      |
| <b>Methods</b>       |          |                                                                                                                                                                                                                                                                                                                                                                                                                                                                                |                      |
| Study Design         | 4        | Present key elements of study design early in the paper                                                                                                                                                                                                                                                                                                                                                                                                                        |                      |
| Setting              | 5        | Describe the setting, locations, and relevant dates, including periods of recruitment, exposure, follow-up, and data collection                                                                                                                                                                                                                                                                                                                                                |                      |
| Participants         | 6        | (a) <i>Cohort study</i> —Give the eligibility criteria, and the sources and methods of selection of participants. Describe methods of follow-up<br><br><i>Case-control study</i> —Give the eligibility criteria, and the sources and methods of case ascertainment and control selection. Give the rationale for the choice of cases and controls<br><br><i>Cross-sectional study</i> —Give the eligibility criteria, and the sources and methods of selection of participants |                      |
|                      |          | (b) <i>Cohort study</i> —For matched studies, give matching criteria and number of exposed and unexposed<br><br><i>Case-control study</i> —For matched studies, give matching criteria and the number of controls per case                                                                                                                                                                                                                                                     |                      |
| Variables            | 7        | Clearly define all outcomes, exposures, predictors, potential confounders, and effect modifiers. Give diagnostic criteria, if applicable                                                                                                                                                                                                                                                                                                                                       |                      |

| Section and Item             | Item No. | Recommendation                                                                                                                                                                                                                                                                                            | Reported on Page No. |
|------------------------------|----------|-----------------------------------------------------------------------------------------------------------------------------------------------------------------------------------------------------------------------------------------------------------------------------------------------------------|----------------------|
| Data Sources/<br>Measurement | 8*       | For each variable of interest, give sources of data and details of methods of assessment (measurement). Describe comparability of assessment methods if there is more than one group                                                                                                                      |                      |
| Bias                         | 9        | Describe any efforts to address potential sources of bias                                                                                                                                                                                                                                                 |                      |
| Study Size                   | 10       | Explain how the study size was arrived at                                                                                                                                                                                                                                                                 |                      |
| Quantitative Variables       | 11       | Explain how quantitative variables were handled in the analyses. If applicable, describe which groupings were chosen and why                                                                                                                                                                              |                      |
| Statistical Methods          | 12       | (a) Describe all statistical methods, including those used to control for confounding                                                                                                                                                                                                                     |                      |
|                              |          | (b) Describe any methods used to examine subgroups and interactions                                                                                                                                                                                                                                       |                      |
|                              |          | (c) Explain how missing data were addressed                                                                                                                                                                                                                                                               |                      |
|                              |          | (d) <i>Cohort study</i> —If applicable, explain how loss to follow-up was addressed<br><i>Case-control study</i> —If applicable, explain how matching of cases and controls was addressed<br><i>Cross-sectional study</i> —If applicable, describe analytical methods taking account of sampling strategy |                      |
|                              |          | (e) Describe any sensitivity analyses                                                                                                                                                                                                                                                                     |                      |
| <b>Results</b>               |          |                                                                                                                                                                                                                                                                                                           |                      |
| Participants                 | 13*      | (a) Report numbers of individuals at each stage of study—eg numbers potentially eligible, examined for eligibility, confirmed eligible, included in the study, completing follow-up, and analysed                                                                                                         |                      |
|                              |          | (b) Give reasons for non-participation at each stage                                                                                                                                                                                                                                                      |                      |
|                              |          | (c) Consider use of a flow diagram                                                                                                                                                                                                                                                                        |                      |
| Descriptive Data             | 14*      | (a) Give characteristics of study participants (eg demographic, clinical, social) and information on exposures and potential confounders                                                                                                                                                                  |                      |
|                              |          | (b) Indicate number of participants with missing data for each variable of interest                                                                                                                                                                                                                       |                      |
|                              |          | (c) <i>Cohort study</i> —Summarise follow-up time (eg, average and total amount)                                                                                                                                                                                                                          |                      |
| Outcome Data                 | 15*      | <i>Cohort study</i> —Report numbers of outcome events or summary measures over time                                                                                                                                                                                                                       |                      |
|                              |          | <i>Case-control study</i> —Report numbers in each exposure category, or summary measures of exposure                                                                                                                                                                                                      |                      |
|                              |          | <i>Cross-sectional study</i> —Report numbers of outcome events or summary measures                                                                                                                                                                                                                        |                      |



| Section and Item         | Item No. | Recommendation                                                                                                                                                                                               | Reported on Page No. |
|--------------------------|----------|--------------------------------------------------------------------------------------------------------------------------------------------------------------------------------------------------------------|----------------------|
| Main Results             | 16       | (a) Give unadjusted estimates and, if applicable, confounder-adjusted estimates and their precision (eg, 95% confidence interval). Make clear which confounders were adjusted for and why they were included |                      |
|                          |          | (b) Report category boundaries when continuous variables were categorized                                                                                                                                    |                      |
|                          |          | (c) If relevant, consider translating estimates of relative risk into absolute risk for a meaningful time period                                                                                             |                      |
| Other Analyses           | 17       | Report other analyses done—eg analyses of subgroups and interactions, and sensitivity analyses                                                                                                               |                      |
| <b>Discussion</b>        |          |                                                                                                                                                                                                              |                      |
| Key Results              | 18       | Summarise key results with reference to study objectives                                                                                                                                                     |                      |
| Limitations              | 19       | Discuss limitations of the study, taking into account sources of potential bias or imprecision. Discuss both direction and magnitude of any potential bias                                                   |                      |
| Interpretation           | 20       | Give a cautious overall interpretation of results considering objectives, limitations, multiplicity of analyses, results from similar studies, and other relevant evidence                                   |                      |
| Generalisability         | 21       | Discuss the generalisability (external validity) of the study results                                                                                                                                        |                      |
| <b>Other Information</b> |          |                                                                                                                                                                                                              |                      |
| Funding                  | 22       | Give the source of funding and the role of the funders for the present study and, if applicable, for the original study on which the present article is based                                                |                      |

\*Give information separately for cases and controls in case-control studies and, if applicable, for exposed and unexposed groups in cohort and cross-sectional studies.

**Once you have completed this checklist, please save a copy and upload it as part of your submission. DO NOT include this checklist as part of the main manuscript document. It must be uploaded as a separate file.**

# BMJ Open

## Variation in COVID-19 Characteristics, Treatment, and Outcomes in Michigan: An Observational Study in 32 Hospitals

|                                 |                                                                                                                                                                                                                                                                                                                                                                                                                                                                                                                                                                                                                                                                                                                        |
|---------------------------------|------------------------------------------------------------------------------------------------------------------------------------------------------------------------------------------------------------------------------------------------------------------------------------------------------------------------------------------------------------------------------------------------------------------------------------------------------------------------------------------------------------------------------------------------------------------------------------------------------------------------------------------------------------------------------------------------------------------------|
| Journal:                        | <i>BMJ Open</i>                                                                                                                                                                                                                                                                                                                                                                                                                                                                                                                                                                                                                                                                                                        |
| Manuscript ID                   | bmjopen-2020-044921.R1                                                                                                                                                                                                                                                                                                                                                                                                                                                                                                                                                                                                                                                                                                 |
| Article Type:                   | Original research                                                                                                                                                                                                                                                                                                                                                                                                                                                                                                                                                                                                                                                                                                      |
| Date Submitted by the Author:   | 21-Jan-2021                                                                                                                                                                                                                                                                                                                                                                                                                                                                                                                                                                                                                                                                                                            |
| Complete List of Authors:       | Chopra, Vineet; University of Michigan Michigan Medicine, General Internal Medicine<br>Flanders, Scott A.; University of Michigan,<br>Vaughn, Valerie ; University of Michigan,<br>Petty, Lindsay; University of Michigan Medical School, Division of Infectious Diseases<br>Gandhi, Tejal; University of Michigan Michigan Medicine<br>McSparron, Jakob; University of Michigan Health System<br>Malani, Anurag; St Joseph Mercy Health System<br>O'Malley, Megan; University of Michigan Michigan Medicine<br>Kim, Tae; University of Michigan Michigan Medicine<br>McLaughlin, Elizabeth; University of Michigan Michigan Medicine<br>Prescott, Hallie; University of Michigan Michigan Medicine, Internal Medicine |
| <b>Primary Subject Heading</b>: | Infectious diseases                                                                                                                                                                                                                                                                                                                                                                                                                                                                                                                                                                                                                                                                                                    |
| Secondary Subject Heading:      | Epidemiology, Infectious diseases, Intensive care                                                                                                                                                                                                                                                                                                                                                                                                                                                                                                                                                                                                                                                                      |
| Keywords:                       | COVID-19, Quality in health care < HEALTH SERVICES ADMINISTRATION & MANAGEMENT, Protocols & guidelines < HEALTH SERVICES ADMINISTRATION & MANAGEMENT                                                                                                                                                                                                                                                                                                                                                                                                                                                                                                                                                                   |
|                                 |                                                                                                                                                                                                                                                                                                                                                                                                                                                                                                                                                                                                                                                                                                                        |

SCHOLARONE™  
Manuscripts



I, the Submitting Author has the right to grant and does grant on behalf of all authors of the Work (as defined in the below author licence), an exclusive licence and/or a non-exclusive licence for contributions from authors who are: i) UK Crown employees; ii) where BMJ has agreed a CC-BY licence shall apply, and/or iii) in accordance with the terms applicable for US Federal Government officers or employees acting as part of their official duties; on a worldwide, perpetual, irrevocable, royalty-free basis to BMJ Publishing Group Ltd ("BMJ") its licensees and where the relevant Journal is co-owned by BMJ to the co-owners of the Journal, to publish the Work in this journal and any other BMJ products and to exploit all rights, as set out in our [licence](#).

The Submitting Author accepts and understands that any supply made under these terms is made by BMJ to the Submitting Author unless you are acting as an employee on behalf of your employer or a postgraduate student of an affiliated institution which is paying any applicable article publishing charge ("APC") for Open Access articles. Where the Submitting Author wishes to make the Work available on an Open Access basis (and intends to pay the relevant APC), the terms of reuse of such Open Access shall be governed by a Creative Commons licence – details of these licences and which [Creative Commons](#) licence will apply to this Work are set out in our licence referred to above.

Other than as permitted in any relevant BMJ Author's Self Archiving Policies, I confirm this Work has not been accepted for publication elsewhere, is not being considered for publication elsewhere and does not duplicate material already published. I confirm all authors consent to publication of this Work and authorise the granting of this licence.

1  
2  
3 **Variation in COVID-19 Characteristics, Treatment, and Outcomes in Michigan: An**  
4  
5 **Observational Study in 32 Hospitals**  
6  
7  
8  
9  
10

11  
12 Vineet Chopra MD, MSc (a,b)  
13

14 Scott A. Flanders MD (a,b)  
15

16 Valerie M. Vaughn MD, MSc (a,b)  
17

18 Lindsay A. Petty MD (c,b)  
19

20 Tejal Gandhi, MD (c,b)  
21

22 Jakob I. McSparron MD (b,d)  
23

24 Anurag N. Malani MD (e,b)  
25

26 Megan O'Malley, PhD (a,b)  
27

28 Tae Kim, MHSA (f,g)  
29

30 Elizabeth McLaughlin MS, RN (a,b)  
31

32 Hallie C. Prescott MD, MSc (d,b)  
33  
34  
35  
36  
37  
38  
39

40 From: (a) The Division of Hospital Medicine, Department of Medicine, University of  
41 Michigan Health System, Ann Arbor, MI, USA; (b) The Michigan Hospital Medicine  
42 Safety Collaborative, Ann Arbor, MI, USA; (c) Division of Infectious Diseases,  
43 Department of Internal Medicine, University of Michigan Health System, Ann Arbor, MI,  
44 USA; (d) Division of Pulmonary and Critical Care Medicine, Department of Medicine,  
45 University of Michigan Health System, Ann Arbor, Michigan, USA; (e) Division of  
46 Infectious Diseases, Department of Internal Medicine, St. Joseph Mercy Health System,  
47  
48  
49  
50  
51  
52  
53  
54  
55  
56  
57  
58  
59  
60

1  
2  
3 Ann Arbor, MI, USA; (f) Michigan Arthroplasty Registry Collaborative Quality Initiative  
4 and (g) Department of Orthopaedic Surgery, University of Michigan Health System, Ann  
5  
6  
7  
8 Arbor, MI, USA.  
9

10  
11  
12 **Abstract Word Count: 299**  
13

14 **Word Count: 3109**  
15

16  
17 **Conflicts of Interest: No relevant conflicts disclosed by coauthors.**  
18

19  
20  
21 **Primary Funding Source:** Blue Cross Blue Shield of Michigan (BCBSM) and Blue  
22  
23  
24 Care Network as part of the BCBSM Value Partnerships program.  
25

26  
27  
28 **Address for Correspondence:**  
29

30 Vineet Chopra MD, MSc  
31

32  
33 2800 Plymouth Road, Building 16, #432 W  
34

35  
36 Ann Arbor, MI 48109  
37

38 [vineetc@umich.edu](mailto:vineetc@umich.edu)  
39

40 Phone - (734) 615-8341  
41

42 Fax - (734) 936-8944  
43

44 **Keywords:**  
45

46  
47 Covid-19; Quality in Health care; Protocols and Guidelines  
48  
49  
50  
51  
52  
53  
54  
55  
56  
57  
58  
59  
60

### **Additional Contributions & Acknowledgements:**

The authors thank Qisu (Sue) Zhang, MPH, Tawny Czilok, RN, MHI, Liz Vasher, RN, Jessica Southwell, RN, MSN, Danny Nielsen, MS, and Jennifer Horowitz, MA for help with data analytics and project management.

We also thank all the BCBSM Collaborative Quality Initiatives (CQI's) that partnered together on data collection and offered project management/analytics support. Lastly, we are grateful to all of the hospitals who volunteered to be part of MiCOVID-19 including: Beaumont-Dearborn, Beaumont-Grosse Pointe, Beaumont- Farmington Hills, Beaumont- Royal Oak, Beaumont- Taylor, Beaumont- Trenton, Beaumont- Troy, Beaumont- Wayne, Bronson Battle Creek, Bronson Methodist, Detroit Medical Center- Detroit Receiving, Detroit Medical Center-Harper Hutzell, Detroit Medical Center-Detroit-Huron Valley Sinai, Henry Ford, Henry Ford Allegiance, Henry Ford Macomb, Henry Ford West Bloomfield, Henry Ford West Wyandotte, Holland Hospital, Hurley Medical Center, Lakeland Hospital, McLaren Flint, McLaren Greater Lansing, McLaren Port Huron, Mercy Health Muskegon, Mercy Health St. Mary's, Metro Health, Michigan Medicine, MidMichigan Alpena, MidMichigan Gratiot, MidMichigan Midland, Munson Medical Center, Oaklawn Hospital, Sinai Grace, Sparrow, St. Joseph Mercy Ann Arbor, St. Joseph Mercy Chelsea, St. Joseph Mercy Livingston, St. Joseph Mercy Oakland, St. Mary Mercy Livonia.

**ABSTRACT****OBJECTIVES**

To describe patient characteristics, symptoms, patterns of care and outcomes for patients hospitalized with COVID-19 in Michigan.

**DESIGN**

Multi-center retrospective cohort study.

**SETTING**

32 acute care hospitals in the state of Michigan.

**PARTICIPANTS**

Patients discharged (March 16 to May 11, 2020) with suspected or confirmed COVID-19 were identified. Trained abstractors collected demographic information on all patients, and detailed clinical data on a subset of COVID-19 positive patients.

**PRIMARY OUTCOME MEASUREMENTS**

Patient characteristics, treatment, and outcomes including cardiopulmonary resuscitation, mortality, and venous thromboembolism within and across hospitals.

**RESULTS**

Demographic-only data from 1,593 COVID-19 positive and 1,259 persons under investigation discharges were collected. Among 1,024 cases with detailed data, the

1  
2  
3 median age was 63 years, median BMI was 30.6, and 51.4% were black. Cough, fever,  
4 and shortness of breath were the top symptoms. 37.2% reported a known COVID-19  
5 contact, 7.0% were healthcare workers, and 16.1% presented from congregated living  
6 facilities.  
7  
8  
9  
10

11  
12 During hospitalization, 232 (22.7%) patients were treated in an ICU, 558 (54.9%)  
13 in a “cohorted” unit, 161 (15.7%) received mechanical ventilation, and 90 (8.8%)  
14 received high-flow nasal cannula. ICU patients more often received hydroxychloroquine  
15 (66% vs. 46%), corticosteroids (34% vs 18%), and antibiotic therapy (92% vs 71%) than  
16 general ward patients ( $p < 0.05$  for all). Overall, 219 (21.4%) patients died, with in-  
17 hospital mortality ranging from 7.9% to 45.7% across hospitals. 73% received at least  
18 one COVID-19-specific treatment, ranging from 32% to 96% across sites.  
19  
20  
21  
22  
23  
24  
25  
26  
27

28 Across 14 hospitals, the proportion of patients admitted directly to an ICU ranged from  
29 0% to 43.8%; mechanical ventilation on admission from 0% to 12.8%; mortality from  
30 7.9% to 45.7%. Use of at least one COVID-19 specific therapy varied from 32% to  
31 96.3% across sites.  
32  
33  
34  
35  
36  
37  
38  
39

## 40 CONCLUSIONS

41  
42 During the early days of the Michigan outbreak of COVID-19, patient  
43 characteristics, treatment, and outcomes varied widely within and across hospitals.  
44  
45  
46  
47  
48  
49  
50  
51  
52  
53  
54  
55  
56  
57  
58  
59  
60



## Article Summary

### Strengths and Limitations of this Study

- Using rigorous data collection including a well-defined sampling strategy and trained data abstractors, our paper is the largest multi-hospital study to examine clinical aspects related to COVID-19 in Michigan.
- This is the first study to examine variations in clinical care processes, treatment approaches and outcomes across hospitals.
- The high rate of use of non-evidence-based therapies for treating COVID-19 has significant safety, economic and policy implications for the most critically ill subsets in the hospital.
- Given the observational nature of the study and potential missing documentation on symptoms, comorbidities, or treatments in the medical record, rationales for treatment or management decisions cannot be determined.
- Our sampling frame may be biased as patients who remain hospitalized may not be included in our cohort.

## INTRODUCTION

Since detection in Wuhan, China,<sup>1 2</sup> over 4.5 million cases of COVID-19, caused by severe acute respiratory syndrome coronavirus-2 (SARS-CoV-2) have been reported.<sup>3</sup> The United States (US) leads the world in the total number of cases, with over 1.5 million cases and 92,000 deaths reported as of May 20, 2020.<sup>4</sup> Within the US, Michigan remains one of the hardest hit states, with over 52,000 cases and 5,000 deaths as of May 20, 2020.<sup>5</sup>

In the early days of the pandemic, data regarding patient characteristics, symptoms and signs and presentation and care strategies including aspects such as oxygenation, laboratory testing, and therapeutics were unclear. As well, short and long-term outcomes of patients exposed to these varying approaches was unknown. Some studies reported substantial variation in patient characteristics and treatment modalities across hospitals. But the extent of such variation and impact on outcomes remained unknown.

Michigan has a long history of collaborative quality improvement work that spans several disciplines including cardiovascular medicine, emergency medicine and hospital medicine, among others.<sup>6</sup> These consortia collect detailed clinical variables from hospitals to populate a central registry, allowing benchmarking and comparisons of care and outcomes. As the COVID-19 pandemic unfolded in Southeast Michigan, several consortia came together to focus data collection on patients hospitalized with COVID-19.

1  
2  
3 Using a well-established data collection strategy, we examined variations in  
4 clinical care processes, treatment approaches, and clinical outcomes across Michigan  
5 hospitals.  
6  
7  
8  
9

## 10 **METHODS**

11  
12 A retrospective cohort design was used. Data were collected from medical  
13 records of patients discharged between March 16, 2020 and May 11, 2020 from one of  
14 32 Michigan hospitals who participate in collaborative quality initiatives sponsored by  
15 Blue Cross Blue Shield of Michigan and Blue Care Network. Trained abstractors at each  
16 hospital identified adult patients  $\geq 18$  years of age that underwent testing for COVID-19  
17 via reverse-transcriptase polymerase chain reaction, including both positive cases and  
18 persons under investigation (PUI) who eventually had a negative test. Demographic  
19 data (age, gender, race, ethnicity, payor) and in-hospital mortality were collected for all  
20 confirmed and PUI cases. A sample of COVID-19 positive cases from each hospital was  
21 selected for detailed abstraction. Positive cases were sorted by day of admission (e.g.,  
22 Mon-Sun) and, for each day, a pseudo-random number (minute of hospital discharge)  
23 was used to select patients for detailed abstraction. Patients who were pregnant,  
24 transitioned to hospice within 3 hours of hospital admission, or discharged against  
25 medical advice were excluded. All data were entered into a registry (Mi-COVID19) using  
26 a structured data collection template.  
27  
28  
29  
30  
31  
32  
33  
34  
35  
36  
37  
38  
39  
40  
41  
42  
43  
44  
45  
46

47 Patient characteristics including comorbidities, home medications, presenting  
48 symptoms and risk factors for COVID-19 (e.g., exposure to sick contacts, healthcare  
49 worker) were collected. Clinical data during hospitalization including location of care  
50 (ward vs. intensive care unit [ICU], a “cohorted” COVID-19 only unit), vital signs, body  
51  
52  
53  
54  
55  
56  
57  
58  
59  
60

1  
2  
3 mass index (BMI), laboratory and radiology findings and therapeutics were abstracted.  
4  
5 Organ supports such as mechanical ventilation and other respiratory support,  
6  
7 vasopressor use, renal replacement therapy (continuous renal replacement therapy  
8  
9 [CRRT] and intermittent hemodialysis [iHD]) were also collected.  
10  
11

12 The primary outcomes of interest included hospital mortality, receipt of  
13  
14 cardiopulmonary resuscitation (CPR), and occurrence of deep vein thrombosis (DVT) or  
15  
16 pulmonary embolism (PE) (based on positive imaging findings or initiation of empiric  
17  
18 therapy for presumed thrombosis). In addition, we performed pre-specified exploratory  
19  
20 analyses in hospitals with at least 25 detailed abstractions (n=14 hospitals) to examine  
21  
22 variation in patient characteristics, management and outcomes. Specifically, we  
23  
24 assessed variation in use of COVID-19 specific treatments (defined as  
25  
26 hydroxychloroquine, combination hydroxychloroquine plus azithromycin, Vitamin C [oral  
27  
28 or intravenous], IL-6 inhibitors or remdesivir), antibiotic therapy, use of organ support  
29  
30 (e.g., use of vasopressors, mechanical ventilation and CPR), occurrence of venous  
31  
32 thrombosis and in-hospital mortality.  
33  
34  
35  
36  
37

38 Descriptive statistics (e.g., mean, median, proportion) with measures of  
39  
40 dispersion (e.g., standard error, inter-quartile range [IQR]) were used to summarize  
41  
42 data. Data that were not documented in medical records (e.g., values of certain  
43  
44 laboratory tests) were reported as missing. Pairwise comparisons were made using t-  
45  
46 tests for continuous data and chi-square tests for categorical data, respectively.  
47  
48 Differences across hospitals were tested using the Kruskal–Wallis test for continuous  
49  
50 variables and Pearson chi-square test for categorical variables. All statistical tests were  
51  
52 two-sided with  $p < 0.05$  considered statistically significant. The study was reviewed by the  
53  
54  
55  
56  
57  
58  
59  
60

1  
2  
3 Institutional Review Board of the University of Michigan and deemed “not regulated”. It  
4 was not appropriate or possible to involve patients or the public in the design, or  
5  
6  
7  
8 conduct, or reporting, or dissemination plans of our research.  
9

## 10 11 12 **RESULTS**

### 13 14 **DEMOGRAPHIC DATA**

15  
16  
17 Demographic-only data from 1,593 COVID-19 positive and 1,259 PUI discharges  
18 from 32 Michigan hospitals were collected. PUIs had a median age of 64.4 years,  
19  
20  
21 52.6% were male and 32.0% Black. COVID-19 positive patients had similar age and  
22  
23  
24 gender as PUIs (63.9 years, and 52.1% male, respectively), but were more commonly  
25  
26  
27 Black (57.1% vs. 32.0%,  $p<0.01$ ). In the demographic-only cohort, 398 (25.0%) COVID-  
28  
29  
30 19 positive patients died during hospitalization.

31  
32 Detailed data were abstracted on 1,024 (64.3%) randomly-selected COVID-19  
33  
34  
35 positive patients. The most prevalent comorbidities were hypertension (65.4%),  
36  
37  
38 diabetes (36.8%), cardiovascular disease (26.0%) and chronic kidney disease (23.3%);  
39  
40  
41 14.9% of patients had no comorbidities. Though 12.8% of patients had a diagnosis of  
42  
43  
44 asthma and 11.2% had a diagnosis of chronic obstructive pulmonary disease, pre-  
45  
46  
47 hospital use of inhaled steroids, long-acting beta-agonists and long-acting  
48  
49  
50 antimuscarinic agents was low at 4.2%, 2.9%, and 0.5%, respectively. Current smoking  
51  
52  
53 or vaping was uncommon, but 27.3% were former smokers, and 35.8% reported former  
54  
55  
56 vaping. 115 (11.3%) patients were on immunosuppressive medications prior to  
57  
58  
59 hospitalization, including 62 (6.1%) who were on oral steroids. Essential workers  
60  
61  
62 comprised 12.8% of the cohort, including healthcare workers (7.0%) and service

1  
2  
3 workers (5.8%, e.g., postal, food service, transportation). Prior to admission, 16.1% of  
4  
5 patients resided in congregated living facilities, including nursing homes and homeless  
6  
7 shelters (**Table 1**).  
8  
9

## 10 11 12 **CLINICAL PRESENTATION AND INITIAL EVALUATION** 13

14  
15 In the detailed abstraction cohort (n=1,024), median duration of symptoms prior  
16  
17 to hospitalization was 6 days (IQR 3-9). The most common presenting symptoms were  
18  
19 cough (73.3%), fever (71.8%), and shortness of breath (72.2%); only 8% of patients did  
20  
21 not report one of these 3 complaints (**Table 1**). Gastrointestinal symptoms including  
22  
23 nausea, vomiting and diarrhea occurred in 39.4% of patients. Over a third of patients  
24  
25 (37.2%) reported sick contacts at the time of admission, and 23.8% reported contact  
26  
27 with a patient known to have COVID-19. The location of diagnostic testing for COVID-19  
28  
29 varied: 67.5% of patients were tested in hospital laboratories, 23.2% in commercial  
30  
31 laboratories, and 8.0% in the state laboratory. Patients were most commonly admitted  
32  
33 to a general medical/surgical ward (59.5%), but 15.7% were admitted to intermediate  
34  
35 care, 13.5% were admitted directly to ICU, and 11.3% were admitted to an observation  
36  
37 unit (**Figure 1**). A total of 419 (40.9%) of patients were admitted to a “cohorted”  
38  
39 (COVID-19 only) unit. At admission, 6.3% of patients had do not resuscitate/do not  
40  
41 intubate orders, which increased to 13.8% by discharge.  
42  
43  
44  
45  
46

47  
48 Common laboratory testing on admission included white blood cell count  
49  
50 (93.7%), absolute lymphocyte count (75.8%), troponin (57.4%), lactate (57.2%), CRP  
51  
52 (44.9%) and procalcitonin (42.4%) (missingness by laboratory test are reported in the e-  
53  
54 Appendix). Among those with available laboratory data, patients who received ICU  
55  
56  
57  
58  
59  
60

1  
2  
3 treatment had higher levels of inflammatory markers at admission including d-dimer  
4 (2.88mg/L vs. 1.65mg/L), ferritin (872ng/mL vs. 559ng/mL), CRP (24.3mg/dL vs.  
5 13.8mg/dL) and LDH (476U/L vs. 346U/L) (**Table 2**). Chest imaging (X-ray or CT) was  
6 performed in 528 (51.6%) patients within 1 day of admission and was more common in  
7 ICU than general care patients (59.9% vs 49.1%,  $p=0.004$ ). ICU patients were more  
8 likely to have radiographic abnormalities on presentation. Viral respiratory panels, blood  
9 cultures and sputum cultures were collected in 722 (51.0%) patients, but were positive  
10 in only 48 (4.7%) patients; 9.5% of ICU patients vs. 3.3% of general care patients had a  
11 viral or bacterial pathogen identified ( $p<0.001$ ).  
12  
13  
14  
15  
16  
17  
18  
19  
20  
21  
22  
23  
24  
25

## 26 **CRITICAL CARE TREATMENT**

27  
28 Overall, 232 patients (22.7%) were treated in an ICU, including 138 (13.5%) who  
29 were admitted directly to an ICU, and 94 (9.2%) who were transferred to ICU a median  
30 of 2 days following admission. Median length of ICU stay was 6 days (IQR 3-9), which  
31 was similar in survivors vs. non-survivors (5 vs 6 days,  $p=0.790$ ). Among 1,024 patients  
32 with detailed abstraction, the maximum respiratory support received was invasive  
33 mechanical ventilation in 161 patients (15.7%), non-invasive positive pressure  
34 ventilation in 15 (1.5%), heated high-flow nasal cannula in 60 (5.9%), oxygen mask  
35 (>40% FiO<sub>2</sub> or >6L/min) in 88 (8.6%), and nasal cannula oxygen (1-6L/min) in 441  
36 (43.1%) (**Table 3**). 259 (25.3%) patients received no respiratory support or oxygen  
37 therapy during hospitalization. Among 78 patients initiated on HHFNC, 13 (16.7%)  
38 progressed to invasive mechanical ventilation. Among 25 patients initiated on NIPPV,  
39  
40  
41  
42  
43  
44  
45  
46  
47  
48  
49  
50  
51  
52  
53  
54  
55  
56  
57  
58  
59  
60

1  
2  
3 10 (40.0%) progressed to invasive mechanical ventilation. An additional 12 patients and  
4  
5 2 patients, respectively, used HHFNC and NIPPV after extubation.  
6

7  
8 Upon initiation of mechanical ventilation, patients were predominantly treated  
9  
10 with a volume control mode (75%), with high FIO<sub>2</sub> (≥80% in 49.1% of ventilated  
11  
12 patients), and modest tidal volumes (median tidal volume 7.0 ml/kg predicted body  
13  
14 weight, [IQR 6.2-8.0]). The median duration of mechanical ventilation was 6 days (IQR  
15  
16 3-8 days). Prone positioning was documented in 18 patients, pulmonary vasodilators in  
17  
18 2 patients, and extra corporeal membrane oxygenation in 2 patients. CPR was  
19  
20 administered to 41 patients (4.0%), with only one patient surviving to hospital discharge.  
21  
22

23  
24 Vasopressors were used in 141 patients (13.8%), dialysis in 53 (5.2%), and  
25  
26 corticosteroids in 222 (21.7%) patients. 771 (75.3%) patients received broad-spectrum  
27  
28 antibiotics, with use being more common in the ICU than general wards (91.8% vs  
29  
30 70.5%, p<0.001).  
31  
32

### 33 34 35 **COVID-19 SPECIFIC THERAPIES** 36

37  
38 A total of 747 (72.9%) patients were treated with therapies targeting COVID-19,  
39  
40 or the body's response to COVID-19, most commonly hydroxychloroquine (51%),  
41  
42 hydroxychloroquine plus azithromycin (36%), and Vitamin C (10%). Treatment with IL-6  
43  
44 inhibitors and remdesivir was infrequent (27 and 17 patients, respectively). Use of  
45  
46 COVID-19 treatments was more common in ICU than general care patients (88% vs.  
47  
48 69%, p<0.001). No patients in our sample received convalescent plasma. The  
49  
50 proportion of patients treated with COVID-19 specific therapies decreased over time  
51  
52 from 78.1% of patients admitted during March 8 to March 31 to 65.0% of patients  
53  
54  
55  
56  
57  
58  
59  
60



1  
2  
3 admitted during April 1 to May 11 ( $p < 0.001$ ). Only 21 (2.0%) patients were enrolled into  
4  
5 a clinical trial (**Table 2**).  
6  
7  
8  
9

## 10 **CLINICAL OUTCOMES**

11  
12 The in-hospital mortality rate for the full cohort of COVID-19 positive patients  
13 (demographic plus detailed abstractions) was 25.0%. Mortality varied by decade of age,  
14 ranging from 4.5% among patients aged 30-39 to 37.5% in patients aged 70-79 years  
15 (**Figure 2**). Among 219 decedents with detailed abstraction, 134 (61.5%) died following  
16 ICU treatment and 114 (52.1%) died after receiving mechanical ventilation. 40 of 219  
17 decedents (18.3%) received cardiopulmonary resuscitation, and 91 (41.6%) were  
18 transitioned to comfort care prior to death. The most common causes of death were  
19 refractory hypoxemia (29.4%), cardiac arrhythmia (15.9%) and refractory shock  
20 (10.7%). Venous thromboembolism occurred in 32 (3.1%) of patients, of which 9  
21 experienced proximal lower-extremity DVT, 21 experienced PE, and 2 experienced both  
22 DVT and PE.  
23  
24  
25  
26  
27  
28  
29  
30  
31  
32  
33  
34  
35  
36

37 Among the 805 patients that survived to hospital discharge, 86% were  
38 discharged home and 8% were discharged to a skilled nursing facility or rehabilitation  
39 center. Only 1 patient (0.1%) was discharged to the Detroit field hospital (**Table 3**).  
40  
41  
42  
43  
44  
45  
46

## 47 **VARIATION ACROSS HOSPITALS**

48  
49 Among 14 hospitals with at least 25 detailed abstractions, substantial variation in  
50 demographics, illness severity, care processes, treatments, and outcomes of COVID-19  
51 positive patients were observed (**Table 4**). The proportion of patients over 65 years of  
52  
53  
54  
55  
56  
57  
58  
59  
60

1  
2  
3 age ranged from 30.2% to 65.5%, while the proportion of Black patients ranged from 0%  
4  
5 to 94.6%. Similarly, the proportion of patients admitted directly to an ICU ranged from  
6  
7 0% to 43.8%, while the proportion of patients who were transferred to an ICU after  
8  
9 admission ranged from 0% to 24.1%. Treatment in “cohorted” units ranged from 0% to  
10  
11 100%. Mechanical ventilation on admission ranged from 0% to 12.8% while use of  
12  
13 vasopressors on admission ranged from 0% to 14.8% across hospitals. Critical illness  
14  
15 on presentation (defined as admission to an ICU with receipt of vasopressors or  
16  
17 mechanical ventilation on admission) varied from 0% to 7.7%.

21  
22 72.9% of patients received at least one COVID-19 specific therapy (e.g.,  
23  
24 hydroxychloroquine, hydroxychloroquine plus azithromycin, interleukin-6 inhibitor,  
25  
26 antiviral therapy), but use varied from 32% to 96.3% across sites. Similarly, 65% of  
27  
28 patients received concurrent antibiotics and COVID-19 specific treatment during  
29  
30 hospitalization, with frequency varying from 50% to 100% in ICU patients vs. 17% to  
31  
32 95% in general care patients.

35  
36 Mortality across hospitals varied from 7.9% to 45.7% of patients, and rates of  
37  
38 CPR before death ranged from 0% to 66.7%. Finally, rates of VTE also varied, occurring  
39  
40 in 0 to 11% of patients across hospitals.

## 44 45 **DISCUSSION**

46  
47 While reports of COVID-19 patients from New York, Washington, and California  
48  
49 exist,<sup>7-9</sup> this is the first multi-center study to examine epidemiology, treatment and  
50  
51 outcomes of COVID-19 hospitalizations in Michigan. Also, in contrast to prior multi-  
52  
53  
54  
55  
56  
57  
58  
59  
60

1  
2  
3 hospital US cohorts, the Mi-COVID19 registry includes a large sample of patients  
4  
5 treated at a diverse set of 32 academic and community hospitals.  
6  
7

8 The demographics of our cohort differ from other cohorts. First, patients with  
9  
10 confirmed COVID-19 in Michigan are disproportionately Black (over half of our cohort).  
11  
12 This is in contrast to 32% of PUIs—indicating that the predominance of black patients  
13  
14 with COVID-19 is not a reflection of local demographics, but rather disproportionate  
15  
16 impact of COVID-19 on black patients. Second, in contrast to prior studies,<sup>1 7 10</sup> our  
17  
18 cohort was nearly 50:50 male:female, rather than male dominant. The reasons for this  
19  
20 difference are unclear.  
21  
22

23  
24 Consistent with prior reports, the main presenting symptoms were cough,  
25  
26 dyspnea and fever. Similar to other studies,<sup>11</sup> a substantial proportion of patients had  
27  
28 multiple comorbidities; but notably, 15% of our cohort had no known medical  
29  
30 problems.<sup>12</sup> We found that a substantial proportion of patients reported contact with a  
31  
32 known COVID-19 positive patient prior to developing symptoms. These findings mirror  
33  
34 those of a study from Shenzhen, China, where contacts of those with disease  
35  
36 experienced a significantly higher rate of infection than the general public.<sup>13</sup> Additionally,  
37  
38 patients underwent COVID-19 testing through a number of venues including hospital,  
39  
40 commercial and state-run laboratories, illustrating the myriad ways in which diagnosis  
41  
42 was obtained early in the outbreak when testing was limited.<sup>14</sup> Although only 14% of the  
43  
44 sample was admitted directly to an ICU, an additional 9% were transferred to an ICU  
45  
46 later in hospitalization. Hospital mortality in cases with detailed abstractions was 21%,  
47  
48 but increased with age, consistent with prior studies.<sup>15</sup>  
49  
50  
51  
52  
53  
54  
55  
56  
57  
58  
59  
60

1  
2  
3 A key finding of our study is that a majority of patients hospitalized for COVID-19  
4 were treated with therapies intended to mitigate SARS-CoV-2 viral replication or the  
5 body's immune response. More than half of patients were treated with  
6 hydroxychloroquine, and an additional 6% were treated with antivirals or immune  
7 modulating agents. Experts have increasingly questioned the use of unproven COVID-  
8 19 therapies outside of a clinical trial,<sup>16</sup> and have argued that supportive care and trial  
9 enrollment are the best options until data regarding efficacy of therapies accrues.<sup>17 18</sup>  
10 Accumulating observational and trial data now suggest no benefit from  
11 hydroxychloroquine,<sup>19-21</sup> and concerns regarding harm from empiric use remain.<sup>22</sup>  
12 Unfortunately, only 2% of our sample was enrolled in clinical trials. The high rate of  
13 experimental COVID-19 therapies outside empiric studies represents a lost opportunity  
14 for learning. It is also emblematic of the strong desire—particularly early in the  
15 pandemic—to use therapies with a theoretical potential to target the virus even though  
16 improved survival from critical illness is largely attributed to improvements in supportive  
17 care.<sup>23</sup> Notably, we still do not have targeted therapies for sepsis or acute respiratory  
18 distress syndrome, which are the major mechanisms by which patients die from COVID-  
19 19 infection.

20  
21  
22  
23  
24  
25  
26  
27  
28  
29  
30  
31  
32  
33  
34  
35  
36  
37  
38  
39  
40  
41  
42 Another strength of our study is the variation in clinical presentation and  
43 outcomes we observed across a heterogeneous sample of hospitals. Use of COVID-19  
44 specific treatments, corticosteroids, and antibiotics varied markedly across hospitals.  
45 While we are unable to ascertain reasons for such variation, we anecdotally observed  
46 that practice evolved across hospitals over time. For example, at some Michigan  
47 hospitals, routine use of hydroxychloroquine was common in the first few weeks of the  
48  
49  
50  
51  
52  
53  
54  
55  
56  
57  
58  
59  
60

1  
2  
3 pandemic but curbed as trial data became available. In contrast, use of  
4  
5 hydroxychloroquine continues to be encouraged at other hospitals even today.<sup>24</sup> While it  
6  
7 is unclear if these practice changes influenced outcomes, future studies exploring the  
8  
9 rationale and impact of these changes on patients will be valuable.  
10  
11

12 Our study has limitations. First, given the observational nature of the study,  
13  
14 rationales for treatment or management decisions cannot be determined. Second,  
15  
16 because our sampling frame included patients that were discharged or deceased, our  
17  
18 findings may be biased as patients who remain hospitalized may not be included in our  
19  
20 cohort (potentially explaining lower duration of mechanical ventilation and hospital stay).  
21  
22 However, COVID-19 hospitalizations in Southeastern Michigan have been declining  
23  
24 since mid-April—limiting the degree of bias from exclusion of patients still in the  
25  
26 hospital. Third, while variation in care was observed, the implications of such variability  
27  
28 on clinical outcomes is unknown. Nevertheless, given that therapeutic modalities are  
29  
30 scarce and not without risks, reducing variation may improve patient safety and  
31  
32 resource use. Fourth, our study depends on available documentation, so symptoms,  
33  
34 comorbidities, or treatments not documented in the medical record may be omitted. For  
35  
36 example, it is possible that the low use of prone positioning observed in our cohort may  
37  
38 be due to incomplete documentation of this practice. Finally, we did not collect patient  
39  
40 identifiers, so inter-hospital transfers could be reported as two separate hospitalizations.  
41  
42 However, we did collect admission and discharge locations, and only 6% of the cohort  
43  
44 was transferred from another hospital.  
45  
46  
47  
48  
49

50  
51 Our study also has strengths. Ours is the first multi-hospital study to examine  
52  
53 clinical aspects related to COVID-19 in Michigan. Through a rigorous data collection  
54  
55  
56  
57  
58  
59  
60

1  
2  
3 structure including a well-defined sampling strategy and trained data abstractors, we  
4  
5 provide novel and detailed insights into clinical care during the pandemic. Second, we  
6  
7 were able to examine variation across sites finding substantial differences in clinical  
8  
9 care and outcomes across hospitals. To our knowledge, this is the first study to examine  
10  
11 differences in these important care processes, treatment approaches and outcomes  
12  
13 across sites. Third, we report a high rate of use of non-evidence-based therapies for  
14  
15 treating COVID-19. This finding has significant safety, economic and policy implications  
16  
17 for the most critically ill subsets in the hospital. Finally, data collection for this effort  
18  
19 remains ongoing, including longitudinal monitoring of patients after discharge. These  
20  
21 data will help shed new light on the post hospital sequelae of COVID-19.  
22  
23  
24  
25

26 Michigan remains one of the regions most affected by COVID-19. This multi-  
27  
28 center study provides granular clinical data regarding patients, care practices and  
29  
30 clinical outcomes in the state. The wide variation in observed practices and outcomes  
31  
32 suggests caution when interpreting findings from single center studies. Our study also  
33  
34 demonstrates the value of hospital collaboratives to help inform best practices.  
35  
36  
37  
38  
39  
40  
41  
42  
43  
44  
45  
46  
47  
48  
49  
50  
51  
52  
53  
54  
55  
56  
57  
58  
59  
60

**BIBLIOGRAPHY**

1. Guan WJ, Ni ZY, Hu Y, et al. Clinical Characteristics of Coronavirus Disease 2019 in China. *N Engl J Med* 2020 doi: 10.1056/NEJMoa2002032 [published Online First: 2020/02/29]
2. Zhu N, Zhang D, Wang W, et al. A Novel Coronavirus from Patients with Pneumonia in China, 2019. *N Engl J Med* 2020;382(8):727-33. doi: 10.1056/NEJMoa2001017 [published Online First: 2020/01/25]
3. COVID-19 Dashboard by the Center for Systems Science and Engineering (CSSE) at Johns Hopkins University. Available online at: <https://coronavirus.jhu.edu/maphtml> Accessed April 20, 2020
4. Centers for Disease Control Cases of Coronavirus Disease (COVID-19) in the US. Available online at: <https://www.cdc.gov/coronavirus/2019-ncov/cases-updates/cases-in-us.html>. Accessed April 20, 2020.
5. Michigan.gov. Coronavirus Resources - Confirmed cases by Jurisdiction. Available online at: <https://www.michigan.gov/coronavirus/0,9753,7-406-98163-520743--00.html>. Accessed April 20, 2020.
6. Blue Cross Blue Shield Collaborative Quality Initiatives. Available online at: <https://www.bcbsm.com/providers/value-partnerships/collaborative-quality-initiatives.html>. Accessed April 20, 2020.

- 1  
2  
3 7. Goyal P, Choi JJ, Pinheiro LC, et al. Clinical Characteristics of Covid-19 in New York  
4  
5 City. *N Engl J Med* 2020 doi: 10.1056/NEJMc2010419 [published Online First:  
6  
7 2020/04/18]  
8  
9
- 10 8. Bhatraju PK, Ghassemieh BJ, Nichols M, et al. Covid-19 in Critically Ill Patients in the  
11  
12 Seattle Region - Case Series. *N Engl J Med* 2020 doi: 10.1056/NEJMoa2004500  
13  
14 [published Online First: 2020/04/01]  
15  
16
- 17 9. Myers LC, Parodi SM, Escobar GJ, et al. Characteristics of Hospitalized Adults With  
18  
19 COVID-19 in an Integrated Health Care System in California. *JAMA* 2020 doi:  
20  
21 10.1001/jama.2020.7202 [published Online First: 2020/04/25]  
22  
23
- 24 10. Grasselli G, Zangrillo A, Zanella A, et al. Baseline Characteristics and Outcomes of  
25  
26 1591 Patients Infected With SARS-CoV-2 Admitted to ICUs of the Lombardy  
27  
28 Region, Italy. *JAMA* 2020 doi: 10.1001/jama.2020.5394 [published Online First:  
29  
30 2020/04/07]  
31  
32
- 33 11. Xie J, Tong Z, Guan X, et al. Clinical Characteristics of Patients Who Died of  
34  
35 Coronavirus Disease 2019 in China. *JAMA Netw Open* 2020;3(4):e205619. doi:  
36  
37 10.1001/jamanetworkopen.2020.5619 [published Online First: 2020/04/11]  
38  
39
- 40 12. Gold JAW, Wong KK, Szablewski CM, et al. Characteristics and Clinical Outcomes  
41  
42 of Adult Patients Hospitalized with COVID-19 - Georgia, March 2020. *MMWR*  
43  
44 *Morb Mortal Wkly Rep* 2020;69(18):545-50. doi: 10.15585/mmwr.mm6918e1  
45  
46 [published Online First: 2020/05/08]  
47  
48
- 49 13. Bi Q, Wu Y, Mei S, et al. Epidemiology and transmission of COVID-19 in 391 cases  
50  
51 and 1286 of their close contacts in Shenzhen, China: a retrospective cohort  
52  
53  
54  
55  
56  
57  
58  
59  
60



- 1  
2  
3 study. *Lancet Infect Dis* 2020 doi: 10.1016/S1473-3099(20)30287-5 [published  
4  
5 Online First: 2020/05/01]  
6  
7
- 8 14. Sharfstein JM, Becker SJ, Mello MM. Diagnostic Testing for the Novel Coronavirus.  
9  
10 *JAMA* 2020 doi: 10.1001/jama.2020.3864 [published Online First: 2020/03/10]  
11
- 12 15. Richardson S, Hirsch JS, Narasimhan M, et al. Presenting Characteristics,  
13  
14 Comorbidities, and Outcomes Among 5700 Patients Hospitalized With COVID-19  
15  
16 in the New York City Area. *JAMA* 2020 doi: 10.1001/jama.2020.6775 [published  
17  
18 Online First: 2020/04/23]  
19  
20
- 21 16. Bhimraj A, Morgan RL, Shumaker AH, et al. Infectious Diseases Society of America  
22  
23 Guidelines on the Treatment and Management of Patients with COVID-19. *Clin*  
24  
25 *Infect Dis* 2020 doi: 10.1093/cid/ciaa478 [published Online First: 2020/04/28]  
26  
27
- 28 17. Rice TW, Janz DR. In Defense of Evidence-Based Medicine for the Treatment of  
29  
30 COVID-19 ARDS. *Ann Am Thorac Soc* 2020 doi: 10.1513/AnnalsATS.202004-  
31  
32 325IP [published Online First: 2020/04/23]  
33  
34
- 35 18. Waterer GW, Rello J, Wunderink RG. SARS-CoV-2: First Do No Harm. *Am J Respir*  
36  
37 *Crit Care Med* 2020 doi: 10.1164/rccm.202004-1153ED [published Online First:  
38  
39 2020/04/21]  
40  
41
- 42 19. Tang W, Cao Z, Han M, et al. Hydroxychloroquine in patients with mainly mild to  
43  
44 moderate coronavirus disease 2019: open label, randomised controlled trial. *BMJ*  
45  
46 2020;369:m1849. doi: 10.1136/bmj.m1849 [published Online First: 2020/05/16]  
47  
48
- 49 20. Mahevas M, Tran VT, Roumier M, et al. Clinical efficacy of hydroxychloroquine in  
50  
51 patients with covid-19 pneumonia who require oxygen: observational  
52  
53  
54  
55  
56  
57  
58  
59  
60

- 1  
2  
3 comparative study using routine care data. *BMJ* 2020;369:m1844. doi:  
4 10.1136/bmj.m1844 [published Online First: 2020/05/16]  
5  
6  
7  
8 21. Rosenberg ES, Dufort EM, Udo T, et al. Association of Treatment With  
9  
10 Hydroxychloroquine or Azithromycin With In-Hospital Mortality in Patients With  
11  
12 COVID-19 in New York State. *JAMA* 2020 doi: 10.1001/jama.2020.8630  
13  
14 [published Online First: 2020/05/12]  
15  
16  
17 22. Bessiere F, Rocchia H, Deliniere A, et al. Assessment of QT Intervals in a Case  
18  
19 Series of Patients With Coronavirus Disease 2019 (COVID-19) Infection Treated  
20  
21 With Hydroxychloroquine Alone or in Combination With Azithromycin in an  
22  
23 Intensive Care Unit. *JAMA Cardiol* 2020 doi: 10.1001/jamacardio.2020.1787  
24  
25 [published Online First: 2020/05/02]  
26  
27  
28 23. Angus DC. Optimizing the Trade-off Between Learning and Doing in a Pandemic.  
29  
30 *JAMA* 2020 doi: 10.1001/jama.2020.4984 [published Online First: 2020/04/01]  
31  
32  
33 24. Wells K. Hospitals Vary Treatment for Coronavirus Patients. *National Public Radio*  
34  
35 2020; Available online at: [https://www.npr.org/2020/05/18/857727140/hospitals-](https://www.npr.org/2020/05/18/857727140/hospitals-vary-treatment-for-coronavirus-patients)  
36  
37 [vary-treatment-for-coronavirus-patients](https://www.npr.org/2020/05/18/857727140/hospitals-vary-treatment-for-coronavirus-patients). Accessed May 19, 2020.  
38  
39  
40  
41  
42  
43  
44  
45  
46  
47  
48  
49  
50  
51  
52  
53  
54  
55  
56  
57  
58  
59  
60

**Table 1. Demographic and Clinical Characteristics of COVID-19 Positive Patients (n=1,024)**

|                                              |                                          |                  |
|----------------------------------------------|------------------------------------------|------------------|
| Residence prior to hospitalization - no. (%) |                                          |                  |
|                                              | Home                                     | 824 (80.5%)      |
|                                              | Congregated living facility <sup>1</sup> | 165 (16.1%)      |
|                                              | Sub-acute rehabilitation facility        | 9 (0.9%)         |
|                                              | Unknown                                  | 18 (1.8%)        |
| Admission location - no. (%)                 |                                          |                  |
|                                              | Emergency department                     | 951 (92.9%)      |
|                                              | Transfer from Another Hospital           | 60 (5.9%)        |
|                                              | Direct admission                         | 7 (0.7%)         |
| Median age (IQR) - yr                        |                                          | 63.3 (50.9-74.4) |
| Male Sex - no. (%)                           |                                          | 533 (52.1%)      |
| Race - no. (%)                               |                                          |                  |
|                                              | Black                                    | 526 (51.4%)      |
|                                              | White                                    | 390 (38.1%)      |
|                                              | Unknown                                  | 45 (4.4%)        |
|                                              | Asian                                    | 30 (2.9%)        |
|                                              | Other                                    | 26 (2.5%)        |
|                                              | Native                                   | 4 (0.4%)         |
|                                              | Islander                                 | 3 (0.3%)         |
| Ethnicity - no. (%)                          |                                          |                  |
|                                              | Non-Hispanic                             | 873 (85.3%)      |
|                                              | Hispanic                                 | 30 (2.9%)        |
|                                              | Unknown                                  | 117 (11.4%)      |
| Insurance – no. (%)                          |                                          |                  |
|                                              | Medicare                                 | 497 (48.5%)      |
|                                              | Commercial                               | 251 (24.5%)      |
|                                              | Medicaid                                 | 128 (12.5%)      |
|                                              | Self-pay                                 | 29 (2.8%)        |
|                                              | Other <sup>2</sup>                       | 117 (11.4%)      |
| BMI - median (IQR)                           |                                          | 30.6 (25.9-37.1) |
| Smoking history - no. (%)                    |                                          |                  |
|                                              | Never                                    | 615 (60.2%)      |
|                                              | Former                                   | 279 (27.3%)      |
|                                              | Current                                  | 61 (6.0%)        |
|                                              | Unknown                                  | 65 (6.4%)        |
| Vaping history - no. (%)                     |                                          |                  |
|                                              | Never                                    | 645 (63.2%)      |
|                                              | Former                                   | 366 (35.8%)      |
|                                              | Current                                  | 6 (0.6%)         |
|                                              | Unknown                                  | 3 (0.3%)         |
| Coexisting disorder - no. (%)                |                                          |                  |
|                                              | Hypertension                             | 670 (65.4%)      |
|                                              | Diabetes                                 | 377 (36.8%)      |
|                                              | Cardiovascular Disease                   | 266 (26.0%)      |
|                                              | Moderate/ Severe Kidney Disease          | 239 (23.3%)      |
|                                              | Asthma                                   | 132 (12.9%)      |
|                                              | CHF/Cardiomyopathy                       | 131 (12.8%)      |
|                                              | Dementia                                 | 123 (12.0%)      |
|                                              | Chronic Obstructive Pulmonary Disease    | 115 (11.2%)      |
|                                              | Cerebrovascular disease/ paraplegia      | 97 (9.5%)        |

|    |                                                            |             |
|----|------------------------------------------------------------|-------------|
| 1  |                                                            |             |
| 2  |                                                            |             |
| 3  | Cancer <sup>3</sup>                                        | 77 (7.5%)   |
| 4  | Peripheral Vascular Disorders                              | 41 (4.0%)   |
| 5  | Chronic Pulmonary Disease (non-asthma/COPD)                | 35 (3.4%)   |
| 6  | Rheumatoid Arthritis                                       | 29 (2.8%)   |
| 7  | Peptic Ulcer Disease                                       | 10 (1.0%)   |
| 8  | HIV/AIDS                                                   | 7 (0.7%)    |
| 9  | Organ transplant                                           | 8 (0.8%)    |
| 10 | Inflammatory Bowel Disease                                 | 8 (0.8%)    |
| 11 | No reported comorbidities                                  | 152 (14.9%) |
| 12 | Home Medications                                           |             |
| 13 | ACE Inhibitors                                             | 180 (17.6%) |
| 14 | Steroids/immunosuppressive therapy                         | 115 (11.3%) |
| 15 | ARBs                                                       | 136 (13.3%) |
| 16 | NSAIDs                                                     | 182 (17.8%) |
| 17 | Statins                                                    | 378 (37.0%) |
| 18 | Beta Blockers                                              | 298 (29.2%) |
| 19 | Anticoagulants                                             | 149 (14.6%) |
| 20 | Oral Steroids <sup>4</sup>                                 | 62 (6.1%)   |
| 21 | Inhaled steroids                                           | 43 (4.2%)   |
| 22 | Inhaled long-acting beta-agonist                           | 30 (2.9%)   |
| 23 | Inhaled long-acting anti-cholinergic                       | 5 (0.5%)    |
| 24 | Home oxygen therapy                                        | 36 (3.5%)   |
| 25 | Duration of symptoms before admission, days - median (IQR) | 6 (3-9)     |
| 26 | Respiratory symptoms - no. (%)                             |             |
| 27 | Cough (New or Worsening)                                   | 751 (73.3%) |
| 28 | Fever - no. (%)                                            | 735 (71.8%) |
| 29 | Fever (99.0 - 100.4 [F])                                   | 151 (14.7%) |
| 30 | Fever ( >100.4 [F])                                        | 390 (38.1%) |
| 31 | Subjective fever                                           | 194 (18.9%) |
| 32 | Dyspnea / shortness of breath                              | 739 (72.2%) |
| 33 | Nausea/vomiting or diarrhea                                | 403 (39.4%) |
| 34 | Fatigue                                                    | 361 (35.3%) |
| 35 | Myalgias                                                   | 264 (25.8%) |
| 36 | Weakness                                                   | 253 (24.7%) |
| 37 | Sputum production                                          | 146 (14.3%) |
| 38 | Altered Mental Status                                      | 144 (14.1%) |
| 39 | Non-pleuritic chest pain                                   | 100 (9.8%)  |
| 40 | Generalized malaise                                        | 91 (8.9%)   |
| 41 | Rhinorrhea                                                 | 75 (7.3%)   |
| 42 | Pleuritic chest pain                                       | 75 (7.3%)   |
| 43 | No reported symptoms                                       | 14 (1.4%)   |
| 44 | Sick contacts - no. (%)                                    | 381 (37.2%) |
| 45 | Known COVID-19 positive                                    | 244 (23.8%) |
| 46 | Unknown COVID-19 status                                    | 236 (23.0%) |
| 47 | Healthcare worker - no. (%)                                | 72 (7.0%)   |
| 48 | Service worker - no. (%) <sup>5</sup>                      | 59 (5.8%)   |
| 49 | Initial location of admission - no. (%)                    |             |
| 50 | General Medical/Surgical ward                              | 608 (59.5%) |
| 51 | ICU                                                        | 138 (13.5%) |
| 52 | Step-down unit                                             | 160 (15.7%) |
| 53 | Observation unit                                           | 115 (11.3%) |
| 54 | Missing/Unknown                                            | 3 (0.3%)    |
| 55 | Admitted to COVID-19 specific (i.e., cohorted) unit        | 419 (40.9%) |
| 56 |                                                            |             |
| 57 |                                                            |             |
| 58 |                                                            |             |
| 59 |                                                            |             |
| 60 |                                                            |             |

| <i>Advanced Directives on admission</i> |                        |           |
|-----------------------------------------|------------------------|-----------|
|                                         | DNR/DNI                | 64 (6.3%) |
|                                         | No CPR (intubation OK) | 19 (1.9%) |
|                                         | No intubation (CPR OK) | 3 (0.3%)  |

Abbreviations: COVID-19, coronavirus disease 2019; SE=standard error; IQR, inter-quartile range

<sup>1</sup> Includes assisted living, group home, skilled nursing facility, and homeless shelters, correctional facilities, community living and inpatient psychiatric facilities.

<sup>2</sup> Includes other payers, Michigan, out-of-state and government.

<sup>3</sup> Includes leukemia, lymphoma, hematologic cancer and any malignancy.

<sup>4</sup> Includes oral prednisone, prednisolone, hydrocortisone and dexamethasone.

<sup>5</sup> Service workers include food service, transportation, postal/delivery and other related fields.

**Table 2 – Clinical and Laboratory Data in COVID-19 Positive Patients by ICU-status (n=1,024)**

|                                                                     | Ever ICU<br>(n = 232) | General Ward<br>(n = 792) | p      |
|---------------------------------------------------------------------|-----------------------|---------------------------|--------|
| <b>Vital signs on day of hospital admission, no. (%)</b>            |                       |                           |        |
| Fever (>100.4 [F])                                                  | 95 (40.9%)            | 295 (37.2%)               | 0.3073 |
| Hypoxia / new or escalated O2 requirement                           | 142 (61.2%)           | 257 (32.4%)               | <.0001 |
| Supplemental oxygen use                                             | 96 (41.4%)            | 145 (18.3%)               | <.0001 |
| Respiratory rate > 20                                               | 139 (59.9%)           | 306 (38.6%)               | <.0001 |
| Heart rate > 100 per minute                                         | 99 (42.7%)            | 321 (40.5%)               | 0.5596 |
| Systolic blood pressure < 100 mmHg                                  | 27 (11.6%)            | 45 (5.7%)                 | 0.0018 |
| <b>Day 1 laboratory measures, median (IQR)</b>                      |                       |                           |        |
| Hemoglobin                                                          | 13.2 (11.4-14.7)      | 13.2 (12.0-14.6)          | 0.4573 |
| White blood cell count, K/uL                                        | 7.3 (5.5-9.7)         | 6.5 (4.8-8.4)             | <.0001 |
| Absolute lymphocyte count, K/uL                                     | 0.80 (0.60-1.20)      | 1.00 (0.70-1.30)          | 0.3440 |
| Platelet count, K/uL                                                | 197 (149-256)         | 204 (159-268)             | 0.4875 |
| ALT, IU/L                                                           | 32.0 (20.0-60.0)      | 27.0 (18.0-41.0)          | 0.2228 |
| Lactate, mmol/L                                                     | 1.6 (1.2-2.5)         | 1.4 (1.0-1.8)             | 0.0010 |
| Troponin pg/mL                                                      | 9 (0-38)              | 0 (0-12)                  | 0.5872 |
| Brain Natriuretic Peptide (BNP), pg/mL                              | 79 (34-236)           | 49 (18-157)               | 0.0088 |
| Procalcitonin, ng/mL                                                | 0.30 (0.17-0.94)      | 0.12 (0.06-0.29)          | 0.5054 |
| D-dimer, mg/L                                                       | 2.88 (1.19-35.00)     | 1.65 (0.59-368.00)        | 0.8240 |
| Ferritin, ng/mL                                                     | 872 (379-1531)        | 559 (237-1019)            | 0.1074 |
| CRP, mg/dL                                                          | 24.3 (12.0-107.1)     | 13.8 (5.8-66.2)           | 0.0031 |
| LDH, IU/L                                                           | 476 (337-668)         | 346 (254-455)             | <.0001 |
| Creatinine, mg/dL                                                   | 1.3 (1.0-2.0)         | 1.1 (0.8-1.5)             | 0.5736 |
| Total Bilirubin, mg/dL                                              | 0.6 (0.4-0.9)         | 0.5 (0.4-0.8)             | 0.7147 |
| Respiratory viral panel positive for non-COVID-19 respiratory virus | 2 (0.9%)              | 7 (0.9%)                  | 0.9443 |
| Positive blood culture within 1 day of admission                    | 7 (3.0%)              | 9 (1.1%)                  | 0.0422 |
| Positive respiratory culture within 1 day of admission              | 4 (1.7%)              | 4 (0.5%)                  | 0.0636 |
| Any Chest imaging <sup>1</sup>                                      | 139 (59.9%)           | 389 (49.1%)               | 0.0038 |
| Chest X-ray                                                         | 118 (50.9%)           | 322 (40.7%)               | 0.0058 |
| Chest Computed Tomography                                           | 34 (14.7%)            | 106 (13.4%)               | 0.6201 |
| <b>Imaging findings - no. (%)</b>                                   |                       |                           |        |
| Pneumonia                                                           | 61 (26.3%)            | 100 (12.6%)               | <.0001 |
| Non-specified opacities/air-space disease                           | 84 (36.2%)            | 161 (20.3%)               | <.0001 |
| Pleural effusion                                                    | 32 (13.8%)            | 37 (4.7%)                 | <.0001 |
| Normal/no abnormalities                                             | 5 (2.2%)              | 30 (3.8%)                 | 0.2287 |
| Pulmonary Edema                                                     | 25 (10.8%)            | 29 (3.7%)                 | <.0001 |
| CT with Ground Glass Infiltrates                                    | 14 (6.0%)             | 58 (7.3%)                 | 0.4995 |

| <b>Respiratory support on day of admission - no. (%)</b>                                                   |                                             |             |             |        |
|------------------------------------------------------------------------------------------------------------|---------------------------------------------|-------------|-------------|--------|
|                                                                                                            | Invasive mechanical ventilation             | 46 (19.8%)  | 2 (0.3%)    | <.0001 |
|                                                                                                            | Non-invasive positive pressure              | 5 (2.2%)    | 2 (0.3%)    | 0.0020 |
|                                                                                                            | HHFNC                                       | 5 (2.2%)    | 5 (2.2%)    | 0.1905 |
|                                                                                                            | Oxygen mask (>40% <i>fio</i> <sub>2</sub> ) | 17 (7.3%)   | 20 (2.6%)   | 0.0006 |
|                                                                                                            | Nasal cannula oxygen, 1-6L                  | 76 (32.8%)  | 261 (33.0%) | 0.9555 |
|                                                                                                            | No supplemental oxygen                      | 83 (8.1%)   | 502 (49.0%) | <.0001 |
| <b>Treatments during hospitalization - no. (%)</b>                                                         |                                             |             |             |        |
| <i>Covid-19 Specific treatment(s)</i>                                                                      |                                             |             |             |        |
|                                                                                                            | Hydroxychloroquine                          | 154 (66.4%) | 364 (46.0%) | <.0001 |
|                                                                                                            | Hydroxychloroquine + Azithromycin           | 112 (48.3%) | 260 (32.8%) | <.0001 |
|                                                                                                            | Vitamin C (PO or IV)                        | 35 (15.1%)  | 68 (8.6%)   | 0.0038 |
|                                                                                                            | Remdesivir                                  | 7 (3.0%)    | 10 (1.3%)   | 0.0658 |
|                                                                                                            | IL-6 receptor inhibitor                     | 27 (11.6%)  | . (.%)      | <.0001 |
|                                                                                                            | <i>Corticosteroids</i> <sup>2</sup>         | 79 (34.1%)  | 143 (18.1%) | <.0001 |
|                                                                                                            | <i>Antibiotics</i>                          | 213 (91.8%) | 558 (70.5%) | <.0001 |
|                                                                                                            | Azithromycin                                | 149 (64.2%) | 415 (52.4%) | 0.0014 |
|                                                                                                            | Ceftriaxone                                 | 124 (53.4%) | 345 (43.6%) | 0.0079 |
|                                                                                                            | Cefepime                                    | 90 (38.8%)  | 79 (10.0%)  | <.0001 |
|                                                                                                            | Doxycycline                                 | 37 (15.9%)  | 111 (14.0%) | 0.4615 |
|                                                                                                            | Vancomycin                                  | 115 (49.6%) | 106 (13.4%) | <.0001 |
|                                                                                                            | Linezolid                                   | 12 (5.2%)   | 8 (1.0%)    | <.0001 |
|                                                                                                            | Anti-pseudomonals <sup>3</sup>              | 123 (53.0%) | 115 (14.5%) | <.0001 |
|                                                                                                            | <i>Antivirals</i> <sup>4</sup>              | 1 (0.4%)    | 13 (1.6%)   | 0.1626 |
|                                                                                                            | <i>Enrolled in clinical trial</i>           | 10 (4.3%)   | 12 (1.5%)   | 0.0098 |
| Abbreviations: COVID-19=coronavirus disease 2019; HHFNC=heated high flow nasal cannula; SE=standard error. |                                             |             |             |        |
| 1 Includes chest imaging results 7 days before hospital encounter                                          |                                             |             |             |        |
| 2 Hydrocortisone, Methylprednisolone, prednisolone or prednisone                                           |                                             |             |             |        |
| 3 Cefepime, gentamicin, imipenem, meropenem, piperacillin-tazobactam, ceftazadime, aztreonam or tobramycin |                                             |             |             |        |
| 4 Non-remdesivir antivirals including Oseltamivir, Lopinavir/Ritonavir, Ribavirin, others                  |                                             |             |             |        |



**Table 3. Organ support for COVID-19 Positive Patients by Discharge Status (n=1,024)**

|                                                                                                                                                                                                                                                                                                                                                                         | All patients<br>(n =1,024) | Discharged<br>Alive<br>n = 805 | Died in<br>Hospital<br>n = 219 |
|-------------------------------------------------------------------------------------------------------------------------------------------------------------------------------------------------------------------------------------------------------------------------------------------------------------------------------------------------------------------------|----------------------------|--------------------------------|--------------------------------|
| Treated in an ICU                                                                                                                                                                                                                                                                                                                                                       | 232 (22.7%)                | 101 (12.5%)                    | 131 (59.8%)                    |
| <i>Respiratory support ever received, no. (%)*</i>                                                                                                                                                                                                                                                                                                                      |                            |                                |                                |
| Invasive mechanical ventilation                                                                                                                                                                                                                                                                                                                                         | 161 (15.7%)                | 47 (5.8%)                      | 114 (52.1%)                    |
| Non-invasive positive pressure ventilation                                                                                                                                                                                                                                                                                                                              | 27 (2.6%)                  | 10 (1.2%)                      | 17 (7.8%)                      |
| HHFNC                                                                                                                                                                                                                                                                                                                                                                   | 90 (8.8%)                  | 57 (7.1%)                      | 33 (15.1%)                     |
| Oxygen mask (>40%FIO <sub>2</sub> )                                                                                                                                                                                                                                                                                                                                     | 159 (15.5%)                | 76 (9.4%)                      | 83 (37.9%)                     |
| <i>Maximum respiratory support received, no. (%)**</i>                                                                                                                                                                                                                                                                                                                  |                            |                                |                                |
| Invasive mechanical ventilation                                                                                                                                                                                                                                                                                                                                         | 161 (15.7%)                | 47 (5.8%)                      | 114 (52.1%)                    |
| Non-invasive positive pressure                                                                                                                                                                                                                                                                                                                                          | 15 (1.5%)                  | 6 (0.7%)                       | 9 (4.1%)                       |
| HHFNC                                                                                                                                                                                                                                                                                                                                                                   | 60 (5.9%)                  | 40 (5.0%)                      | 20 (9.1%)                      |
| Oxygen mask (>40%FIO <sub>2</sub> )                                                                                                                                                                                                                                                                                                                                     | 88 (8.6%)                  | 48 (6.0%)                      | 40 (18.3%)                     |
| Nasal canula oxygen, 1-6L/min                                                                                                                                                                                                                                                                                                                                           | 441 (43.1%)                | 415 (51.6%)                    | 26 (11.9%)                     |
| No respiratory support                                                                                                                                                                                                                                                                                                                                                  | 259 (25.3%)                | 249 (30.9%)                    | 10 (4.6%)                      |
| <i>Max FIO<sub>2</sub> received, no. (%)</i>                                                                                                                                                                                                                                                                                                                            |                            |                                |                                |
| 91-100%                                                                                                                                                                                                                                                                                                                                                                 | 126 (12.3%)                | 34 (4.2%)                      | 92 (42%)                       |
| 81-90%                                                                                                                                                                                                                                                                                                                                                                  | 30 (2.9%)                  | 13 (1.6%)                      | 17 (7.8%)                      |
| 71-80%                                                                                                                                                                                                                                                                                                                                                                  | 86 (8.4%)                  | 42 (5.2%)                      | 44 (20.1%)                     |
| 61-70%                                                                                                                                                                                                                                                                                                                                                                  | 16 (1.6%)                  | 9 (1.1%)                       | 7 (3.2%)                       |
| 51-60%                                                                                                                                                                                                                                                                                                                                                                  | 26 (2.5%)                  | 14 (1.7%)                      | 12 (5.5%)                      |
| 41-50%                                                                                                                                                                                                                                                                                                                                                                  | 24 (2.3%)                  | 20 (2.5%)                      | 4 (1.8%)                       |
| 31-40%                                                                                                                                                                                                                                                                                                                                                                  | 170 (16.6%)                | 144 (17.9%)                    | 26 (11.9%)                     |
| 21-30%                                                                                                                                                                                                                                                                                                                                                                  | 287 (28%)                  | 280 (34.8%)                    | 7 (3.2%)                       |
| <i>Non-respiratory organ support received, no. (%)</i>                                                                                                                                                                                                                                                                                                                  |                            |                                |                                |
| Vasopressor                                                                                                                                                                                                                                                                                                                                                             | 141 (13.8%)                | 35 (4.3%)                      | 106 (48.4%)                    |
| Any dialysis***                                                                                                                                                                                                                                                                                                                                                         | 53 (5.2%)                  | 17 (2.1%)                      | 36 (16.4%)                     |
| CRRT only                                                                                                                                                                                                                                                                                                                                                               | 17 (1.7%)                  | 1 (0.1%)                       | 16 (7.3%)                      |
| iHD only                                                                                                                                                                                                                                                                                                                                                                | 28 (2.7%)                  | 15 (1.9%)                      | 13 (5.9%)                      |
| CPR                                                                                                                                                                                                                                                                                                                                                                     | 41 (4.0%)                  | 1 (0.1%)                       | 40 (18.3%)                     |
| Abbreviations: SE=standard error; ECMO=extra-corporeal membrane oxygenation; HHFNC=heated high flow nasal cannula; FiO <sub>2</sub> =fraction of inspired oxygen; L= liters/min; ICU=intensive care unit; PE=pulmonary embolism; DVT=deep vein thrombosis; CPR=cardiopulmonary resuscitation; CRRT=continuous renal replacement therapy; iHD=intermittent hemodialysis; |                            |                                |                                |
| * Represents any use of respiratory support. Numbers are greater than 100% as one patient may have received multiple treatments.                                                                                                                                                                                                                                        |                            |                                |                                |
| ** Represents the highest level of respiratory support a patient received during hospitalization.                                                                                                                                                                                                                                                                       |                            |                                |                                |
| *** Includes Intermittent Hemodialysis (iHD), dialysis and ultrafiltration                                                                                                                                                                                                                                                                                              |                            |                                |                                |



**Table 4. Variation in Clinical Care and Outcomes in COVID-19 Positive Patients Across Hospitals**

|                                                          | Range across Hospitals |                       |                       |        |                       |                       |       | <i>p</i> <sup>†</sup> |
|----------------------------------------------------------|------------------------|-----------------------|-----------------------|--------|-----------------------|-----------------------|-------|-----------------------|
|                                                          | Min                    | 10 <sup>th</sup> Pctl | 25 <sup>th</sup> Pctl | Median | 75 <sup>th</sup> Pctl | 90 <sup>th</sup> Pctl | Max   |                       |
| Patient characteristics                                  |                        |                       |                       |        |                       |                       |       |                       |
| Age >65, %                                               | 30.2                   | 35.3                  | 39.6                  | 51.3   | 56.8                  | 64.4                  | 65.5  | <.0001                |
| Black, %                                                 | 0.0                    | 17.7                  | 29.7                  | 46.2   | 76.4                  | 93.7                  | 94.6  | <.0001                |
| Male, %                                                  | 39.2                   | 45.6                  | 47.1                  | 53.0   | 56.8                  | 72.4                  | 73.8  | 0.07                  |
| Charlson comorbidity index, median                       | 0.0                    | 1.0                   | 1.0                   | 1.0    | 1.0                   | 2.0                   | 2.0   | 0.01                  |
| BMI, median                                              | 24.3                   | 28.4                  | 29.5                  | 31.1   | 33.3                  | 36.5                  | 36.9  | 0.09                  |
| Age, median in years                                     | 39.0                   | 46.5                  | 60.8                  | 62.4   | 66.4                  | 73.5                  | 76.0  | <.0001                |
| Admission information, %                                 |                        |                       |                       |        |                       |                       |       |                       |
| Hospital-to-hospital transfer                            | 0.0                    | 0.0                   | 0.0                   | 0.00   | 2.8                   | 10.7                  | 20.9  | <.0001                |
| Admitted directly to ICU                                 | 0.0                    | 0.0                   | 2.9                   | 6.15   | 14.8                  | 20.5                  | 43.8  | <.0001                |
| Transferred from floor to ICU                            | 0.0                    | 0.0                   | 0.0                   | 8.4    | 17.6                  | 18.8                  | 24.1  | 0.09                  |
| Admitted to a Cohorted unit                              | 0.0                    | 2.1                   | 18.6                  | 67.9   | 85.71                 | 96.3                  | 97.1  | <.0001                |
| Severe illness on presentation <sup>2</sup>              | 0.0                    | 0.00                  | 0.00                  | 0.0    | 3.7                   | 7.1                   | 7.7   | 0.09                  |
| Vasopressor use on day 1                                 | 0.0                    | 0.00                  | 0.00                  | 2.1    | 6.4                   | 10.3                  | 14.8  | 0.04                  |
| Mechanical ventilation on day 1                          | 0.0                    | 0.00                  | 0.00                  | 2.51   | 8.6                   | 11.1                  | 12.8  | 0.03                  |
| Treatment, %                                             |                        |                       |                       |        |                       |                       |       |                       |
| Treated in a Cohorted Unit                               | 0.0                    | 0.00                  | 6.3                   | 57.1   | 90.9                  | 100.0                 | 100.0 | <.0001                |
| Treated in an ICU                                        | 4.2                    | 5.4                   | 14.0                  | 19.1   | 31.0                  | 38.5                  | 62.5  | <.0001                |
| COVID-19 Specific treatment                              | 32.4                   | 57.1                  | 69.2                  | 76.4   | 81.4                  | 90.2                  | 96.3  | <.0001                |
| Concurrent antibiotic and COVID-19 specific treatment(s) | 24.3                   | 42.9                  | 59.4                  | 69.8   | 76.7                  | 84.3                  | 96.3  | <.0001                |
| Hydroxychloroquine                                       | 13.5                   | 31.4                  | 42.3                  | 59.7   | 65.5                  | 81.5                  | 82.4  | <.0001                |
| Mechanical ventilation                                   | 2.1                    | 2.7                   | 6.4                   | 10.9   | 31.0                  | 38.5                  | 40.6  | <.0001                |
| Vasopressors                                             | 2.2                    | 2.9                   | 7.0                   | 12.1   | 25.0                  | 32.1                  | 32.5  | <.0001                |
| CPR before death                                         | 0.0                    | 0.0                   | 8.3                   | 14.3   | 33.3                  | 40.0                  | 66.7  | 0.0102                |
| Outcomes, %                                              |                        |                       |                       |        |                       |                       |       |                       |
| Days of mechanical ventilation, median <sup>3</sup>      | 1.0                    | 1.0                   | 1.0                   | 5.0    | 8.0                   | 8.0                   | 9.0   | 0.01                  |
| Length of stay, median                                   | 2.0                    | 3.0                   | 3.0                   | 4.5    | 6.0                   | 8.0                   | 8.5   | <.0001                |
| ICU length of stay, median <sup>4</sup>                  | 1.0                    | 2.0                   | 3.5                   | 5.0    | 6.5                   | 7.5                   | 9.5   | 0.01                  |
| DVT                                                      | 0.0                    | 0.0                   | 0.0                   | 0.0    | 2.1                   | 3.5                   | 7.1   | 0.05                  |
| VTE                                                      | 0.0                    | 0.0                   | 0.0                   | 2.9    | 5.2                   | 6.3                   | 10.7  | 0.20                  |
| PE                                                       | 0.0                    | 0.0                   | 0.0                   | 1.8    | 3.9                   | 6.3                   | 7.1   | 0.72                  |
| Discharge status, %                                      |                        |                       |                       |        |                       |                       |       |                       |
| Death                                                    | 7.9                    | 8.3                   | 14.6                  | 21.3   | 31.0                  | 41.4                  | 45.7  | <.0001                |
| Transferred to another hospital                          | 0.0                    | 0.0                   | 0.0                   | 0.0    | 1.6                   | 2.7                   | 5.1   | 0.07                  |

|                 |      |      |      |      |      |      |      |        |
|-----------------|------|------|------|------|------|------|------|--------|
| Discharged home | 42.3 | 48.2 | 62.1 | 67.5 | 72.9 | 80.0 | 82.5 | <.0001 |
|-----------------|------|------|------|------|------|------|------|--------|

<sup>1</sup> Differences across hospitals were tested using the Kruskal–Wallis test for continuous variables and Pearson chi-square test for categorical variables.

<sup>2</sup> Defined as admission to ICU on day 1 of hospitalization and treatment with both mechanical ventilation and vasopressors.

<sup>3</sup> For patients ever on mechanical ventilation

<sup>4</sup> For patients ever in ICU

\* Variables marked with asterisk represent variation from the demographic cohort

Abbreviations: BMI=body mass index; ICU=intensive care unit; CPR=cardiopulmonary resuscitation; DVT=deep vein thrombosis; VTE=venous thromboembolism; PE=pulmonary embolism

For peer review only

1  
2  
3 **Figure Legend 1**  
4

5 *Legend. Figure depicts the proportion of the N=1024 patient cohort who are hospitalized on*  
6 *general care/ward (yellow), hospitalized in ICU (red), discharged alive (blue), transferred to a*  
7 *new hospital (light blue) and deceased over time to day 20 of hospital admission.*  
8

9  
10 **Figure Legend 2**  
11

12 *Legend. Graph depicts the proportion of the demographic cohort (n=1593) who died in hospital*  
13 *by decade of age. Black shading indicates death whereas blue shading indicates discharge*  
14 *alive.*  
15

16  
17  
18  
19  
20  
21  
22  
23  
24  
25  
26  
27  
28  
29  
30  
31  
32  
33  
34  
35  
36  
37  
38  
39  
40  
41  
42  
43  
44  
45  
46  
47  
48  
49  
50  
51  
52  
53  
54  
55  
56  
57  
58  
59  
60

For peer review only

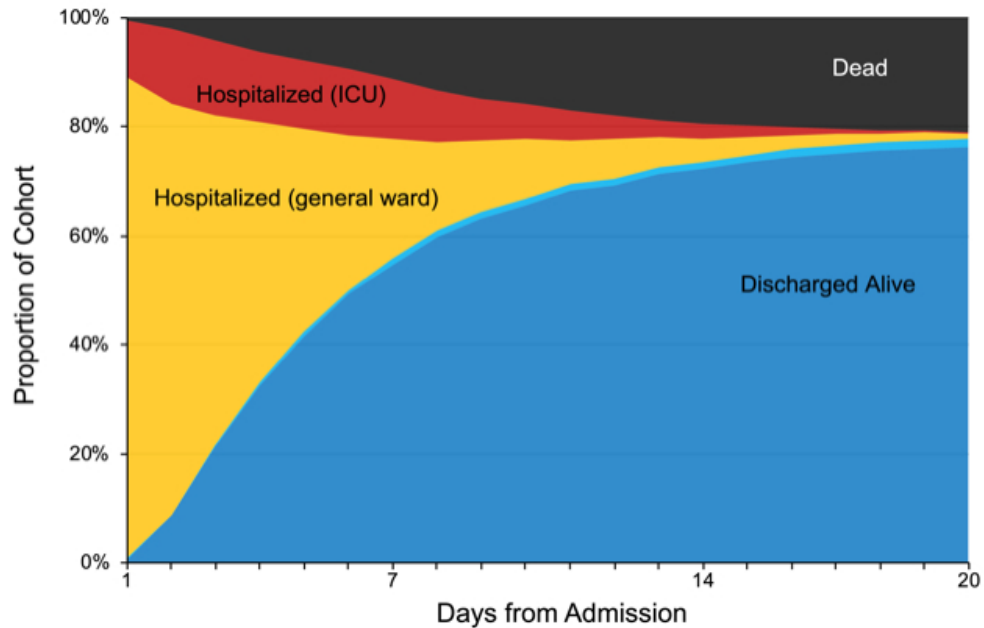

Caption : Figure 1. Proportion of COVID-19 Positive Patients in hospital, ICU, dead, and discharged over time (n=1,024). Legend. Figure depicts the proportion of the N=1024 patient cohort who are hospitalized on general care/ward (yellow), hospitalized in ICU (red), discharged alive (blue), transferred to a new hospital (light blue) and deceased over time to day 20 of hospital admission.

27x17mm (600 x 600 DPI)



Caption : Figure 2. Mortality rate for COVID-19 positive patients by decade of age (demographic data cohort, n=1,593) Legend. Graph depicts the proportion of the demographic cohort (n=1593) who died in hospital by decade of age. Black shading indicates death whereas blue shading indicates discharge alive.

116x75mm (300 x 300 DPI)

**Appendix: Availability of Laboratory Tests**

| Variable                        | N   | % missing |
|---------------------------------|-----|-----------|
| Hemoglobin (Hgb)                | 959 | 6.3%      |
| WBC *                           | 959 | 6.3%      |
| Absolute Lymphocyte Count *     | 776 | 24.2%     |
| Platelet                        | 957 | 6.5%      |
| ALT *                           | 803 | 21.6%     |
| Lactate                         | 586 | 42.8%     |
| Troponin                        | 588 | 42.6%     |
| Brain Natriuretic Peptide (BNP) | 282 | 72.5%     |
| Procalcitonin                   | 434 | 57.6%     |
| D-dimer                         | 333 | 67.5%     |
| Ferritin *                      | 419 | 59.1%     |
| CRP *                           | 460 | 55.1%     |
| Lactic Acid Dehydrogenase (LDH) | 392 | 61.7%     |
| pH* (imputed)                   | 326 | 68.2%     |
| Creatinine *                    | 956 | 6.6%      |
| Total Bilirubin                 | 777 | 24.1%     |

## STROBE (Strengthening The Reporting of OBServational Studies in Epidemiology) Checklist

A checklist of items that should be included in reports of observational studies. You must report the page number in your manuscript where you consider each of the items listed in this checklist. If you have not included this information, either revise your manuscript accordingly before submitting or note N/A.

**Note:** An Explanation and Elaboration article discusses each checklist item and gives methodological background and published examples of transparent reporting. The STROBE checklist is best used in conjunction with this article (freely available on the Web sites of PLoS Medicine at <http://www.plosmedicine.org/>, Annals of Internal Medicine at <http://www.annals.org/>, and Epidemiology at <http://www.epidem.com/>). Information on the STROBE Initiative is available at [www.strobe-statement.org](http://www.strobe-statement.org).

| Section and Item     | Item No. | Recommendation                                                                                                                                                                                                                                                                                                                                                                                                                                                                 | Reported on Page No. |
|----------------------|----------|--------------------------------------------------------------------------------------------------------------------------------------------------------------------------------------------------------------------------------------------------------------------------------------------------------------------------------------------------------------------------------------------------------------------------------------------------------------------------------|----------------------|
| Title and Abstract   | 1        | (a) Indicate the study's design with a commonly used term in the title or the abstract                                                                                                                                                                                                                                                                                                                                                                                         |                      |
|                      |          | (b) Provide in the abstract an informative and balanced summary of what was done and what was found                                                                                                                                                                                                                                                                                                                                                                            |                      |
| <b>Introduction</b>  |          |                                                                                                                                                                                                                                                                                                                                                                                                                                                                                |                      |
| Background/Rationale | 2        | Explain the scientific background and rationale for the investigation being reported                                                                                                                                                                                                                                                                                                                                                                                           |                      |
| Objectives           | 3        | State specific objectives, including any prespecified hypotheses                                                                                                                                                                                                                                                                                                                                                                                                               |                      |
| <b>Methods</b>       |          |                                                                                                                                                                                                                                                                                                                                                                                                                                                                                |                      |
| Study Design         | 4        | Present key elements of study design early in the paper                                                                                                                                                                                                                                                                                                                                                                                                                        |                      |
| Setting              | 5        | Describe the setting, locations, and relevant dates, including periods of recruitment, exposure, follow-up, and data collection                                                                                                                                                                                                                                                                                                                                                |                      |
| Participants         | 6        | (a) <i>Cohort study</i> —Give the eligibility criteria, and the sources and methods of selection of participants. Describe methods of follow-up<br><br><i>Case-control study</i> —Give the eligibility criteria, and the sources and methods of case ascertainment and control selection. Give the rationale for the choice of cases and controls<br><br><i>Cross-sectional study</i> —Give the eligibility criteria, and the sources and methods of selection of participants |                      |
|                      |          | (b) <i>Cohort study</i> —For matched studies, give matching criteria and number of exposed and unexposed<br><br><i>Case-control study</i> —For matched studies, give matching criteria and the number of controls per case                                                                                                                                                                                                                                                     |                      |
| Variables            | 7        | Clearly define all outcomes, exposures, predictors, potential confounders, and effect modifiers. Give diagnostic criteria, if applicable                                                                                                                                                                                                                                                                                                                                       |                      |

| Section and Item             | Item No. | Recommendation                                                                                                                                                                                                                                                                                            | Reported on Page No. |
|------------------------------|----------|-----------------------------------------------------------------------------------------------------------------------------------------------------------------------------------------------------------------------------------------------------------------------------------------------------------|----------------------|
| Data Sources/<br>Measurement | 8*       | For each variable of interest, give sources of data and details of methods of assessment (measurement). Describe comparability of assessment methods if there is more than one group                                                                                                                      |                      |
| Bias                         | 9        | Describe any efforts to address potential sources of bias                                                                                                                                                                                                                                                 |                      |
| Study Size                   | 10       | Explain how the study size was arrived at                                                                                                                                                                                                                                                                 |                      |
| Quantitative Variables       | 11       | Explain how quantitative variables were handled in the analyses. If applicable, describe which groupings were chosen and why                                                                                                                                                                              |                      |
| Statistical Methods          | 12       | (a) Describe all statistical methods, including those used to control for confounding                                                                                                                                                                                                                     |                      |
|                              |          | (b) Describe any methods used to examine subgroups and interactions                                                                                                                                                                                                                                       |                      |
|                              |          | (c) Explain how missing data were addressed                                                                                                                                                                                                                                                               |                      |
|                              |          | (d) <i>Cohort study</i> —If applicable, explain how loss to follow-up was addressed<br><i>Case-control study</i> —If applicable, explain how matching of cases and controls was addressed<br><i>Cross-sectional study</i> —If applicable, describe analytical methods taking account of sampling strategy |                      |
|                              |          | (e) Describe any sensitivity analyses                                                                                                                                                                                                                                                                     |                      |
| <b>Results</b>               |          |                                                                                                                                                                                                                                                                                                           |                      |
| Participants                 | 13*      | (a) Report numbers of individuals at each stage of study—eg numbers potentially eligible, examined for eligibility, confirmed eligible, included in the study, completing follow-up, and analysed                                                                                                         |                      |
|                              |          | (b) Give reasons for non-participation at each stage                                                                                                                                                                                                                                                      |                      |
|                              |          | (c) Consider use of a flow diagram                                                                                                                                                                                                                                                                        |                      |
| Descriptive Data             | 14*      | (a) Give characteristics of study participants (eg demographic, clinical, social) and information on exposures and potential confounders                                                                                                                                                                  |                      |
|                              |          | (b) Indicate number of participants with missing data for each variable of interest                                                                                                                                                                                                                       |                      |
|                              |          | (c) <i>Cohort study</i> —Summarise follow-up time (eg, average and total amount)                                                                                                                                                                                                                          |                      |
| Outcome Data                 | 15*      | <i>Cohort study</i> —Report numbers of outcome events or summary measures over time                                                                                                                                                                                                                       |                      |
|                              |          | <i>Case-control study</i> —Report numbers in each exposure category, or summary measures of exposure                                                                                                                                                                                                      |                      |
|                              |          | <i>Cross-sectional study</i> —Report numbers of outcome events or summary measures                                                                                                                                                                                                                        |                      |



| Section and Item         | Item No. | Recommendation                                                                                                                                                                                               | Reported on Page No. |
|--------------------------|----------|--------------------------------------------------------------------------------------------------------------------------------------------------------------------------------------------------------------|----------------------|
| Main Results             | 16       | (a) Give unadjusted estimates and, if applicable, confounder-adjusted estimates and their precision (eg, 95% confidence interval). Make clear which confounders were adjusted for and why they were included |                      |
|                          |          | (b) Report category boundaries when continuous variables were categorized                                                                                                                                    |                      |
|                          |          | (c) If relevant, consider translating estimates of relative risk into absolute risk for a meaningful time period                                                                                             |                      |
| Other Analyses           | 17       | Report other analyses done—eg analyses of subgroups and interactions, and sensitivity analyses                                                                                                               |                      |
| <b>Discussion</b>        |          |                                                                                                                                                                                                              |                      |
| Key Results              | 18       | Summarise key results with reference to study objectives                                                                                                                                                     |                      |
| Limitations              | 19       | Discuss limitations of the study, taking into account sources of potential bias or imprecision. Discuss both direction and magnitude of any potential bias                                                   |                      |
| Interpretation           | 20       | Give a cautious overall interpretation of results considering objectives, limitations, multiplicity of analyses, results from similar studies, and other relevant evidence                                   |                      |
| Generalisability         | 21       | Discuss the generalisability (external validity) of the study results                                                                                                                                        |                      |
| <b>Other Information</b> |          |                                                                                                                                                                                                              |                      |
| Funding                  | 22       | Give the source of funding and the role of the funders for the present study and, if applicable, for the original study on which the present article is based                                                |                      |

\*Give information separately for cases and controls in case-control studies and, if applicable, for exposed and unexposed groups in cohort and cross-sectional studies.

**Once you have completed this checklist, please save a copy and upload it as part of your submission. DO NOT include this checklist as part of the main manuscript document. It must be uploaded as a separate file.**

# BMJ Open

## Variation in COVID-19 Characteristics, Treatment, and Outcomes in Michigan: An Observational Study in 32 Hospitals

|                                 |                                                                                                                                                                                                                                                                                                                                                                                                                                                                                                                                                                                                                                                                                                                        |
|---------------------------------|------------------------------------------------------------------------------------------------------------------------------------------------------------------------------------------------------------------------------------------------------------------------------------------------------------------------------------------------------------------------------------------------------------------------------------------------------------------------------------------------------------------------------------------------------------------------------------------------------------------------------------------------------------------------------------------------------------------------|
| Journal:                        | <i>BMJ Open</i>                                                                                                                                                                                                                                                                                                                                                                                                                                                                                                                                                                                                                                                                                                        |
| Manuscript ID                   | bmjopen-2020-044921.R2                                                                                                                                                                                                                                                                                                                                                                                                                                                                                                                                                                                                                                                                                                 |
| Article Type:                   | Original research                                                                                                                                                                                                                                                                                                                                                                                                                                                                                                                                                                                                                                                                                                      |
| Date Submitted by the Author:   | 25-Jun-2021                                                                                                                                                                                                                                                                                                                                                                                                                                                                                                                                                                                                                                                                                                            |
| Complete List of Authors:       | Chopra, Vineet; University of Michigan Michigan Medicine, General Internal Medicine<br>Flanders, Scott A.; University of Michigan,<br>Vaughn, Valerie ; University of Michigan,<br>Petty, Lindsay; University of Michigan Medical School, Division of Infectious Diseases<br>Gandhi, Tejal; University of Michigan Michigan Medicine<br>McSparron, Jakob; University of Michigan Health System<br>Malani, Anurag; St Joseph Mercy Health System<br>O'Malley, Megan; University of Michigan Michigan Medicine<br>Kim, Tae; University of Michigan Michigan Medicine<br>McLaughlin, Elizabeth; University of Michigan Michigan Medicine<br>Prescott, Hallie; University of Michigan Michigan Medicine, Internal Medicine |
| <b>Primary Subject Heading</b>: | Infectious diseases                                                                                                                                                                                                                                                                                                                                                                                                                                                                                                                                                                                                                                                                                                    |
| Secondary Subject Heading:      | Epidemiology, Infectious diseases, Intensive care                                                                                                                                                                                                                                                                                                                                                                                                                                                                                                                                                                                                                                                                      |
| Keywords:                       | COVID-19, Quality in health care < HEALTH SERVICES ADMINISTRATION & MANAGEMENT, Protocols & guidelines < HEALTH SERVICES ADMINISTRATION & MANAGEMENT                                                                                                                                                                                                                                                                                                                                                                                                                                                                                                                                                                   |
|                                 |                                                                                                                                                                                                                                                                                                                                                                                                                                                                                                                                                                                                                                                                                                                        |

SCHOLARONE™  
Manuscripts



I, the Submitting Author has the right to grant and does grant on behalf of all authors of the Work (as defined in the below author licence), an exclusive licence and/or a non-exclusive licence for contributions from authors who are: i) UK Crown employees; ii) where BMJ has agreed a CC-BY licence shall apply, and/or iii) in accordance with the terms applicable for US Federal Government officers or employees acting as part of their official duties; on a worldwide, perpetual, irrevocable, royalty-free basis to BMJ Publishing Group Ltd ("BMJ") its licensees and where the relevant Journal is co-owned by BMJ to the co-owners of the Journal, to publish the Work in this journal and any other BMJ products and to exploit all rights, as set out in our [licence](#).

The Submitting Author accepts and understands that any supply made under these terms is made by BMJ to the Submitting Author unless you are acting as an employee on behalf of your employer or a postgraduate student of an affiliated institution which is paying any applicable article publishing charge ("APC") for Open Access articles. Where the Submitting Author wishes to make the Work available on an Open Access basis (and intends to pay the relevant APC), the terms of reuse of such Open Access shall be governed by a Creative Commons licence – details of these licences and which [Creative Commons](#) licence will apply to this Work are set out in our licence referred to above.

Other than as permitted in any relevant BMJ Author's Self Archiving Policies, I confirm this Work has not been accepted for publication elsewhere, is not being considered for publication elsewhere and does not duplicate material already published. I confirm all authors consent to publication of this Work and authorise the granting of this licence.

1  
2  
3 **1 Variation in COVID-19 Characteristics, Treatment, and Outcomes in Michigan: An**  
4  
5 **2**  
6 **3**  
7  
8  
9  
10 **4**  
11  
12 **5**  
13 **6**  
14 **7**  
15 **8**  
16 **9**  
17 **10**  
18 **11**  
19 **12**  
20 **13**  
21 **14**  
22 **15**  
23 **16**  
24 **17**  
25 **18**  
26 **19**  
27 **20**  
28 **21**  
29 **22**  
30 **23**  
31 **24**  
32 **25**  
33 **26**  
34 **27**  
35 **28**  
36 **29**  
37 **30**  
38 **31**  
39 **32**  
40 **33**  
41 **34**  
42 **35**  
43 **36**  
44 **37**  
45 **38**  
46 **39**  
47 **40**  
48 **41**  
49 **42**  
50 **43**  
51 **44**  
52 **45**  
53 **46**  
54 **47**  
55 **48**  
56 **49**  
57 **50**  
58 **51**  
59 **52**  
60 **53**

## Variation in COVID-19 Characteristics, Treatment, and Outcomes in Michigan: An Observational Study in 32 Hospitals

Vineet Chopra MD, MSc (a,b)

Scott A. Flanders MD (a,b)

Valerie M. Vaughn MD, MSc (a,b)

Lindsay A. Petty MD (c,b)

Tejal Gandhi, MD (c,b)

Jakob I. McSparron MD (b,d)

Anurag N. Malani MD (e,b)

Megan O'Malley, PhD (a,b)

Tae Kim, MHSA (f,g)

Elizabeth McLaughlin MS, RN (a,b)

Hallie C. Prescott MD, MSc (d,b)

From: (a) The Division of Hospital Medicine, Department of Medicine, University of

Michigan Health System, Ann Arbor, MI, USA; (b) The Michigan Hospital Medicine

Safety Collaborative, Ann Arbor, MI, USA; (c) Division of Infectious Diseases,

Department of Internal Medicine, University of Michigan Health System, Ann Arbor, MI,

USA; (d) Division of Pulmonary and Critical Care Medicine, Department of Medicine,

University of Michigan Health System, Ann Arbor, Michigan, USA; (e) Division of

Infectious Diseases, Department of Internal Medicine, St. Joseph Mercy Health System,

1  
2  
3 24 Ann Arbor, MI, USA; (f) Michigan Arthroplasty Registry Collaborative Quality Initiative  
4  
5 25 and (g) Department of Orthopaedic Surgery, University of Michigan Health System, Ann  
6  
7  
8 26 Arbor, MI, USA.  
9

10  
11  
12 28 **Abstract Word Count: 299**

13  
14  
15 29 **Word Count: 3407**

16  
17 30 **Conflicts of Interest: No relevant conflicts disclosed by coauthors.**  
18

19  
20  
21 32 **Primary Funding Source:** Blue Cross Blue Shield of Michigan (BCBSM) and Blue  
22  
23  
24 33 Care Network as part of the BCBSM Value Partnerships program.  
25

26  
27  
28 35 **Address for Correspondence:**

29  
30  
31 36 Vineet Chopra MD, MSc

32  
33 37 2800 Plymouth Road, Building 16, #432 W

34  
35 38 Ann Arbor, MI 48109

36  
37 39 [vineetc@umich.edu](mailto:vineetc@umich.edu)

38  
39  
40 40 Phone - (734) 615-8341

41  
42 41 Fax - (734) 936-8944  
43

44  
45 42 **Keywords:**

46  
47 43 Covid-19; Quality in Health care; Protocols and Guidelines  
48

49  
50 44

51  
52 45

53  
54 46  
55  
56  
57  
58  
59  
60

1  
2  
3 474  
5 486  
7  
8 49 **Additional Contributions & Acknowledgements:**9  
10 50 The authors thank Qisu (Sue) Zhang, MPH, Tawny Czilok, RN, MHI, Liz Vasher, RN,11  
12 51 Jessica Southwell, RN, MSN, Danny Nielsen, MS, and Jennifer Horowitz, MA for help13  
14  
15 52 with data analytics and project management.16  
17 53  
18  
19 54 We also thank all the BCBSM Collaborative Quality Initiatives (CQI's) that partnered20  
21  
22 55 together on data collection and offered project management/analytics support. Lastly,23  
24 56 we are grateful to all of the hospitals who volunteered to be part of MiCOVID-1925  
26 57 including: Beaumont-Dearborn, Beaumont-Grosse Pointe, Beaumont- Farmington Hills,27  
28 58 Beaumont- Royal Oak, Beaumont- Taylor, Beaumont- Trenton, Beaumont- Troy,29  
30 59 Beaumont- Wayne, Bronson Battle Creek, Bronson Methodist, Detroit Medical Center-31  
32  
33 60 Detroit Receiving, Detroit Medical Center-Harper Hutzell, Detroit Medical Center-Detroit-34  
35 61 Huron Valley Sinai, Henry Ford, Henry Ford Allegiance, Henry Ford Macomb, Henry36  
37 62 Ford West Bloomfield, Henry Ford West Wyandotte, Holland Hospital, Hurley Medical38  
39 63 Center, Lakeland Hospital, McLaren Flint, McLaren Greater Lansing, McLaren Port40  
41 64 Huron, Mercy Health Muskegon, Mercy Health St. Mary's, Metro Health, Michigan42  
43 65 Medicine, MidMichigan Alpena, MidMichigan Gratiot, MidMichigan Midland, Munson44  
45 66 Medical Center, Oaklawn Hospital, Sinai Grace, Sparrow, St. Joseph Mercy Ann Arbor,46  
47 67 St. Joseph Mercy Chelsea, St. Joseph Mercy Livingston, St. Joseph Mercy Oakland, St.48  
49  
50 68 Mary Mercy Livonia.51  
52  
53  
54 69

1  
2  
3 **70 Contributor Statements:**  
4

5 71 Vineet Chopra MD, MSc – manuscript planning; interpretation of the data; manuscript  
6  
7  
8 72 drafting/revisions; final approval to be published  
9

10 73 Scott A. Flanders MD – manuscript planning; manuscript drafting/revisions; final  
11  
12 74 approval to be published  
13

14 75 Valerie M. Vaughn MD, MSc – manuscript planning; manuscript drafting/revisions; final  
15  
16  
17 76 approval to be published  
18

19 77 Lindsay A. Petty MD – manuscript planning; manuscript drafting/revisions; final approval  
20  
21  
22 78 to be published  
23

24 79 Tejal Gandhi, MD – manuscript planning; manuscript drafting/revisions; final approval to  
25  
26 80 be published  
27

28 81 Jakob I. McSparron MD – manuscript planning; manuscript drafting/revisions; final  
29  
30  
31 82 approval to be published  
32

33 83 Anurag N. Malani MD – manuscript planning; manuscript drafting/revisions; final  
34  
35  
36 84 approval to be published  
37

38 85 Megan O'Malley, PhD – data analysis; interpretation of the data; final approval to be  
39  
40 86 published  
41

42 87 Tae Kim, MHSA (f,g) – manuscript planning; final approval to be published  
43

44 88 Elizabeth McLaughlin MS, RN (a,b) – manuscript planning; manuscript  
45  
46  
47 89 drafting/revisions; final approval to be published  
48

49 90 Hallie C. Prescott MD, MSc – manuscript planning; interpretation of the data;  
50  
51  
52 91 manuscript drafting/revisions; final approval to be published  
53

54 92  
55  
56  
57  
58  
59  
60

1  
2  
3 **93 ABSTRACT**

4 94  
5 **95 OBJECTIVES**

6  
7  
8 96 To describe patient characteristics, symptoms, patterns of care and outcomes for  
9  
10 97 patients hospitalized with COVID-19 in Michigan.

11 98  
12  
13  
14 **99 DESIGN**

15  
16  
17 100 Multi-center retrospective cohort study.

18 101  
19  
20  
21 **102 SETTING**

22  
23  
24 103 32 acute care hospitals in the state of Michigan.

25 104  
26  
27  
28 **105 PARTICIPANTS**

29  
30  
31 106 Patients discharged (March 16 to May 11, 2020) with suspected or confirmed  
32  
33 107 COVID-19 were identified. Trained abstractors collected demographic information on all  
34  
35 108 patients, and detailed clinical data on a subset of COVID-19 positive patients.

36  
37  
38  
39  
40 **110 PRIMARY OUTCOME MEASUREMENTS**

41  
42 111 Patient characteristics, treatment, and outcomes including cardiopulmonary  
43  
44 112 resuscitation, mortality, and venous thromboembolism within and across hospitals.

45  
46  
47  
48  
49 **114 RESULTS**

50  
51 115 Demographic-only data from 1,593 COVID-19 positive and 1,259 persons under  
52  
53 116 investigation discharges were collected. Among 1,024 cases with detailed data, the



1  
2  
3 117 median age was 63 years, median BMI was 30.6, and 51.4% were black. Cough, fever,  
4  
5 118 and shortness of breath were the top symptoms. 37.2% reported a known COVID-19  
6  
7 119 contact, 7.0% were healthcare workers, and 16.1% presented from congregated living  
8  
9 120 facilities.

10  
11  
12 121 During hospitalization, 232 (22.7%) patients were treated in an ICU, 558 (54.9%)  
13  
14 122 in a “cohorted” unit, 161 (15.7%) received mechanical ventilation, and 90 (8.8%)  
15  
16 123 received high-flow nasal cannula. ICU patients more often received hydroxychloroquine  
17  
18 124 (66% vs. 46%), corticosteroids (34% vs 18%), and antibiotic therapy (92% vs 71%) than  
19  
20 125 general ward patients ( $p < 0.05$  for all). Overall, 219 (21.4%) patients died, with in-  
21  
22 126 hospital mortality ranging from 7.9% to 45.7% across hospitals. 73% received at least  
23  
24 127 one COVID-19-specific treatment, ranging from 32% to 96% across sites.

25  
26 128 Across 14 hospitals, the proportion of patients admitted directly to an ICU ranged from  
27  
28 129 0% to 43.8%; mechanical ventilation on admission from 0% to 12.8%; mortality from  
29  
30 130 7.9% to 45.7%. Use of at least one COVID-19 specific therapy varied from 32% to  
31  
32 131 96.3% across sites.

## 33 34 35 36 37 38 39 133 **CONCLUSIONS**

40  
41  
42 134 During the early days of the Michigan outbreak of COVID-19, patient  
43  
44 135 characteristics, treatment, and outcomes varied widely within and across hospitals.

1  
2  
3 136 **Article Summary**  
4

5 137 **Strengths and Limitations of this Study**  
6

- 7
- 8 138 • Using rigorous data collection including a well-defined sampling strategy and  
9  
10 139 trained data abstractors, our paper is the largest multi-hospital study to examine  
11  
12 140 clinical aspects related to COVID-19 in Michigan.  
13
- 14 141 • This is the first study to examine variations in clinical care processes, treatment  
15  
16 142 approaches and outcomes across hospitals.  
17
- 18 143 • The high rate of use of non-evidence-based therapies for treating COVID-19 has  
19  
20 144 significant safety, economic and policy implications for the most critically ill  
21  
22 145 subsets in the hospital.  
23
- 24 146 • Given the observational nature of the study and potential missing documentation  
25  
26 147 on symptoms, comorbidities, or treatments in the medical record, rationales for  
27  
28 148 treatment or management decisions cannot be determined.  
29  
30 149 • Our sampling frame may be biased as patients who remain hospitalized may not  
31  
32 150 be included in our cohort.  
33  
34  
35  
36  
37  
38 151
- 39  
40  
41  
42  
43  
44  
45  
46  
47  
48  
49  
50  
51  
52  
53  
54  
55  
56  
57  
58  
59  
60

## 152 INTRODUCTION

153 Since detection in Wuhan, China,<sup>1 2</sup> over 4.5 million cases of COVID-19, caused  
154 by severe acute respiratory syndrome coronavirus-2 (SARS-CoV-2) have been  
155 reported.<sup>3</sup> The United States (US) leads the world in the total number of cases, with  
156 over 1.5 million cases and 92,000 deaths reported as of May 20, 2020.<sup>4</sup> Within the US,  
157 Michigan remains one of the hardest hit states, with over 52,000 cases and 5,000  
158 deaths as of May 20, 2020.<sup>5</sup>

159 In the early days of the pandemic, data regarding patient characteristics,  
160 symptoms and signs and presentation and care strategies including aspects such as  
161 oxygenation, laboratory testing, and therapeutics were unclear. As well, short and long-  
162 term outcomes of patients exposed to these varying approaches was unknown. Some  
163 studies reported substantial variation in patient characteristics and treatment modalities  
164 across hospitals. But the extent of such variation and impact on outcomes remained  
165 unknown.

166 Michigan has a long history of collaborative quality improvement work that spans  
167 several disciplines including cardiovascular medicine, emergency medicine and hospital  
168 medicine, among others.<sup>6</sup> These consortia collect detailed clinical variables from  
169 hospitals to populate a central registry, allowing benchmarking and comparisons of care  
170 and outcomes. As the COVID-19 pandemic unfolded in Southeast Michigan, several  
171 consortia came together to focus data collection on patients hospitalized with COVID-  
172 19.

1  
2  
3 173 Using a well-established data collection strategy, we examined variations in  
4  
5 174 clinical care processes, treatment approaches, and clinical outcomes across Michigan  
6  
7  
8 175 hospitals.  
9

10 176

11  
12 177 **METHODS**  
13

14 178 A retrospective cohort design was used. Data were collected from medical  
15  
16  
17 179 records of patients discharged between March 16, 2020 and May 11, 2020 from one of  
18  
19 180 32 Michigan hospitals who participate in collaborative quality initiatives sponsored by  
20  
21 181 Blue Cross Blue Shield of Michigan and Blue Care Network. Trained abstractors at each  
22  
23 182 hospital identified adult patients  $\geq 18$  years of age that underwent testing for COVID-19  
24  
25 183 via reverse-transcriptase polymerase chain reaction, including both positive cases and  
26  
27 184 persons under investigation (PUI) who eventually had a negative test. Abstractors were  
28  
29 185 asked to abstract as many eligible cases as possible for their hospital. Demographic  
30  
31 186 data (age, gender, race, ethnicity, payor) and in-hospital mortality were collected for all  
32  
33 187 confirmed and PUI cases. A sample of COVID-19 positive cases from each hospital was  
34  
35 188 selected for detailed abstraction. Positive cases were sorted by day of admission (e.g.,  
36  
37 189 Mon-Sun) and, for each day, a pseudo-random number (minute of hospital discharge)  
38  
39 190 was used to select patients for detailed abstraction. Patients who were pregnant,  
40  
41 191 transitioned to hospice within 3 hours of hospital admission, or discharged against  
42  
43 192 medical advice were excluded. All data were entered into a registry (Mi-COVID19) using  
44  
45 193 a structured data collection template. Of the 92 noncritical access, nonfederal hospitals  
46  
47 194 in Michigan, data from 32 hospitals (34.8%) was included in the sample. Included  
48  
49  
50  
51  
52  
53  
54  
55  
56  
57  
58  
59  
60

1  
2  
3 195 hospitals are diverse in terms of size, teaching status, and ownership structure  
4  
5 196 (Appendix 1).  
6  
7  
8 197

9  
10 198 Patient characteristics including comorbidities, home medications, presenting  
11  
12 199 symptoms and risk factors for COVID-19 (e.g., exposure to sick contacts, healthcare  
13  
14 200 worker) were collected. Clinical data during hospitalization including location of care  
15  
16 201 (ward vs. intensive care unit [ICU], a “cohorted” COVID-19 only unit), vital signs, body  
17  
18 202 mass index (BMI), laboratory and radiology findings and therapeutics were abstracted.  
19  
20 203 Organ supports such as mechanical ventilation and other respiratory support,  
21  
22 204 vasopressor use, renal replacement therapy (continuous renal replacement therapy  
23  
24 205 [CRRT] and intermittent hemodialysis [iHD]) were also collected.  
25  
26  
27

28 206 The primary outcomes of interest included hospital mortality, receipt of cardiopulmonary  
29  
30 207 resuscitation (CPR), and occurrence of deep vein thrombosis (DVT) or pulmonary  
31  
32 208 embolism (PE) (based on positive imaging findings or initiation of empiric therapy for  
33  
34 209 presumed thrombosis). In addition, we performed pre-specified exploratory analyses in  
35  
36 210 hospitals with at least 25 detailed abstractions (n=14 hospitals) to examine variation in  
37  
38 211 patient characteristics, management and outcomes. Specifically, we assessed variation  
39  
40 212 in use of COVID-19 specific treatments (defined as hydroxychloroquine, combination  
41  
42 213 hydroxychloroquine plus azithromycin, Vitamin C [oral or intravenous], IL-6 inhibitors or  
43  
44 214 remdesivir), antibiotic therapy, use of organ support (e.g., use of vasopressors,  
45  
46 215 mechanical ventilation and CPR), occurrence of venous thrombosis and in-hospital  
47  
48 216 mortality.  
49  
50  
51  
52  
53  
54  
55  
56  
57  
58  
59  
60

1  
2  
3 217 Descriptive statistics (e.g., mean, median, proportion) with measures of  
4  
5 218 dispersion (e.g., standard error, inter-quartile range [IQR]) were used to summarize  
6  
7 219 data. Data that were not documented in medical records (e.g., values of certain  
8  
9 220 laboratory tests) were reported as missing. Pairwise comparisons were made using t-  
10  
11 221 tests for continuous data and chi-square tests for categorical data, respectively.  
12  
13 222 Differences across hospitals were tested using the Kruskal–Wallis test for continuous  
14  
15 223 variables and Pearson chi-square test for categorical variables. All statistical tests were  
16  
17 224 two-sided with  $p < 0.05$  considered statistically significant. The study was reviewed by the  
18  
19 225 Institutional Review Board of the University of Michigan and deemed “not regulated”. It  
20  
21 226 was not appropriate or possible to involve patients or the public in the design, or  
22  
23 227 conduct, or reporting, or dissemination plans of our research.  
24  
25  
26  
27  
28  
29  
30

## 31 229 Patient and Public Involvement

32  
33 230

34  
35 231 No patient involved.  
36  
37  
38 232

## 39 233 Data Availability

40  
41 234

42  
43 235 All data relevant to the study are included in the article or uploaded as supplementary  
44  
45 236 information.  
46  
47  
48  
49 237

## 50 51 238 **RESULTS**

### 52 53 239 **DEMOGRAPHIC DATA**

1  
2  
3 240 Demographic-only data from 1,593 COVID-19 positive and 1,259 PUI discharges  
4  
5 241 from 32 Michigan hospitals were collected. PUIs had a median age of 64.4 years,  
6  
7 242 52.6% were male and 32.0% Black. COVID-19 positive patients had similar age and  
8  
9 243 gender as PUIs (63.9 years, and 52.1% male, respectively), but were more commonly  
10  
11 244 Black (57.1% vs. 32.0%,  $p<0.01$ ). In the demographic-only cohort, 398 (25.0%) COVID-  
12  
13 245 19 positive patients died during hospitalization.  
14

15  
16  
17 246 Detailed data were abstracted on 1,024 (64.3%) randomly-selected COVID-19  
18  
19 247 positive patients. The most prevalent comorbidities were hypertension (65.4%),  
20  
21 248 diabetes (36.8%), cardiovascular disease (26.0%) and chronic kidney disease (23.3%);  
22  
23 249 14.9% of patients had no comorbidities. Though 12.8% of patients had a diagnosis of  
24  
25 250 asthma and 11.2% had a diagnosis of chronic obstructive pulmonary disease, pre-  
26  
27 251 hospital use of inhaled steroids, long-acting beta-agonists and long-acting  
28  
29 252 antimuscarinic agents was low at 4.2%, 2.9%, and 0.5%, respectively. Current smoking  
30  
31 253 or vaping was uncommon, but 27.3% were former smokers, and 35.8% reported former  
32  
33 254 vaping. 115 (11.3%) patients were on immunosuppressive medications prior to  
34  
35 255 hospitalization, including 62 (6.1%) who were on oral steroids. Essential workers  
36  
37 256 comprised 12.8% of the cohort, including healthcare workers (7.0%) and service  
38  
39 257 workers (5.8%, e.g., postal, food service, transportation). Prior to admission, 16.1% of  
40  
41 258 patients resided in congregated living facilities, including nursing homes and homeless  
42  
43 259 shelters (**Table 1**).  
44  
45  
46  
47  
48

49 260

## 50 51 261 **CLINICAL PRESENTATION AND INITIAL EVALUATION**

52  
53  
54  
55  
56  
57  
58  
59  
60

1  
2  
3 262 In the detailed abstraction cohort (n=1,024), median duration of symptoms prior  
4  
5 263 to hospitalization was 6 days (IQR 3-9). The most common presenting symptoms were  
6  
7 264 cough (73.3%), fever (71.8%), and shortness of breath (72.2%); only 8% of patients did  
8  
9  
10 265 not report one of these 3 complaints (**Table 1**). Gastrointestinal symptoms including  
11  
12 266 nausea, vomiting and diarrhea occurred in 39.4% of patients. Over a third of patients  
13  
14 267 (37.2%) reported sick contacts at the time of admission, and 23.8% reported contact  
15  
16  
17 268 with a patient known to have COVID-19. The location of diagnostic testing for COVID-19  
18  
19 269 varied: 67.5% of patients were tested in hospital laboratories, 23.2% in commercial  
20  
21 270 laboratories, and 8.0% in the state laboratory. Patients were most commonly admitted  
22  
23 271 to a general medical/surgical ward (59.5%), but 15.7% were admitted to intermediate  
24  
25 272 care, 13.5% were admitted directly to ICU, and 11.3% were admitted to an observation  
26  
27  
28 273 unit (**Figure 1**). A total of 419 (40.9%) of patients were admitted to a “cohorted”  
29  
30 274 (COVID-19 only) unit. At admission, 6.3% of patients had do not resuscitate/do not  
31  
32 275 intubate orders, which increased to 13.8% by discharge.

33  
34  
35 276 Common laboratory testing on admission included white blood cell count  
36  
37 277 (93.7%), absolute lymphocyte count (75.8%), troponin (57.4%), lactate (57.2%), CRP  
38  
39 278 (44.9%) and procalcitonin (42.4%) (missingness by laboratory test are reported in the e-  
40  
41 279 Appendix 2). Among those with available laboratory data, patients who received ICU  
42  
43 280 treatment had higher levels of inflammatory markers at admission including d-dimer  
44  
45 281 (2.88mg/L vs. 1.65mg/L), ferritin (872ng/mL vs. 559ng/mL), CRP (24.3mg/dL vs.  
46  
47 282 13.8mg/dL) and LDH (476U/L vs. 346U/L) (**Table 2**). Chest imaging (X-ray or CT) was  
48  
49 283 performed in 528 (51.6%) patients within 1 day of admission and was more common in  
50  
51 284 ICU than general care patients (59.9% vs 49.1%, p=0.004). ICU patients were more  
52  
53  
54  
55  
56  
57  
58  
59  
60



1  
2  
3 285 likely to have radiographic abnormalities on presentation. Viral respiratory panels, blood  
4  
5 286 cultures and sputum cultures were collected in 722 (51.0%) patients, but were positive  
6  
7 287 in only 48 (4.7%) patients; 9.5% of ICU patients vs. 3.3% of general care patients had a  
8  
9 288 viral or bacterial pathogen identified ( $p < 0.001$ ).

289

## 290 **CRITICAL CARE TREATMENT**

291 Overall, 232 patients (22.7%) were treated in an ICU, including 138 (13.5%) who  
292 were admitted directly to an ICU, and 94 (9.2%) who were transferred to ICU a median  
293 of 2 days following admission. Median length of ICU stay was 6 days (IQR 3-9), which  
294 was similar in survivors vs. non-survivors (5 vs 6 days,  $p = 0.790$ ). Among 1,024 patients  
295 with detailed abstraction, the maximum respiratory support received was invasive  
296 mechanical ventilation in 161 patients (15.7%), non-invasive positive pressure  
297 ventilation in 15 (1.5%), heated high-flow nasal cannula in 60 (5.9%), oxygen mask  
298 ( $>40\%$   $FiO_2$  or  $>6L/min$ ) in 88 (8.6%), and nasal cannula oxygen (1-6L/min) in 441  
299 (43.1%) (**Table 3**). 259 (25.3%) patients received no respiratory support or oxygen  
300 therapy during hospitalization. Among 78 patients initiated on HHFNC, 13 (16.7%)  
301 progressed to invasive mechanical ventilation. Among 25 patients initiated on NIPPV,  
302 10 (40.0%) progressed to invasive mechanical ventilation. An additional 12 patients and  
303 2 patients, respectively, used HHFNC and NIPPV after extubation.

304 Upon initiation of mechanical ventilation, patients were predominantly treated  
305 with a volume control mode (75%), with high  $FIO_2$  ( $\geq 80\%$  in 49.1% of ventilated  
306 patients), and modest tidal volumes (median tidal volume 7.0 ml/kg predicted body  
307 weight, [IQR 6.2-8.0]). The median duration of mechanical ventilation was 6 days (IQR

1  
2  
3 308 3-8 days). Prone positioning was documented in 18 patients, pulmonary vasodilators in  
4  
5 309 2 patients, and extra corporeal membrane oxygenation in 2 patients. CPR was  
6  
7 310 administered to 41 patients (4.0%), with only one patient surviving to hospital discharge.

8  
9  
10 311 Vasopressors were used in 141 patients (13.8%), dialysis in 53 (5.2%), and  
11  
12 312 corticosteroids in 222 (21.7%) patients. 771 (75.3%) patients received broad-spectrum  
13  
14 313 antibiotics, with use being more common in the ICU than general wards (91.8% vs  
15  
16 314 70.5%,  $p<0.001$ ).

17  
18  
19 315

## 20 21 316 **COVID-19 SPECIFIC THERAPIES**

22  
23  
24 317 A total of 747 (72.9%) patients were treated with therapies targeting COVID-19,  
25  
26 318 or the body's response to COVID-19, most commonly hydroxychloroquine (51%),  
27  
28 319 hydroxychloroquine plus azithromycin (36%), and Vitamin C (10%). Treatment with IL-6  
29  
30 320 inhibitors and remdesivir was infrequent (27 and 17 patients, respectively). Use of  
31  
32 321 COVID-19 treatments was more common in ICU than general care patients (88% vs.  
33  
34 322 69%,  $p<0.001$ ). No patients in our sample received convalescent plasma. The  
35  
36 323 proportion of patients treated with COVID-19 specific therapies decreased over time  
37  
38 324 from 78.1% of patients admitted during March 8 to March 31 to 65.0% of patients  
39  
40 325 admitted during April 1 to May 11 ( $p<0.001$ ). Only 21 (2.0%) patients were enrolled into  
41  
42 326 a clinical trial (**Table 2**).

43  
44  
45 327

## 46 47 328 **CLINICAL OUTCOMES**

48  
49  
50 329 The in-hospital mortality rate for the full cohort of COVID-19 positive patients  
51  
52 330 (demographic plus detailed abstractions) was 25.0%. Mortality varied by decade of age,  
53  
54  
55  
56  
57  
58  
59  
60

1  
2  
3 331 ranging from 4.5% among patients aged 30-39 to 37.5% in patients aged 70-79 years  
4  
5 332 **(Figure 2)**. Among 219 decedents with detailed abstraction, 134 (61.5%) died following  
6  
7 333 ICU treatment and 114 (52.1%) died after receiving mechanical ventilation. 40 of 219  
8  
9 334 decedents (18.3%) received cardiopulmonary resuscitation, and 91 (41.6%) were  
10  
11 335 transitioned to comfort care prior to death. The most common causes of death were  
12  
13 336 refractory hypoxemia (29.4%), cardiac arrhythmia (15.9%) and refractory shock  
14  
15 337 (10.7%). Venous thromboembolism occurred in 32 (3.1%) of patients, of which 9  
16  
17 338 experienced proximal lower-extremity DVT, 21 experienced PE, and 2 experienced both  
18  
19 339 DVT and PE.  
20  
21  
22  
23

24 340 Among the 805 patients that survived to hospital discharge, 86% were  
25  
26 341 discharged home and 8% were discharged to a skilled nursing facility or rehabilitation  
27  
28 342 center. Only 1 patient (0.1%) was discharged to the Detroit field hospital **(Table 3)**.  
29  
30  
31  
32

### 33 344 **VARIATION ACROSS HOSPITALS**

34  
35 345 Among 14 hospitals with at least 25 detailed abstractions, substantial variation in  
36  
37 346 demographics, illness severity, care processes, treatments, and outcomes of COVID-19  
38  
39 347 positive patients were observed **(Table 4)**. The proportion of patients over 65 years of  
40  
41 348 age ranged from 30.2% to 65.5%, while the proportion of Black patients ranged from 0%  
42  
43 349 to 94.6%. Similarly, the proportion of patients admitted directly to an ICU ranged from  
44  
45 350 0% to 43.8%, while the proportion of patients who were transferred to an ICU after  
46  
47 351 admission ranged from 0% to 24.1%. Treatment in “cohorted” units ranged from 0% to  
48  
49 352 100%. Mechanical ventilation on admission ranged from 0% to 12.8% while use of  
50  
51 353 vasopressors on admission ranged from 0% to 14.8% across hospitals. Critical illness  
52  
53  
54  
55  
56  
57  
58  
59  
60

1  
2  
3 354 on presentation (defined as admission to an ICU with receipt of vasopressors or  
4  
5 355 mechanical ventilation on admission) varied from 0% to 7.7%.

6  
7 356 72.9% of patients received at least one COVID-19 specific therapy (e.g.,  
8  
9 357 hydroxychloroquine, hydroxychloroquine plus azithromycin, interleukin-6 inhibitor,  
10  
11 358 antiviral therapy), but use varied from 32% to 96.3% across sites. Similarly, 65% of  
12  
13 359 patients received concurrent antibiotics and COVID-19 specific treatment during  
14  
15 360 hospitalization, with frequency varying from 50% to 100% in ICU patients vs. 17% to  
16  
17 361 95% in general care patients.

18  
19 362 Mortality across hospitals varied from 7.9% to 45.7% of patients, and rates of  
20  
21 363 CPR before death ranged from 0% to 66.7%. Finally, rates of VTE also varied, occurring  
22  
23 364 in 0 to 11% of patients across hospitals.

24  
25 365

## 26 366 **DISCUSSION**

27  
28 367 While reports of COVID-19 patients from New York, Washington, and California  
29  
30 368 exist,<sup>7-9</sup> this is the first multi-center study to examine epidemiology, treatment and  
31  
32 369 outcomes of COVID-19 hospitalizations in Michigan. Also, in contrast to prior multi-  
33  
34 370 hospital US cohorts, the Mi-COVID19 registry includes a large sample of patients  
35  
36 371 treated at a diverse set of 32 academic and community hospitals.

37  
38 372 The demographics of our cohort differ from other cohorts. First, patients with  
39  
40 373 confirmed COVID-19 in Michigan are disproportionately Black (over half of our cohort).  
41  
42 374 This is in contrast to 32% of PUIs—indicating that the predominance of black patients  
43  
44 375 with COVID-19 is not a reflection of local demographics, but rather disproportionate  
45  
46 376 impact of COVID-19 on black patients. Second, in contrast to prior studies,<sup>1 7 10</sup> our

1  
2  
3 377 cohort was nearly 50:50 male:female, rather than male dominant. The reasons for this  
4  
5 378 difference are unclear.

6  
7  
8 379 Consistent with prior reports, the main presenting symptoms were cough,  
9  
10 380 dyspnea and fever. Similar to other studies,<sup>11</sup> a substantial proportion of patients had  
11  
12 381 multiple comorbidities; but notably, 15% of our cohort had no known medical  
13  
14 382 problems.<sup>12</sup> We found that a substantial proportion of patients reported contact with a  
15  
16 383 known COVID-19 positive patient prior to developing symptoms. These findings mirror  
17  
18 384 those of a study from Shenzhen, China, where contacts of those with disease  
19  
20 385 experienced a significantly higher rate of infection than the general public.<sup>13</sup> Additionally,  
21  
22 386 patients underwent COVID-19 testing through a number of venues including hospital,  
23  
24 387 commercial and state-run laboratories, illustrating the myriad ways in which diagnosis  
25  
26 388 was obtained early in the outbreak when testing was limited.<sup>14</sup> Although only 14% of the  
27  
28 389 sample was admitted directly to an ICU, an additional 9% were transferred to an ICU  
29  
30  
31 390 later in hospitalization. Hospital mortality in cases with detailed abstractions was 21%,  
32  
33 391 but increased with age, consistent with prior studies.<sup>15</sup>

34  
35  
36  
37 392 A key finding of our study is that a majority of patients hospitalized for COVID-19  
38  
39 393 were treated with therapies intended to mitigate SARS-CoV-2 viral replication or the  
40  
41 394 body's immune response. More than half of patients were treated with  
42  
43 395 hydroxychloroquine, and an additional 6% were treated with antivirals or immune  
44  
45 396 modulating agents. Experts have increasingly questioned the use of unproven COVID-  
46  
47 397 19 therapies outside of a clinical trial,<sup>16</sup> and have argued that supportive care and trial  
48  
49 398 enrollment are the best options until data regarding efficacy of therapies accrues.<sup>17 18</sup>  
50  
51  
52 399 Accumulating observational and trial data now suggest no benefit from  
53  
54  
55  
56  
57  
58  
59  
60

1  
2  
3 400 hydroxychloroquine,<sup>19-21</sup> and concerns regarding harm from empiric use remain.<sup>22</sup>  
4  
5 401 Unfortunately, only 2% of our sample was enrolled in clinical trials. The high rate of  
6  
7 402 experimental COVID-19 therapies outside empiric studies represents a lost opportunity  
8  
9 403 for learning. It is also emblematic of the strong desire—particularly early in the  
10  
11 404 pandemic—to use therapies with a theoretical potential to target the virus even though  
12  
13 405 improved survival from critical illness is largely attributed to improvements in supportive  
14  
15 406 care.<sup>23</sup> Notably, we still do not have targeted therapies for sepsis or acute respiratory  
16  
17 407 distress syndrome, which are the major mechanisms by which patients die from COVID-  
18  
19 408 19 infection.

20  
21  
22  
23 409 Another strength of our study is the variation in clinical presentation and  
24  
25 410 outcomes we observed across a heterogeneous sample of hospitals. Use of COVID-19  
26  
27 411 specific treatments, corticosteroids, and antibiotics varied markedly across hospitals.  
28  
29 412 While we are unable to ascertain reasons for such variation, we anecdotally observed  
30  
31 413 that practice evolved across hospitals over time. For example, at some Michigan  
32  
33 414 hospitals, routine use of hydroxychloroquine was common in the first few weeks of the  
34  
35 415 pandemic but curbed as trial data became available. In contrast, use of  
36  
37 416 hydroxychloroquine continues to be encouraged at other hospitals even today.<sup>24</sup> While it  
38  
39 417 is unclear if these practice changes influenced outcomes, future studies exploring the  
40  
41 418 rationale and impact of these changes on patients will be valuable.

42  
43  
44  
45 419 Our finding provides corroboratory information regarding the first COVID wave  
46  
47 420 within Michigan. For example, in a single center retrospective study, Imam and  
48  
49 421 colleagues found that advanced age and increasing number of comorbidities were  
50  
51 422 independent predictors of in-hospital mortality in hospitalized Michigan patients, just as  
52  
53  
54  
55  
56  
57  
58  
59  
60

1  
2  
3 423 we did in our cohort.<sup>25</sup> Similarly, in two national population-level studies led by the  
4  
5 424 Centers for Disease Prevention and Control, individuals over 65 years of age and those  
6  
7 425 with  $\geq 3$  comorbidities experienced greater risk of hospitalization and adverse outcomes,  
8  
9  
10 426 again consistent with our findings.<sup>26 27</sup> Our findings are also similar to others regarding  
11  
12 427 disparities in COVID care and outcomes, especially among minority populations.<sup>28</sup>  
13  
14 428 Despite these findings, our study also differ from other national studies in important  
15  
16 429 ways. For example, we observed a low rate of readmissions in our cohort. In contrast,  
17  
18 430 Donnelly et al. using Veterans Health Affairs (VHA) data reported a readmission rate of  
19  
20 431 19.9% at 60-days.<sup>29</sup> While the reasons for this discrepancy are unclear, it is possible  
21  
22 432 that practice pattern differences including variation in threshold for readmission and  
23  
24 433 differences in patient characteristics may account for these discrepancies. As we begin  
25  
26 434 to understand and manage the chronic sequelae of acute COVID,<sup>30</sup> studies  
27  
28 435 understanding reasons for these pattern differences would be important. Another  
29  
30 436 important difference lies in the use of therapeutics targeting COVID-19. For example,  
31  
32 437 reports from New York City and Seattle show greater rates of use of remdesivir, and IL-  
33  
34 438 6 inhibitors.<sup>31 32</sup> Whether these differences were due to practice variation (which  
35  
36 439 occurred widely in the early US waves of COVID-19), vs. lack of access to therapeutics  
37  
38 440 which was also reported is unclear.

39  
40 441 Our study has limitations. First, given the observational nature of the study,  
41  
42 442 rationales for treatment or management decisions cannot be determined. Second,  
43  
44 443 because our sampling frame included patients that were discharged or deceased, our  
45  
46 444 findings may be biased as patients who remain hospitalized may not be included in our  
47  
48 445 cohort (potentially explaining lower duration of mechanical ventilation and hospital stay).  
49  
50  
51  
52  
53  
54  
55  
56  
57  
58  
59  
60



1  
2  
3 446 However, COVID-19 hospitalizations in Southeastern Michigan have been declining  
4  
5 447 since mid-April—limiting the degree of bias from exclusion of patients still in the  
6  
7 448 hospital. Third, while variation in care was observed, the implications of such variability  
8  
9 449 on clinical outcomes is unknown. Nevertheless, given that therapeutic modalities are  
10  
11 450 scarce and not without risks, reducing variation may improve patient safety and  
12  
13 451 resource use. Fourth, our study depends on available documentation, so symptoms,  
14  
15 452 comorbidities, or treatments not documented in the medical record may be omitted. For  
16  
17 453 example, it is possible that the low use of prone positioning observed in our cohort may  
18  
19 454 be due to incomplete documentation of this practice. Finally, we did not collect patient  
20  
21 455 identifiers, so inter-hospital transfers could be reported as two separate hospitalizations.  
22  
23 456 However, we did collect admission and discharge locations, and only 6% of the cohort  
24  
25 457 was transferred from another hospital.

26  
27  
28  
29  
30  
31 458 Our study also has strengths. Ours is the first multi-hospital study to examine  
32  
33 459 clinical aspects related to COVID-19 in Michigan. Through a rigorous data collection  
34  
35 460 structure including a well-defined sampling strategy and trained data abstractors, we  
36  
37 461 provide novel and detailed insights into clinical care during the pandemic. Second, we  
38  
39 462 were able to examine variation across sites finding substantial differences in clinical  
40  
41 463 care and outcomes across hospitals. To our knowledge, this is the first study to examine  
42  
43 464 differences in these important care processes, treatment approaches and outcomes  
44  
45 465 across sites. Third, we report a high rate of use of non-evidence-based therapies for  
46  
47 466 treating COVID-19. This finding has significant safety, economic and policy implications  
48  
49 467 for the most critically ill subsets in the hospital. Finally, data collection for this effort  
50  
51  
52  
53  
54  
55  
56  
57  
58  
59  
60



1  
2  
3 468 remains ongoing, including longitudinal monitoring of patients after discharge. These  
4  
5 469 data will help shed new light on the post hospital sequelae of COVID-19.  
6

7  
8 470 Michigan remains one of the regions most affected by COVID-19. This multi-  
9  
10 471 center study provides granular clinical data regarding patients, care practices and  
11  
12 472 clinical outcomes in the state. The wide variation in observed practices and outcomes  
13  
14 473 suggests caution when interpreting findings from single center studies. Our study also  
15  
16 474 demonstrates the value of hospital collaboratives to help inform best practices.  
17  
18

19 475

## 21 476 Ethics Statement

22  
23  
24 477 The study was deemed “not regulated” by the University of Michigan IRB (HUM  
25  
26 478 00179611).  
27

28 479

## 30 480 **BIBLIOGRAPHY**

- 31  
32  
33 481 1. Guan WJ, Ni ZY, Hu Y, et al. Clinical Characteristics of Coronavirus Disease 2019 in  
34  
35 482 China. *N Engl J Med* 2020 doi: 10.1056/NEJMoa2002032 [published Online First:  
36  
37 483 2020/02/29]  
38  
39  
40 484 2. Zhu N, Zhang D, Wang W, et al. A Novel Coronavirus from Patients with Pneumonia  
41  
42 485 in China, 2019. *N Engl J Med* 2020;382(8):727-33. doi:  
43  
44 486 10.1056/NEJMoa2001017 [published Online First: 2020/01/25]  
45  
46  
47 487 3. COVID-19 Dashboard by the Center for Systems Science and Engineering (CSSE) at  
48  
49 488 Johns Hopkins University. Available online at: <https://coronavirus.jhu.edu/maphtml>  
50  
51 489 Accessed April 20, 2020  
52  
53  
54  
55  
56  
57  
58  
59  
60

- 1  
2  
3 490 4. Centers for Disease Control Cases of Coronavirus Disease (COVID-19) in the US.  
4  
5 491 Available online at: [https://www.cdc.gov/coronavirus/2019-ncov/cases-  
7 updates/cases-in-us.html](https://www.cdc.gov/coronavirus/2019-ncov/cases-<br/>6 updates/cases-in-us.html). Accessed April 20, 2020.  
8 492  
9  
10 493 5. Michigan.gov. Coronavirus Resources - Confirmed cases by Jurisdiction. Available  
11  
12 494 online at: [https://www.michigan.gov/coronavirus/0,9753,7-406-98163-520743--  
14 .00.html](https://www.michigan.gov/coronavirus/0,9753,7-406-98163-520743--<br/>13 .00.html). Accessed April 20, 2020.  
15 495  
16  
17 496 6. Blue Cross Blue Shield Collaborative Quality Initiatives. Available online at:  
18  
19 497 [https://www.bcbsm.com/providers/value-partnerships/collaborative-quality-  
21 initiatives.html](https://www.bcbsm.com/providers/value-partnerships/collaborative-quality-<br/>20 initiatives.html). Accessed April 20, 2020.  
22 498  
23  
24 499 7. Goyal P, Choi JJ, Pinheiro LC, et al. Clinical Characteristics of Covid-19 in New York  
25  
26 500 City. *N Engl J Med* 2020 doi: 10.1056/NEJMc2010419 [published Online First:  
27  
28 501 2020/04/18]  
29  
30  
31 502 8. Bhatraju PK, Ghassemieh BJ, Nichols M, et al. Covid-19 in Critically Ill Patients in the  
32  
33 503 Seattle Region - Case Series. *N Engl J Med* 2020 doi: 10.1056/NEJMoa2004500  
34  
35 504 [published Online First: 2020/04/01]  
36  
37  
38 505 9. Myers LC, Parodi SM, Escobar GJ, et al. Characteristics of Hospitalized Adults With  
39  
40 506 COVID-19 in an Integrated Health Care System in California. *JAMA* 2020 doi:  
41  
42 507 10.1001/jama.2020.7202 [published Online First: 2020/04/25]  
43  
44  
45 508 10. Grasselli G, Zangrillo A, Zanella A, et al. Baseline Characteristics and Outcomes of  
46  
47 509 1591 Patients Infected With SARS-CoV-2 Admitted to ICUs of the Lombardy  
48  
49 510 Region, Italy. *JAMA* 2020 doi: 10.1001/jama.2020.5394 [published Online First:  
50  
51 511 2020/04/07]  
52  
53  
54  
55  
56  
57  
58  
59  
60

- 1  
2  
3 512 11. Xie J, Tong Z, Guan X, et al. Clinical Characteristics of Patients Who Died of  
4  
5 513 Coronavirus Disease 2019 in China. *JAMA Netw Open* 2020;3(4):e205619. doi:  
6  
7 514 10.1001/jamanetworkopen.2020.5619 [published Online First: 2020/04/11]  
8  
9  
10 515 12. Gold JAW, Wong KK, Szablewski CM, et al. Characteristics and Clinical Outcomes  
11  
12 516 of Adult Patients Hospitalized with COVID-19 - Georgia, March 2020. *MMWR*  
13  
14 517 *Morb Mortal Wkly Rep* 2020;69(18):545-50. doi: 10.15585/mmwr.mm6918e1  
15  
16 518 [published Online First: 2020/05/08]  
17  
18  
19 519 13. Bi Q, Wu Y, Mei S, et al. Epidemiology and transmission of COVID-19 in 391 cases  
20  
21 520 and 1286 of their close contacts in Shenzhen, China: a retrospective cohort  
22  
23 521 study. *Lancet Infect Dis* 2020 doi: 10.1016/S1473-3099(20)30287-5 [published  
24  
25 522 Online First: 2020/05/01]  
26  
27  
28 523 14. Sharfstein JM, Becker SJ, Mello MM. Diagnostic Testing for the Novel Coronavirus.  
29  
30 524 *JAMA* 2020 doi: 10.1001/jama.2020.3864 [published Online First: 2020/03/10]  
31  
32  
33 525 15. Richardson S, Hirsch JS, Narasimhan M, et al. Presenting Characteristics,  
34  
35 526 Comorbidities, and Outcomes Among 5700 Patients Hospitalized With COVID-19  
36  
37 527 in the New York City Area. *JAMA* 2020 doi: 10.1001/jama.2020.6775 [published  
38  
39 528 Online First: 2020/04/23]  
40  
41  
42 529 16. Bhimraj A, Morgan RL, Shumaker AH, et al. Infectious Diseases Society of America  
43  
44 530 Guidelines on the Treatment and Management of Patients with COVID-19. *Clin*  
45  
46 531 *Infect Dis* 2020 doi: 10.1093/cid/ciaa478 [published Online First: 2020/04/28]  
47  
48  
49 532 17. Rice TW, Janz DR. In Defense of Evidence-Based Medicine for the Treatment of  
50  
51 533 COVID-19 ARDS. *Ann Am Thorac Soc* 2020 doi: 10.1513/AnnalsATS.202004-  
52  
53 534 325IP [published Online First: 2020/04/23]  
54  
55  
56  
57  
58  
59  
60

- 1  
2  
3 535 18. Waterer GW, Rello J, Wunderink RG. SARS-CoV-2: First Do No Harm. *Am J Respir*  
4  
5 536 *Crit Care Med* 2020 doi: 10.1164/rccm.202004-1153ED [published Online First:  
6  
7 537 2020/04/21]
- 8  
9  
10 538 19. Tang W, Cao Z, Han M, et al. Hydroxychloroquine in patients with mainly mild to  
11  
12 539 moderate coronavirus disease 2019: open label, randomised controlled trial. *BMJ*  
13  
14 540 2020;369:m1849. doi: 10.1136/bmj.m1849 [published Online First: 2020/05/16]
- 15  
16  
17 541 20. Mahevas M, Tran VT, Roumier M, et al. Clinical efficacy of hydroxychloroquine in  
18  
19 542 patients with covid-19 pneumonia who require oxygen: observational  
20  
21 543 comparative study using routine care data. *BMJ* 2020;369:m1844. doi:  
22  
23 544 10.1136/bmj.m1844 [published Online First: 2020/05/16]
- 24  
25  
26 545 21. Rosenberg ES, Dufort EM, Udo T, et al. Association of Treatment With  
27  
28 546 Hydroxychloroquine or Azithromycin With In-Hospital Mortality in Patients With  
29  
30 547 COVID-19 in New York State. *JAMA* 2020 doi: 10.1001/jama.2020.8630  
31  
32 548 [published Online First: 2020/05/12]
- 33  
34  
35 549 22. Bessiere F, Rocchia H, Deliniere A, et al. Assessment of QT Intervals in a Case  
36  
37 550 Series of Patients With Coronavirus Disease 2019 (COVID-19) Infection Treated  
38  
39 551 With Hydroxychloroquine Alone or in Combination With Azithromycin in an  
40  
41 552 Intensive Care Unit. *JAMA Cardiol* 2020 doi: 10.1001/jamacardio.2020.1787  
42  
43 553 [published Online First: 2020/05/02]
- 44  
45  
46  
47 554 23. Angus DC. Optimizing the Trade-off Between Learning and Doing in a Pandemic.  
48  
49 555 *JAMA* 2020 doi: 10.1001/jama.2020.4984 [published Online First: 2020/04/01]  
50  
51  
52  
53  
54  
55  
56  
57  
58  
59  
60

- 1  
2  
3 556 24. Wells K. Hospitals Vary Treatment for Coronavirus Patients. *National Public Radio*  
4  
5 557 2020; Available online at: <https://www.npr.org/2020/05/18/857727140/hospitals->  
6  
7 [vary-treatment-for-coronavirus-patients](https://www.npr.org/2020/05/18/857727140/hospitals-vary-treatment-for-coronavirus-patients). Accessed May 19, 2020.  
8 558  
9  
10 559 25. Imam Z, Odish F, Gill I, et al. Older age and comorbidity are independent mortality  
11  
12 560 predictors in a large cohort of 1305 COVID-19 patients in Michigan, United  
13  
14 561 States. *J Intern Med* 2020;288(4):469-76. doi: 10.1111/joim.13119 [published  
15  
16 Online First: 2020/06/05]  
17 562  
18  
19 563 26. Kim L, Garg S, O'Halloran A, et al. Risk Factors for Intensive Care Unit Admission  
20  
21 564 and In-hospital Mortality Among Hospitalized Adults Identified through the US  
22  
23 565 Coronavirus Disease 2019 (COVID-19)-Associated Hospitalization Surveillance  
24  
25 Network (COVID-NET). *Clin Infect Dis* 2021;72(9):e206-e14. doi:  
26 566  
27 10.1093/cid/ciaa1012 [published Online First: 2020/07/17]  
28 567  
29  
30 568 27. Ko JY, Danielson ML, Town M, et al. Risk Factors for Coronavirus Disease 2019  
31  
32 569 (COVID-19)-Associated Hospitalization: COVID-19-Associated Hospitalization  
33  
34 570 Surveillance Network and Behavioral Risk Factor Surveillance System. *Clin*  
35  
36 571 *Infect Dis* 2021;72(11):e695-e703. doi: 10.1093/cid/ciaa1419 [published Online  
37  
38 572 First: 2020/09/19]  
39  
40  
41 573 28. Price-Haywood EG, Burton J, Fort D, et al. Hospitalization and Mortality among  
42  
43 574 Black Patients and White Patients with Covid-19. *N Engl J Med*  
44  
45 575 2020;382(26):2534-43. doi: 10.1056/NEJMsa2011686 [published Online First:  
46  
47 576 2020/05/28]  
48  
49  
50 577 29. Donnelly JP, Wang XQ, Iwashyna TJ, et al. Readmission and Death After Initial  
51  
52 578 Hospital Discharge Among Patients With COVID-19 in a Large Multihospital  
53  
54  
55  
56  
57  
58  
59  
60

- 1  
2  
3 579 System. *JAMA* 2021;325(3):304-06. doi: 10.1001/jama.2020.21465 [published  
4  
5 580 Online First: 2020/12/15]  
6  
7  
8 581 30. Mahase E. Covid-19: What do we know about "long covid"? *BMJ* 2020;370:m2815.  
9  
10 582 doi: 10.1136/bmj.m2815 [published Online First: 2020/07/16]  
11  
12 583 31. Richardson S, Hirsch JS, Narasimhan M, et al. Presenting Characteristics,  
13  
14 584 Comorbidities, and Outcomes Among 5700 Patients Hospitalized With COVID-19  
15  
16 585 in the New York City Area. *JAMA* 2020;323(20):2052-59. doi:  
17  
18 586 10.1001/jama.2020.6775 [published Online First: 2020/04/23]  
19  
20  
21 587 32. Bhatraju PK, Ghassemieh BJ, Nichols M, et al. Covid-19 in Critically Ill Patients in  
22  
23 588 the Seattle Region - Case Series. *N Engl J Med* 2020;382(21):2012-22. doi:  
24  
25 589 10.1056/NEJMoa2004500 [published Online First: 2020/04/01]  
26  
27  
28  
29  
30  
31 591

592 **Table 1. Demographic and Clinical Characteristics of COVID-19 Positive Patients**  
 593 **(n=1,024)**  
 594

|                                              |                                          |                  |
|----------------------------------------------|------------------------------------------|------------------|
| Residence prior to hospitalization - no. (%) |                                          |                  |
|                                              | Home                                     | 824 (80.5%)      |
|                                              | Congregated living facility <sup>1</sup> | 165 (16.1%)      |
|                                              | Sub-acute rehabilitation facility        | 9 (0.9%)         |
|                                              | Unknown                                  | 18 (1.8%)        |
| Admission location - no. (%)                 |                                          |                  |
|                                              | Emergency department                     | 951 (92.9%)      |
|                                              | Transfer from Another Hospital           | 60 (5.9%)        |
|                                              | Direct admission                         | 7 (0.7%)         |
| Median age (IQR) - yr                        |                                          | 63.3 (50.9-74.4) |
| Male Sex - no. (%)                           |                                          | 533 (52.1%)      |
| Race - no. (%)                               |                                          |                  |
|                                              | Black                                    | 526 (51.4%)      |
|                                              | White                                    | 390 (38.1%)      |
|                                              | Unknown                                  | 45 (4.4%)        |
|                                              | Asian                                    | 30 (2.9%)        |
|                                              | Other                                    | 26 (2.5%)        |
|                                              | Native                                   | 4 (0.4%)         |
|                                              | Islander                                 | 3 (0.3%)         |
| Ethnicity - no. (%)                          |                                          |                  |
|                                              | Non-Hispanic                             | 873 (85.3%)      |
|                                              | Hispanic                                 | 30 (2.9%)        |
|                                              | Unknown                                  | 117 (11.4%)      |
| Insurance – no. (%)                          |                                          |                  |
|                                              | Medicare                                 | 497 (48.5%)      |
|                                              | Commercial                               | 251 (24.5%)      |
|                                              | Medicaid                                 | 128 (12.5%)      |
|                                              | Self-pay                                 | 29 (2.8%)        |
|                                              | Other <sup>2</sup>                       | 117 (11.4%)      |
| BMI - median (IQR)                           |                                          | 30.6 (25.9-37.1) |
| Smoking history - no. (%)                    |                                          |                  |
|                                              | Never                                    | 615 (60.2%)      |
|                                              | Former                                   | 279 (27.3%)      |
|                                              | Current                                  | 61 (6.0%)        |
|                                              | Unknown                                  | 65 (6.4%)        |
| Vaping history - no. (%)                     |                                          |                  |
|                                              | Never                                    | 645 (63.2%)      |
|                                              | Former                                   | 366 (35.8%)      |
|                                              | Current                                  | 6 (0.6%)         |
|                                              | Unknown                                  | 3 (0.3%)         |
| Coexisting disorder - no. (%)                |                                          |                  |
|                                              | Hypertension                             | 670 (65.4%)      |
|                                              | Diabetes                                 | 377 (36.8%)      |
|                                              | Cardiovascular Disease                   | 266 (26.0%)      |
|                                              | Moderate/ Severe Kidney Disease          | 239 (23.3%)      |
|                                              | Asthma                                   | 132 (12.9%)      |
|                                              | CHF/Cardiomyopathy                       | 131 (12.8%)      |
|                                              | Dementia                                 | 123 (12.0%)      |
|                                              | Chronic Obstructive Pulmonary Disease    | 115 (11.2%)      |
|                                              | Cerebrovascular disease/ paraplegia      | 97 (9.5%)        |

|    |                                                            |             |
|----|------------------------------------------------------------|-------------|
| 1  |                                                            |             |
| 2  |                                                            |             |
| 3  | Cancer <sup>3</sup>                                        | 77 (7.5%)   |
| 4  | Peripheral Vascular Disorders                              | 41 (4.0%)   |
| 5  | Chronic Pulmonary Disease (non-asthma/COPD)                | 35 (3.4%)   |
| 6  | Rheumatoid Arthritis                                       | 29 (2.8%)   |
| 7  | Peptic Ulcer Disease                                       | 10 (1.0%)   |
| 8  | HIV/AIDS                                                   | 7 (0.7%)    |
| 9  | Organ transplant                                           | 8 (0.8%)    |
| 10 | Inflammatory Bowel Disease                                 | 8 (0.8%)    |
| 11 | No reported comorbidities                                  | 152 (14.9%) |
| 12 | Home Medications                                           |             |
| 13 | ACE Inhibitors                                             | 180 (17.6%) |
| 14 | Steroids/immunosuppressive therapy                         | 115 (11.3%) |
| 15 | ARBs                                                       | 136 (13.3%) |
| 16 | NSAIDs                                                     | 182 (17.8%) |
| 17 | Statins                                                    | 378 (37.0%) |
| 18 | Beta Blockers                                              | 298 (29.2%) |
| 19 | Anticoagulants                                             | 149 (14.6%) |
| 20 | Oral Steroids <sup>4</sup>                                 | 62 (6.1%)   |
| 21 | Inhaled steroids                                           | 43 (4.2%)   |
| 22 | Inhaled long-acting beta-agonist                           | 30 (2.9%)   |
| 23 | Inhaled long-acting anti-cholinergic                       | 5 (0.5%)    |
| 24 | Home oxygen therapy                                        | 36 (3.5%)   |
| 25 | Duration of symptoms before admission, days - median (IQR) | 6 (3-9)     |
| 26 | Respiratory symptoms - no. (%)                             |             |
| 27 | Cough (New or Worsening)                                   | 751 (73.3%) |
| 28 | Fever - no. (%)                                            | 735 (71.8%) |
| 29 | Fever (99.0 - 100.4 [F])                                   | 151 (14.7%) |
| 30 | Fever ( >100.4 [F])                                        | 390 (38.1%) |
| 31 | Subjective fever                                           | 194 (18.9%) |
| 32 | Dyspnea / shortness of breath                              | 739 (72.2%) |
| 33 | Nausea/vomiting or diarrhea                                | 403 (39.4%) |
| 34 | Fatigue                                                    | 361 (35.3%) |
| 35 | Myalgias                                                   | 264 (25.8%) |
| 36 | Weakness                                                   | 253 (24.7%) |
| 37 | Sputum production                                          | 146 (14.3%) |
| 38 | Altered Mental Status                                      | 144 (14.1%) |
| 39 | Non-pleuritic chest pain                                   | 100 (9.8%)  |
| 40 | Generalized malaise                                        | 91 (8.9%)   |
| 41 | Rhinorrhea                                                 | 75 (7.3%)   |
| 42 | Pleuritic chest pain                                       | 75 (7.3%)   |
| 43 | No reported symptoms                                       | 14 (1.4%)   |
| 44 | Sick contacts - no. (%)                                    | 381 (37.2%) |
| 45 | Known COVID-19 positive                                    | 244 (23.8%) |
| 46 | Unknown COVID-19 status                                    | 236 (23.0%) |
| 47 | Healthcare worker - no. (%)                                | 72 (7.0%)   |
| 48 | Service worker - no. (%) <sup>5</sup>                      | 59 (5.8%)   |
| 49 | Initial location of admission - no. (%)                    |             |
| 50 | General Medical/Surgical ward                              | 608 (59.5%) |
| 51 | ICU                                                        | 138 (13.5%) |
| 52 | Step-down unit                                             | 160 (15.7%) |
| 53 | Observation unit                                           | 115 (11.3%) |
| 54 | Missing/Unknown                                            | 3 (0.3%)    |
| 55 | Admitted to COVID-19 specific (i.e., cohorted) unit        | 419 (40.9%) |
| 56 |                                                            |             |
| 57 |                                                            |             |
| 58 |                                                            |             |
| 59 |                                                            |             |
| 60 |                                                            |             |



| <i>Advanced Directives on admission</i>                                                                                                                                                                                                                                                                                                                                                                                                                                                                                                                                                                                                                                                                                          |                        |           |
|----------------------------------------------------------------------------------------------------------------------------------------------------------------------------------------------------------------------------------------------------------------------------------------------------------------------------------------------------------------------------------------------------------------------------------------------------------------------------------------------------------------------------------------------------------------------------------------------------------------------------------------------------------------------------------------------------------------------------------|------------------------|-----------|
|                                                                                                                                                                                                                                                                                                                                                                                                                                                                                                                                                                                                                                                                                                                                  | DNR/DNI                | 64 (6.3%) |
|                                                                                                                                                                                                                                                                                                                                                                                                                                                                                                                                                                                                                                                                                                                                  | No CPR (intubation OK) | 19 (1.9%) |
|                                                                                                                                                                                                                                                                                                                                                                                                                                                                                                                                                                                                                                                                                                                                  | No intubation (CPR OK) | 3 (0.3%)  |
| <p>Abbreviations: COVID-19, coronavirus disease 2019; SE=standard error; IQR, inter-quartile range</p> <p><sup>1</sup> <i>Includes assisted living, group home, skilled nursing facility, and homeless shelters, correctional facilities, community living and inpatient psychiatric facilities.</i></p> <p><sup>2</sup> <i>Includes other payers, Michigan, out-of-state and government.</i></p> <p><sup>3</sup> <i>Includes leukemia, lymphoma, hematologic cancer and any malignancy.</i></p> <p><sup>4</sup> <i>Includes oral prednisone, prednisolone, hydrocortisone and dexamethasone.</i></p> <p><sup>5</sup> <i>Service workers include food service, transportation, postal/delivery and other related fields.</i></p> |                        |           |

16 595  
 17 596  
 18 597  
 19 598  
 20 599  
 21 600  
 22 601  
 23 602  
 24 603  
 25 604  
 26 605  
 27 606  
 28 607  
 29 608  
 30 609  
 31 610  
 32 611  
 33 612  
 34 613  
 35 614  
 36 615  
 37 616  
 38 617  
 39 618  
 40 619  
 41 620  
 42 621  
 43 622  
 44 623  
 45 624  
 46 625  
 47 626  
 48 627  
 49 628  
 50 629  
 51 630  
 52 631  
 53 632  
 54 633  
 55 634  
 56 635

636  
637  
638  
639  
640  
641  
642

**Table 2 – Clinical and Laboratory Data in COVID-19 Positive Patients by ICU-status (n=1,024)**

|                                                                     | Ever ICU<br>(n = 232) | General Ward<br>(n = 792) | p      |
|---------------------------------------------------------------------|-----------------------|---------------------------|--------|
| <b>Vital signs on day of hospital admission, no. (%)</b>            |                       |                           |        |
| Fever (>100.4 [F])                                                  | 95 (40.9%)            | 295 (37.2%)               | 0.3073 |
| Hypoxia / new or escalated O2 requirement                           | 142 (61.2%)           | 257 (32.4%)               | <.0001 |
| Supplemental oxygen use                                             | 96 (41.4%)            | 145 (18.3%)               | <.0001 |
| Respiratory rate > 20                                               | 139 (59.9%)           | 306 (38.6%)               | <.0001 |
| Heart rate > 100 per minute                                         | 99 (42.7%)            | 321 (40.5%)               | 0.5596 |
| Systolic blood pressure < 100 mmHg                                  | 27 (11.6%)            | 45 (5.7%)                 | 0.0018 |
| <b>Day 1 laboratory measures, median (IQR)</b>                      |                       |                           |        |
| Hemoglobin                                                          | 13.2 (11.4-14.7)      | 13.2 (12.0-14.6)          | 0.4573 |
| White blood cell count, K/uL                                        | 7.3 (5.5-9.7)         | 6.5 (4.8-8.4)             | <.0001 |
| Absolute lymphocyte count, K/uL                                     | 0.80 (0.60-1.20)      | 1.00 (0.70-1.30)          | 0.3440 |
| Platelet count, K/uL                                                | 197 (149-256)         | 204 (159-268)             | 0.4875 |
| ALT, IU/L                                                           | 32.0 (20.0-60.0)      | 27.0 (18.0-41.0)          | 0.2228 |
| Lactate, mmol/L                                                     | 1.6 (1.2-2.5)         | 1.4 (1.0-1.8)             | 0.0010 |
| Troponin pg/mL                                                      | 9 (0-38)              | 0 (0-12)                  | 0.5872 |
| Brain Natriuretic Peptide (BNP), pg/mL                              | 79 (34-236)           | 49 (18-157)               | 0.0088 |
| Procalcitonin, ng/mL                                                | 0.30 (0.17-0.94)      | 0.12 (0.06-0.29)          | 0.5054 |
| D-dimer, mg/L                                                       | 2.88 (1.19-35.00)     | 1.65 (0.59-368.00)        | 0.8240 |
| Ferritin, ng/mL                                                     | 872 (379-1531)        | 559 (237-1019)            | 0.1074 |
| CRP, mg/dL                                                          | 24.3 (12.0-107.1)     | 13.8 (5.8-66.2)           | 0.0031 |
| LDH, IU/L                                                           | 476 (337-668)         | 346 (254-455)             | <.0001 |
| Creatinine, mg/dL                                                   | 1.3 (1.0-2.0)         | 1.1 (0.8-1.5)             | 0.5736 |
| Total Bilirubin, mg/dL                                              | 0.6 (0.4-0.9)         | 0.5 (0.4-0.8)             | 0.7147 |
| Respiratory viral panel positive for non-COVID-19 respiratory virus | 2 (0.9%)              | 7 (0.9%)                  | 0.9443 |
| Positive blood culture within 1 day of admission                    | 7 (3.0%)              | 9 (1.1%)                  | 0.0422 |
| Positive respiratory culture within 1 day of admission              | 4 (1.7%)              | 4 (0.5%)                  | 0.0636 |
| Any Chest imaging <sup>1</sup>                                      | 139 (59.9%)           | 389 (49.1%)               | 0.0038 |
| Chest X-ray                                                         | 118 (50.9%)           | 322 (40.7%)               | 0.0058 |
| Chest Computed Tomography                                           | 34 (14.7%)            | 106 (13.4%)               | 0.6201 |
| <b>Imaging findings - no. (%)</b>                                   |                       |                           |        |
| Pneumonia                                                           | 61 (26.3%)            | 100 (12.6%)               | <.0001 |
| Non-specified opacities/air-space disease                           | 84 (36.2%)            | 161 (20.3%)               | <.0001 |
| Pleural effusion                                                    | 32 (13.8%)            | 37 (4.7%)                 | <.0001 |
| Normal/no abnormalities                                             | 5 (2.2%)              | 30 (3.8%)                 | 0.2287 |
| Pulmonary Edema                                                     | 25 (10.8%)            | 29 (3.7%)                 | <.0001 |
| CT with Ground Glass Infiltrates                                    | 14 (6.0%)             | 58 (7.3%)                 | 0.4995 |

| <b>Respiratory support on day of admission - no. (%)</b>                                                                                                                                                                                                                                                                                                                                     |                                             |             |             |        |
|----------------------------------------------------------------------------------------------------------------------------------------------------------------------------------------------------------------------------------------------------------------------------------------------------------------------------------------------------------------------------------------------|---------------------------------------------|-------------|-------------|--------|
|                                                                                                                                                                                                                                                                                                                                                                                              | Invasive mechanical ventilation             | 46 (19.8%)  | 2 (0.3%)    | <.0001 |
|                                                                                                                                                                                                                                                                                                                                                                                              | Non-invasive positive pressure              | 5 (2.2%)    | 2 (0.3%)    | 0.0020 |
|                                                                                                                                                                                                                                                                                                                                                                                              | HHFNC                                       | 5 (2.2%)    | 5 (2.2%)    | 0.1905 |
|                                                                                                                                                                                                                                                                                                                                                                                              | Oxygen mask (>40% <i>fio</i> <sub>2</sub> ) | 17 (7.3%)   | 20 (2.6%)   | 0.0006 |
|                                                                                                                                                                                                                                                                                                                                                                                              | Nasal cannula oxygen, 1-6L                  | 76 (32.8%)  | 261 (33.0%) | 0.9555 |
|                                                                                                                                                                                                                                                                                                                                                                                              | No supplemental oxygen                      | 83 (8.1%)   | 502 (49.0%) | <.0001 |
| <b>Treatments during hospitalization - no. (%)</b>                                                                                                                                                                                                                                                                                                                                           |                                             |             |             |        |
| <i>Covid-19 Specific treatment(s)</i>                                                                                                                                                                                                                                                                                                                                                        |                                             |             |             |        |
|                                                                                                                                                                                                                                                                                                                                                                                              | Hydroxychloroquine                          | 154 (66.4%) | 364 (46.0%) | <.0001 |
|                                                                                                                                                                                                                                                                                                                                                                                              | Hydroxychloroquine + Azithromycin           | 112 (48.3%) | 260 (32.8%) | <.0001 |
|                                                                                                                                                                                                                                                                                                                                                                                              | Vitamin C (PO or IV)                        | 35 (15.1%)  | 68 (8.6%)   | 0.0038 |
|                                                                                                                                                                                                                                                                                                                                                                                              | Remdesivir                                  | 7 (3.0%)    | 10 (1.3%)   | 0.0658 |
|                                                                                                                                                                                                                                                                                                                                                                                              | IL-6 receptor inhibitor                     | 27 (11.6%)  | . (.%)      | <.0001 |
|                                                                                                                                                                                                                                                                                                                                                                                              | <i>Corticosteroids</i> <sup>2</sup>         | 79 (34.1%)  | 143 (18.1%) | <.0001 |
|                                                                                                                                                                                                                                                                                                                                                                                              | <i>Antibiotics</i>                          | 213 (91.8%) | 558 (70.5%) | <.0001 |
|                                                                                                                                                                                                                                                                                                                                                                                              | Azithromycin                                | 149 (64.2%) | 415 (52.4%) | 0.0014 |
|                                                                                                                                                                                                                                                                                                                                                                                              | Ceftriaxone                                 | 124 (53.4%) | 345 (43.6%) | 0.0079 |
|                                                                                                                                                                                                                                                                                                                                                                                              | Cefepime                                    | 90 (38.8%)  | 79 (10.0%)  | <.0001 |
|                                                                                                                                                                                                                                                                                                                                                                                              | Doxycycline                                 | 37 (15.9%)  | 111 (14.0%) | 0.4615 |
|                                                                                                                                                                                                                                                                                                                                                                                              | Vancomycin                                  | 115 (49.6%) | 106 (13.4%) | <.0001 |
|                                                                                                                                                                                                                                                                                                                                                                                              | Linezolid                                   | 12 (5.2%)   | 8 (1.0%)    | <.0001 |
|                                                                                                                                                                                                                                                                                                                                                                                              | Anti-pseudomonals <sup>3</sup>              | 123 (53.0%) | 115 (14.5%) | <.0001 |
|                                                                                                                                                                                                                                                                                                                                                                                              | <i>Antivirals</i> <sup>4</sup>              | 1 (0.4%)    | 13 (1.6%)   | 0.1626 |
|                                                                                                                                                                                                                                                                                                                                                                                              | <i>Enrolled in clinical trial</i>           | 10 (4.3%)   | 12 (1.5%)   | 0.0098 |
| Abbreviations: COVID-19=coronavirus disease 2019; HHFNC=heated high flow nasal cannula; SE=standard error.                                                                                                                                                                                                                                                                                   |                                             |             |             |        |
| <sup>1</sup> Includes chest imaging results 7 days before hospital encounter<br><sup>2</sup> Hydrocortisone, Methylprednisolone, prednisolone or prednisone<br><sup>3</sup> Cefepime, gentamicin, imipenem, meropenem, piperacillin-tazobactam, ceftazadime, aztreonam or tobramycin<br><sup>4</sup> Non-remdesivir antivirals including Oseltamivir, Lopinavir/Ritonavir, Ribavirin, others |                                             |             |             |        |

643  
644  
645  
646  
647  
648  
649  
650  
651  
652  
653  
654  
655  
656

1  
2  
3 657  
4 658  
5 659  
6 660  
7 661

**Table 3. Organ support for COVID-19 Positive Patients by Discharge Status (n=1,024)**

|                                                                                                                                                                                                                                                                                                                                                                         | All patients<br>(n =1,024) | Discharged<br>Alive<br>n = 805 | Died in<br>Hospital<br>n = 219 |
|-------------------------------------------------------------------------------------------------------------------------------------------------------------------------------------------------------------------------------------------------------------------------------------------------------------------------------------------------------------------------|----------------------------|--------------------------------|--------------------------------|
| Treated in an ICU                                                                                                                                                                                                                                                                                                                                                       | 232 (22.7%)                | 101 (12.5%)                    | 131 (59.8%)                    |
| <i>Respiratory support ever received, no. (%)*</i>                                                                                                                                                                                                                                                                                                                      |                            |                                |                                |
| Invasive mechanical ventilation                                                                                                                                                                                                                                                                                                                                         | 161 (15.7%)                | 47 (5.8%)                      | 114 (52.1%)                    |
| Non-invasive positive pressure ventilation                                                                                                                                                                                                                                                                                                                              | 27 (2.6%)                  | 10 (1.2%)                      | 17 (7.8%)                      |
| HHFNC                                                                                                                                                                                                                                                                                                                                                                   | 90 (8.8%)                  | 57 (7.1%)                      | 33 (15.1%)                     |
| Oxygen mask (>40%FIO <sub>2</sub> )                                                                                                                                                                                                                                                                                                                                     | 159 (15.5%)                | 76 (9.4%)                      | 83 (37.9%)                     |
| <i>Maximum respiratory support received, no. (%)**</i>                                                                                                                                                                                                                                                                                                                  |                            |                                |                                |
| Invasive mechanical ventilation                                                                                                                                                                                                                                                                                                                                         | 161 (15.7%)                | 47 (5.8%)                      | 114 (52.1%)                    |
| Non-invasive positive pressure                                                                                                                                                                                                                                                                                                                                          | 15 (1.5%)                  | 6 (0.7%)                       | 9 (4.1%)                       |
| HHFNC                                                                                                                                                                                                                                                                                                                                                                   | 60 (5.9%)                  | 40 (5.0%)                      | 20 (9.1%)                      |
| Oxygen mask (>40%FIO <sub>2</sub> )                                                                                                                                                                                                                                                                                                                                     | 88 (8.6%)                  | 48 (6.0%)                      | 40 (18.3%)                     |
| Nasal canula oxygen, 1-6L/min                                                                                                                                                                                                                                                                                                                                           | 441 (43.1%)                | 415 (51.6%)                    | 26 (11.9%)                     |
| No respiratory support                                                                                                                                                                                                                                                                                                                                                  | 259 (25.3%)                | 249 (30.9%)                    | 10 (4.6%)                      |
| <i>Max FIO<sub>2</sub> received, no. (%)</i>                                                                                                                                                                                                                                                                                                                            |                            |                                |                                |
| 91-100%                                                                                                                                                                                                                                                                                                                                                                 | 126 (12.3%)                | 34 (4.2%)                      | 92 (42%)                       |
| 81-90%                                                                                                                                                                                                                                                                                                                                                                  | 30 (2.9%)                  | 13 (1.6%)                      | 17 (7.8%)                      |
| 71-80%                                                                                                                                                                                                                                                                                                                                                                  | 86 (8.4%)                  | 42 (5.2%)                      | 44 (20.1%)                     |
| 61-70%                                                                                                                                                                                                                                                                                                                                                                  | 16 (1.6%)                  | 9 (1.1%)                       | 7 (3.2%)                       |
| 51-60%                                                                                                                                                                                                                                                                                                                                                                  | 26 (2.5%)                  | 14 (1.7%)                      | 12 (5.5%)                      |
| 41-50%                                                                                                                                                                                                                                                                                                                                                                  | 24 (2.3%)                  | 20 (2.5%)                      | 4 (1.8%)                       |
| 31-40%                                                                                                                                                                                                                                                                                                                                                                  | 170 (16.6%)                | 144 (17.9%)                    | 26 (11.9%)                     |
| 21-30%                                                                                                                                                                                                                                                                                                                                                                  | 287 (28%)                  | 280 (34.8%)                    | 7 (3.2%)                       |
| <i>Non-respiratory organ support received, no. (%)</i>                                                                                                                                                                                                                                                                                                                  |                            |                                |                                |
| Vasopressor                                                                                                                                                                                                                                                                                                                                                             | 141 (13.8%)                | 35 (4.3%)                      | 106 (48.4%)                    |
| Any dialysis***                                                                                                                                                                                                                                                                                                                                                         | 53 (5.2%)                  | 17 (2.1%)                      | 36 (16.4%)                     |
| CRRT only                                                                                                                                                                                                                                                                                                                                                               | 17 (1.7%)                  | 1 (0.1%)                       | 16 (7.3%)                      |
| iHD only                                                                                                                                                                                                                                                                                                                                                                | 28 (2.7%)                  | 15 (1.9%)                      | 13 (5.9%)                      |
| CPR                                                                                                                                                                                                                                                                                                                                                                     | 41 (4.0%)                  | 1 (0.1%)                       | 40 (18.3%)                     |
| Abbreviations: SE=standard error; ECMO=extra-corporeal membrane oxygenation; HHFNC=heated high flow nasal cannula; FiO <sub>2</sub> =fraction of inspired oxygen; L= liters/min; ICU=intensive care unit; PE=pulmonary embolism; DVT=deep vein thrombosis; CPR=cardiopulmonary resuscitation; CRRT=continuous renal replacement therapy; iHD=intermittent hemodialysis; |                            |                                |                                |
| * Represents any use of respiratory support. Numbers are greater than 100% as one patient may have received multiple treatments.                                                                                                                                                                                                                                        |                            |                                |                                |
| ** Represents the highest level of respiratory support a patient received during hospitalization.                                                                                                                                                                                                                                                                       |                            |                                |                                |
| *** Includes Intermittent Hemodialysis (iHD), dialysis and ultrafiltration                                                                                                                                                                                                                                                                                              |                            |                                |                                |

51 662  
52 663  
53 664  
54 665  
55 666

1  
2  
3 667  
4 668  
5 669  
6 670  
7 671  
8 672  
9

**Table 4. Variation in Clinical Care and Outcomes in COVID-19 Positive Patients Across Hospitals**

|                                                          | Range across Hospitals |                       |                       |        |                       |                       |       | <i>p</i> <sup>†</sup> |
|----------------------------------------------------------|------------------------|-----------------------|-----------------------|--------|-----------------------|-----------------------|-------|-----------------------|
|                                                          | Min                    | 10 <sup>th</sup> Pctl | 25 <sup>th</sup> Pctl | Median | 75 <sup>th</sup> Pctl | 90 <sup>th</sup> Pctl | Max   |                       |
| Patient characteristics                                  |                        |                       |                       |        |                       |                       |       |                       |
| Age >65, %                                               | 30.2                   | 35.3                  | 39.6                  | 51.3   | 56.8                  | 64.4                  | 65.5  | <.0001                |
| Black, %                                                 | 0.0                    | 17.7                  | 29.7                  | 46.2   | 76.4                  | 93.7                  | 94.6  | <.0001                |
| Male, %                                                  | 39.2                   | 45.6                  | 47.1                  | 53.0   | 56.8                  | 72.4                  | 73.8  | 0.07                  |
| Charlson comorbidity index, median                       | 0.0                    | 1.0                   | 1.0                   | 1.0    | 1.0                   | 2.0                   | 2.0   | 0.01                  |
| BMI, median                                              | 24.3                   | 28.4                  | 29.5                  | 31.1   | 33.3                  | 36.5                  | 36.9  | 0.09                  |
| Age, median in years                                     | 39.0                   | 46.5                  | 60.8                  | 62.4   | 66.4                  | 73.5                  | 76.0  | <.0001                |
| Admission information, %                                 |                        |                       |                       |        |                       |                       |       |                       |
| Hospital-to-hospital transfer                            | 0.0                    | 0.0                   | 0.0                   | 0.00   | 2.8                   | 10.7                  | 20.9  | <.0001                |
| Admitted directly to ICU                                 | 0.0                    | 0.0                   | 2.9                   | 6.15   | 14.8                  | 20.5                  | 43.8  | <.0001                |
| Transferred from floor to ICU                            | 0.0                    | 0.0                   | 0.0                   | 8.4    | 17.6                  | 18.8                  | 24.1  | 0.09                  |
| Admitted to a Cohorted unit                              | 0.0                    | 2.1                   | 18.6                  | 67.9   | 85.71                 | 96.3                  | 97.1  | <.0001                |
| Severe illness on presentation <sup>2</sup>              | 0.0                    | 0.00                  | 0.00                  | 0.0    | 3.7                   | 7.1                   | 7.7   | 0.09                  |
| Vasopressor use on day 1                                 | 0.0                    | 0.00                  | 0.00                  | 2.1    | 6.4                   | 10.3                  | 14.8  | 0.04                  |
| Mechanical ventilation on day 1                          | 0.0                    | 0.00                  | 0.00                  | 2.51   | 8.6                   | 11.1                  | 12.8  | 0.03                  |
| Treatment, %                                             |                        |                       |                       |        |                       |                       |       |                       |
| Treated in a Cohorted Unit                               | 0.0                    | 0.00                  | 6.3                   | 57.1   | 90.9                  | 100.0                 | 100.0 | <.0001                |
| Treated in an ICU                                        | 4.2                    | 5.4                   | 14.0                  | 19.1   | 31.0                  | 38.5                  | 62.5  | <.0001                |
| COVID-19 Specific treatment                              | 32.4                   | 57.1                  | 69.2                  | 76.4   | 81.4                  | 90.2                  | 96.3  | <.0001                |
| Concurrent antibiotic and COVID-19 specific treatment(s) | 24.3                   | 42.9                  | 59.4                  | 69.8   | 76.7                  | 84.3                  | 96.3  | <.0001                |
| Hydroxychloroquine                                       | 13.5                   | 31.4                  | 42.3                  | 59.7   | 65.5                  | 81.5                  | 82.4  | <.0001                |
| Mechanical ventilation                                   | 2.1                    | 2.7                   | 6.4                   | 10.9   | 31.0                  | 38.5                  | 40.6  | <.0001                |
| Vasopressors                                             | 2.2                    | 2.9                   | 7.0                   | 12.1   | 25.0                  | 32.1                  | 32.5  | <.0001                |
| CPR before death                                         | 0.0                    | 0.0                   | 8.3                   | 14.3   | 33.3                  | 40.0                  | 66.7  | 0.0102                |
| Outcomes, %                                              |                        |                       |                       |        |                       |                       |       |                       |
| Days of mechanical ventilation, median <sup>3</sup>      | 1.0                    | 1.0                   | 1.0                   | 5.0    | 8.0                   | 8.0                   | 9.0   | 0.01                  |
| Length of stay, median                                   | 2.0                    | 3.0                   | 3.0                   | 4.5    | 6.0                   | 8.0                   | 8.5   | <.0001                |
| ICU length of stay, median <sup>4</sup>                  | 1.0                    | 2.0                   | 3.5                   | 5.0    | 6.5                   | 7.5                   | 9.5   | 0.01                  |
| DVT                                                      | 0.0                    | 0.0                   | 0.0                   | 0.0    | 2.1                   | 3.5                   | 7.1   | 0.05                  |
| VTE                                                      | 0.0                    | 0.0                   | 0.0                   | 2.9    | 5.2                   | 6.3                   | 10.7  | 0.20                  |
| PE                                                       | 0.0                    | 0.0                   | 0.0                   | 1.8    | 3.9                   | 6.3                   | 7.1   | 0.72                  |
| Discharge status, %                                      |                        |                       |                       |        |                       |                       |       |                       |
| Death                                                    | 7.9                    | 8.3                   | 14.6                  | 21.3   | 31.0                  | 41.4                  | 45.7  | <.0001                |
| Transferred to another hospital                          | 0.0                    | 0.0                   | 0.0                   | 0.0    | 1.6                   | 2.7                   | 5.1   | 0.07                  |

|                 |      |      |      |      |      |      |      |        |
|-----------------|------|------|------|------|------|------|------|--------|
| Discharged home | 42.3 | 48.2 | 62.1 | 67.5 | 72.9 | 80.0 | 82.5 | <.0001 |
|-----------------|------|------|------|------|------|------|------|--------|

<sup>1</sup> Differences across hospitals were tested using the Kruskal–Wallis test for continuous variables and Pearson chi-square test for categorical variables.

<sup>2</sup> Defined as admission to ICU on day 1 of hospitalization and treatment with both mechanical ventilation and vasopressors.

<sup>3</sup> For patients ever on mechanical ventilation

<sup>4</sup> For patients ever in ICU

\* Variables marked with asterisk represent variation from the demographic cohort

Abbreviations: BMI=body mass index; ICU=intensive care unit; CPR=cardiopulmonary resuscitation; DVT=deep vein thrombosis; VTE=venous thromboembolism; PE=pulmonary embolism

673  
674  
675  
676  
677  
678  
679  
680  
681  
682

1  
2  
3 **683 Figure Legend 1**

4 684  
5 685 *Legend. Figure depicts the proportion of the N=1024 patient cohort who are hospitalized on*  
6 686 *general care/ward (yellow), hospitalized in ICU (red), discharged alive (blue), transferred to a*  
7 687 *new hospital (light blue) and deceased over time to day 20 of hospital admission.*  
8 688

9  
10 **689 Figure Legend 2**

11 690  
12 691 *Legend. Graph depicts the proportion of the demographic cohort (n=1593) who died in hospital*  
13 692 *by decade of age. Black shading indicates death whereas blue shading indicates discharge*  
14 693 *alive.*  
15 694

16 695  
17 696  
18 697  
19 698  
20 699  
21 700  
22 701  
23 702  
24 703  
25 704  
26 705  
27 706  
28 707  
29 708  
30 709  
31 710  
32 711  
33 712  
34 713  
35 714  
36 715  
37 716  
38 717  
39 718  
40 719  
41 720  
42  
43  
44  
45  
46  
47  
48  
49  
50  
51  
52  
53  
54  
55  
56  
57  
58  
59  
60

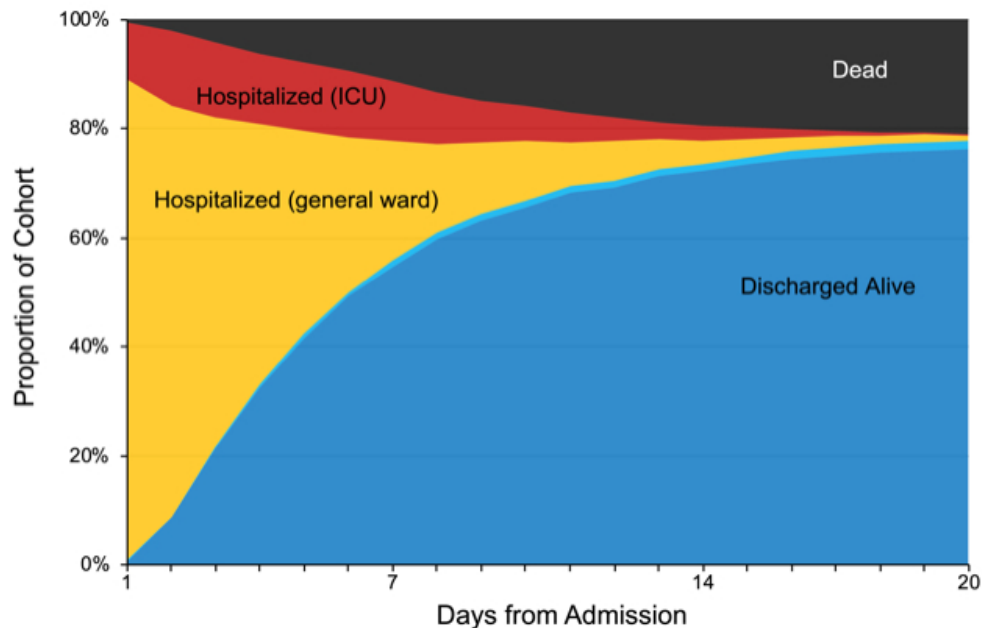

Caption : Figure 1. Proportion of COVID-19 Positive Patients in hospital, ICU, dead, and discharged over time (n=1,024). Legend. Figure depicts the proportion of the N=1024 patient cohort who are hospitalized on general care/ward (yellow), hospitalized in ICU (red), discharged alive (blue), transferred to a new hospital (light blue) and deceased over time to day 20 of hospital admission.

27x17mm (600 x 600 DPI)



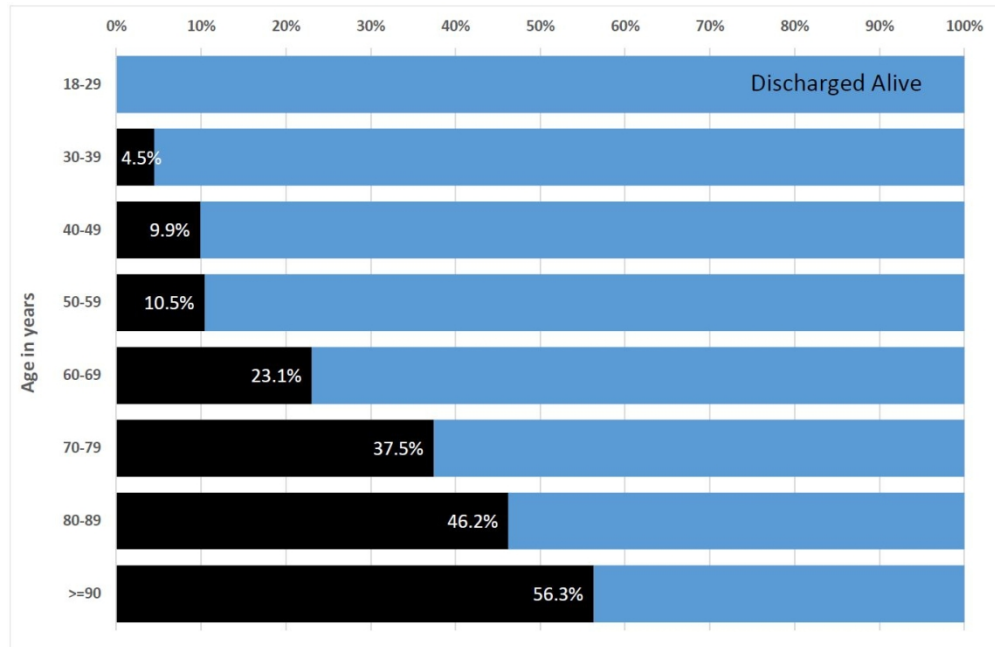

Caption : Figure 2. Mortality rate for COVID-19 positive patients by decade of age (demographic data cohort, n=1,593) Legend. Graph depicts the proportion of the demographic cohort (n=1593) who died in hospital by decade of age. Black shading indicates death whereas blue shading indicates discharge alive.

116x75mm (300 x 300 DPI)

## MI-COVID19 Sites

| Hospital    | Bed Size <sup>1</sup> | Total Patient Discharges <sup>2</sup> | Teaching Hospital Status | Ownership Status <sup>3</sup>  | Location <sup>4</sup> |
|-------------|-----------------------|---------------------------------------|--------------------------|--------------------------------|-----------------------|
| Hospital 1  | 632                   | 30354                                 | Yes                      | Voluntary non-profit - Private | Metropolitan          |
| Hospital 2  | 330                   | 13159                                 | Yes                      | Voluntary non-profit - Private | Metropolitan          |
| Hospital 3  | 250                   | 12186                                 | Yes                      | Voluntary non-profit - Private | Metropolitan          |
| Hospital 4  | 1070                  | 61758                                 | Yes                      | Voluntary non-profit - Private | Metropolitan          |
| Hospital 5  | 189                   | 6142                                  | Yes                      | Voluntary non-profit - Private | Metropolitan          |
| Hospital 6  | 193                   | 9816                                  | Yes                      | Voluntary non-profit - Private | Metropolitan          |
| Hospital 7  | 458                   | 34863                                 | Yes                      | Voluntary non-profit - Private | Metropolitan          |
| Hospital 8  | 215                   | 7797                                  | Yes                      | Voluntary non-profit - Private | Metropolitan          |
| Hospital 9  | 179                   | 7254                                  | No                       | Proprietary                    | Metropolitan          |
| Hospital 10 | 434                   | 26705                                 | Yes                      | Voluntary non-profit - Private | Metropolitan          |
| Hospital 11 | 273                   | 10815                                 | Yes                      | Proprietary                    | Metropolitan          |
| Hospital 12 | 584                   | 19882                                 | Yes                      | Proprietary                    | Metropolitan          |
| Hospital 13 | 189                   | 8639                                  | No                       | Voluntary non-profit - Private | Metropolitan          |
| Hospital 14 | 443                   | 17240                                 | Yes                      | Voluntary non-profit - Other   | Metropolitan          |
| Hospital 15 | 158                   | 7704                                  | Yes                      | Proprietary                    | Metropolitan          |
| Hospital 16 | 317                   | 15093                                 | Yes                      | Voluntary non-profit - Private | Metropolitan          |
| Hospital 17 | 378                   | 17969                                 | Yes                      | Voluntary non-profit - Private | Metropolitan          |

1  
2  
3  
4  
5  
6  
7  
8  
9  
10  
11  
12  
13  
14  
15  
16  
17  
18  
19  
20  
21  
22  
23  
24  
25  
26  
27  
28  
29  
30  
31  
32  
33  
34  
35  
36  
37  
38  
39  
40  
41  
42  
43  
44  
45  
46  
47

| Hospital    | Bed Size <sup>1</sup> | Total Patient Discharges <sup>2</sup> | Teaching Hospital Status | Ownership Status <sup>3</sup>  | Location <sup>4</sup> |
|-------------|-----------------------|---------------------------------------|--------------------------|--------------------------------|-----------------------|
| Hospital 18 | 196                   | 9307                                  | No                       | Voluntary non-profit - Private | Metropolitan          |
| Hospital 19 | 283                   | 15855                                 | Yes                      | Voluntary non-profit - Church  | Metropolitan          |
| Hospital 20 | 208                   | 10476                                 | Yes                      | Voluntary non-profit - Private | Metropolitan          |
| Hospital 21 | 1059                  | 44920                                 | Yes                      | Voluntary non-profit - Private | Metropolitan          |
| Hospital 22 | 139                   | 4362                                  | No                       | Proprietary                    | Micropolitan          |
| Hospital 23 | 79                    | 3349                                  | Yes                      | Voluntary non-profit - Private | Micropolitan          |
| Hospital 24 | 328                   | 15767                                 | Yes                      | Voluntary non-profit - Other   | Metropolitan          |
| Hospital 25 | 391                   | 21759                                 | Yes                      | Voluntary non-profit - Other   | Micropolitan          |
| Hospital 26 | 537                   | 30614                                 | Yes                      | Voluntary non-profit - Church  | Metropolitan          |
| Hospital 27 | 133                   | 3763                                  | No                       | Voluntary non-profit - Private | Metropolitan          |
| Hospital 28 | 136                   | 2767                                  | Yes                      | Voluntary non-profit - Other   | Metropolitan          |
| Hospital 29 | 443                   | 19102                                 | Yes                      | Voluntary non-profit - Private | Metropolitan          |
| Hospital 30 | 304                   | 15804                                 | Yes                      | Voluntary non-profit - Private | Metropolitan          |
| Hospital 31 | 404                   | 18345                                 | Yes                      | Proprietary                    | Metropolitan          |
| Hospital 32 | 109                   | 32636                                 | Yes                      | Voluntary non-profit - Other   | Metropolitan          |

<sup>1</sup>Data obtained from 2015 Michigan Certificate of Need Annual Survey, Basic Total Licensed Beds Utilization Statistics. Retrieved 3/21/2017 from [http://www.michigan.gov/documents/mdhhs/Report\\_011 - Licensed Beds in Hospitals by County 538170 7.pdf](http://www.michigan.gov/documents/mdhhs/Report_011_-_Licensed_Beds_in_Hospitals_by_County_538170_7.pdf)

<sup>2</sup>Data obtained from American Hospital Directory, Inc.'s *Individual Hospital Statistics for Michigan*. Retrieved 6/1/2020 from [https://www.ahd.com/states/hospital MI.html](https://www.ahd.com/states/hospital_MI.html)

1  
2  
3 <sup>3</sup>Data obtained from data.medicare.gov; Hospital General Information. Retrieved from 06/03/2020 from [https://data.cms.gov/provider-](https://data.cms.gov/provider-data/dataset/xubh-q36u)  
4 [data/dataset/xubh-q36u](https://data.cms.gov/provider-data/dataset/xubh-q36u)

5 <sup>4</sup>Data obtained from [https://www2.census.gov/geo/maps/metroarea/stcbsa\\_pg/Feb2013/cbsa2013\\_MI.pdf](https://www2.census.gov/geo/maps/metroarea/stcbsa_pg/Feb2013/cbsa2013_MI.pdf)  
6

7  
8 \* The American Hospital Directory reports data for Ascension Providence Hospital, Novi Campus and Ascension Providence  
9 Hospital, Southfield Campus together, so individual discharge numbers and teaching status for these two sites was not available.  
10 The data presented in this table represents numbers for both of these sites combined.  
11  
12  
13  
14  
15  
16  
17  
18  
19  
20  
21  
22  
23  
24  
25  
26  
27  
28  
29  
30  
31  
32  
33  
34  
35  
36  
37  
38  
39  
40  
41  
42  
43  
44  
45  
46  
47

For peer review only

**Appendix: Availability of Laboratory Tests**

| Variable                        | N   | % missing |
|---------------------------------|-----|-----------|
| Hemoglobin (Hgb)                | 959 | 6.3%      |
| WBC *                           | 959 | 6.3%      |
| Absolute Lymphocyte Count *     | 776 | 24.2%     |
| Platelet                        | 957 | 6.5%      |
| ALT *                           | 803 | 21.6%     |
| Lactate                         | 586 | 42.8%     |
| Troponin                        | 588 | 42.6%     |
| Brain Natriuretic Peptide (BNP) | 282 | 72.5%     |
| Procalcitonin                   | 434 | 57.6%     |
| D-dimer                         | 333 | 67.5%     |
| Ferritin *                      | 419 | 59.1%     |
| CRP *                           | 460 | 55.1%     |
| Lactic Acid Dehydrogenase (LDH) | 392 | 61.7%     |
| pH* (imputed)                   | 326 | 68.2%     |
| Creatinine *                    | 956 | 6.6%      |
| Total Bilirubin                 | 777 | 24.1%     |

## STROBE (Strengthening The Reporting of OBServational Studies in Epidemiology) Checklist

A checklist of items that should be included in reports of observational studies. You must report the page number in your manuscript where you consider each of the items listed in this checklist. If you have not included this information, either revise your manuscript accordingly before submitting or note N/A.

**Note:** An Explanation and Elaboration article discusses each checklist item and gives methodological background and published examples of transparent reporting. The STROBE checklist is best used in conjunction with this article (freely available on the Web sites of PLoS Medicine at <http://www.plosmedicine.org/>, Annals of Internal Medicine at <http://www.annals.org/>, and Epidemiology at <http://www.epidem.com/>). Information on the STROBE Initiative is available at [www.strobe-statement.org](http://www.strobe-statement.org).

| Section and Item     | Item No. | Recommendation                                                                                                                                                                                                                                                                                                                                                                                                                                                                 | Reported on Page No. |
|----------------------|----------|--------------------------------------------------------------------------------------------------------------------------------------------------------------------------------------------------------------------------------------------------------------------------------------------------------------------------------------------------------------------------------------------------------------------------------------------------------------------------------|----------------------|
| Title and Abstract   | 1        | (a) Indicate the study's design with a commonly used term in the title or the abstract                                                                                                                                                                                                                                                                                                                                                                                         |                      |
|                      |          | (b) Provide in the abstract an informative and balanced summary of what was done and what was found                                                                                                                                                                                                                                                                                                                                                                            |                      |
| <b>Introduction</b>  |          |                                                                                                                                                                                                                                                                                                                                                                                                                                                                                |                      |
| Background/Rationale | 2        | Explain the scientific background and rationale for the investigation being reported                                                                                                                                                                                                                                                                                                                                                                                           |                      |
| Objectives           | 3        | State specific objectives, including any prespecified hypotheses                                                                                                                                                                                                                                                                                                                                                                                                               |                      |
| <b>Methods</b>       |          |                                                                                                                                                                                                                                                                                                                                                                                                                                                                                |                      |
| Study Design         | 4        | Present key elements of study design early in the paper                                                                                                                                                                                                                                                                                                                                                                                                                        |                      |
| Setting              | 5        | Describe the setting, locations, and relevant dates, including periods of recruitment, exposure, follow-up, and data collection                                                                                                                                                                                                                                                                                                                                                |                      |
| Participants         | 6        | (a) <i>Cohort study</i> —Give the eligibility criteria, and the sources and methods of selection of participants. Describe methods of follow-up<br><br><i>Case-control study</i> —Give the eligibility criteria, and the sources and methods of case ascertainment and control selection. Give the rationale for the choice of cases and controls<br><br><i>Cross-sectional study</i> —Give the eligibility criteria, and the sources and methods of selection of participants |                      |
|                      |          | (b) <i>Cohort study</i> —For matched studies, give matching criteria and number of exposed and unexposed<br><br><i>Case-control study</i> —For matched studies, give matching criteria and the number of controls per case                                                                                                                                                                                                                                                     |                      |
| Variables            | 7        | Clearly define all outcomes, exposures, predictors, potential confounders, and effect modifiers. Give diagnostic criteria, if applicable                                                                                                                                                                                                                                                                                                                                       |                      |

| Section and Item             | Item No. | Recommendation                                                                                                                                                                                                                                                                                                    | Reported on Page No. |
|------------------------------|----------|-------------------------------------------------------------------------------------------------------------------------------------------------------------------------------------------------------------------------------------------------------------------------------------------------------------------|----------------------|
| Data Sources/<br>Measurement | 8*       | For each variable of interest, give sources of data and details of methods of assessment (measurement). Describe comparability of assessment methods if there is more than one group                                                                                                                              |                      |
| Bias                         | 9        | Describe any efforts to address potential sources of bias                                                                                                                                                                                                                                                         |                      |
| Study Size                   | 10       | Explain how the study size was arrived at                                                                                                                                                                                                                                                                         |                      |
| Quantitative Variables       | 11       | Explain how quantitative variables were handled in the analyses. If applicable, describe which groupings were chosen and why                                                                                                                                                                                      |                      |
| Statistical Methods          | 12       | (a) Describe all statistical methods, including those used to control for confounding                                                                                                                                                                                                                             |                      |
|                              |          | (b) Describe any methods used to examine subgroups and interactions                                                                                                                                                                                                                                               |                      |
|                              |          | (c) Explain how missing data were addressed                                                                                                                                                                                                                                                                       |                      |
|                              |          | (d) <i>Cohort study</i> —If applicable, explain how loss to follow-up was addressed<br><br><i>Case-control study</i> —If applicable, explain how matching of cases and controls was addressed<br><br><i>Cross-sectional study</i> —If applicable, describe analytical methods taking account of sampling strategy |                      |
|                              |          | (e) Describe any sensitivity analyses                                                                                                                                                                                                                                                                             |                      |
| <b>Results</b>               |          |                                                                                                                                                                                                                                                                                                                   |                      |
| Participants                 | 13*      | (a) Report numbers of individuals at each stage of study—eg numbers potentially eligible, examined for eligibility, confirmed eligible, included in the study, completing follow-up, and analysed                                                                                                                 |                      |
|                              |          | (b) Give reasons for non-participation at each stage                                                                                                                                                                                                                                                              |                      |
|                              |          | (c) Consider use of a flow diagram                                                                                                                                                                                                                                                                                |                      |
| Descriptive Data             | 14*      | (a) Give characteristics of study participants (eg demographic, clinical, social) and information on exposures and potential confounders                                                                                                                                                                          |                      |
|                              |          | (b) Indicate number of participants with missing data for each variable of interest                                                                                                                                                                                                                               |                      |
|                              |          | (c) <i>Cohort study</i> —Summarise follow-up time (eg, average and total amount)                                                                                                                                                                                                                                  |                      |
| Outcome Data                 | 15*      | <i>Cohort study</i> —Report numbers of outcome events or summary measures over time                                                                                                                                                                                                                               |                      |
|                              |          | <i>Case-control study</i> —Report numbers in each exposure category, or summary measures of exposure                                                                                                                                                                                                              |                      |
|                              |          | <i>Cross-sectional study</i> —Report numbers of outcome events or summary measures                                                                                                                                                                                                                                |                      |

| Section and Item         | Item No. | Recommendation                                                                                                                                                                                               | Reported on Page No. |
|--------------------------|----------|--------------------------------------------------------------------------------------------------------------------------------------------------------------------------------------------------------------|----------------------|
| Main Results             | 16       | (a) Give unadjusted estimates and, if applicable, confounder-adjusted estimates and their precision (eg, 95% confidence interval). Make clear which confounders were adjusted for and why they were included |                      |
|                          |          | (b) Report category boundaries when continuous variables were categorized                                                                                                                                    |                      |
|                          |          | (c) If relevant, consider translating estimates of relative risk into absolute risk for a meaningful time period                                                                                             |                      |
| Other Analyses           | 17       | Report other analyses done—eg analyses of subgroups and interactions, and sensitivity analyses                                                                                                               |                      |
| <b>Discussion</b>        |          |                                                                                                                                                                                                              |                      |
| Key Results              | 18       | Summarise key results with reference to study objectives                                                                                                                                                     |                      |
| Limitations              | 19       | Discuss limitations of the study, taking into account sources of potential bias or imprecision. Discuss both direction and magnitude of any potential bias                                                   |                      |
| Interpretation           | 20       | Give a cautious overall interpretation of results considering objectives, limitations, multiplicity of analyses, results from similar studies, and other relevant evidence                                   |                      |
| Generalisability         | 21       | Discuss the generalisability (external validity) of the study results                                                                                                                                        |                      |
| <b>Other Information</b> |          |                                                                                                                                                                                                              |                      |
| Funding                  | 22       | Give the source of funding and the role of the funders for the present study and, if applicable, for the original study on which the present article is based                                                |                      |

\*Give information separately for cases and controls in case-control studies and, if applicable, for exposed and unexposed groups in cohort and cross-sectional studies.

**Once you have completed this checklist, please save a copy and upload it as part of your submission. DO NOT include this checklist as part of the main manuscript document. It must be uploaded as a separate file.**
