# Supplementary material for: Variation in COVID-19 characteristics, treatment and outcomes in Michigan: an observational study in 32 hospitals
Source: PubMed Central journal article supplement — BMJ Open. 2021 Jul 23;11(7):e044921. doi: 10.1136/bmjopen-2020-044921 (PMC8313307; doi:10.1136/bmjopen-2020-044921), 2021-07-23
Supplement: bmjopen-2020-044921supp001.pdf [file bmjopen-2020-044921supp001.pdf]

## MI-COVID19 Sites

| Hospital    | Bed Size <sup>1</sup> | Total Patient Discharges <sup>2</sup> | Teaching Hospital Status | Ownership Status <sup>3</sup>  | Location <sup>4</sup> |
|-------------|-----------------------|---------------------------------------|--------------------------|--------------------------------|-----------------------|
| Hospital 1  | 632                   | 30354                                 | Yes                      | Voluntary non-profit - Private | Metropolitan          |
| Hospital 2  | 330                   | 13159                                 | Yes                      | Voluntary non-profit - Private | Metropolitan          |
| Hospital 3  | 250                   | 12186                                 | Yes                      | Voluntary non-profit - Private | Metropolitan          |
| Hospital 4  | 1070                  | 61758                                 | Yes                      | Voluntary non-profit - Private | Metropolitan          |
| Hospital 5  | 189                   | 6142                                  | Yes                      | Voluntary non-profit - Private | Metropolitan          |
| Hospital 6  | 193                   | 9816                                  | Yes                      | Voluntary non-profit - Private | Metropolitan          |
| Hospital 7  | 458                   | 34863                                 | Yes                      | Voluntary non-profit - Private | Metropolitan          |
| Hospital 8  | 215                   | 7797                                  | Yes                      | Voluntary non-profit - Private | Metropolitan          |
| Hospital 9  | 179                   | 7254                                  | No                       | Proprietary                    | Metropolitan          |
| Hospital 10 | 434                   | 26705                                 | Yes                      | Voluntary non-profit - Private | Metropolitan          |
| Hospital 11 | 273                   | 10815                                 | Yes                      | Proprietary                    | Metropolitan          |
| Hospital 12 | 584                   | 19882                                 | Yes                      | Proprietary                    | Metropolitan          |
| Hospital 13 | 189                   | 8639                                  | No                       | Voluntary non-profit - Private | Metropolitan          |
| Hospital 14 | 443                   | 17240                                 | Yes                      | Voluntary non-profit - Other   | Metropolitan          |
| Hospital 15 | 158                   | 7704                                  | Yes                      | Proprietary                    | Metropolitan          |
| Hospital 16 | 317                   | 15093                                 | Yes                      | Voluntary non-profit - Private | Metropolitan          |
| Hospital 17 | 378                   | 17969                                 | Yes                      | Voluntary non-profit - Private | Metropolitan          |

| Hospital    | Bed Size <sup>1</sup> | Total Patient Discharges <sup>2</sup> | Teaching Hospital Status | Ownership Status <sup>3</sup>  | Location <sup>4</sup> |
|-------------|-----------------------|---------------------------------------|--------------------------|--------------------------------|-----------------------|
| Hospital 18 | 196                   | 9307                                  | No                       | Voluntary non-profit - Private | Metropolitan          |
| Hospital 19 | 283                   | 15855                                 | Yes                      | Voluntary non-profit - Church  | Metropolitan          |
| Hospital 20 | 208                   | 10476                                 | Yes                      | Voluntary non-profit - Private | Metropolitan          |
| Hospital 21 | 1059                  | 44920                                 | Yes                      | Voluntary non-profit - Private | Metropolitan          |
| Hospital 22 | 139                   | 4362                                  | No                       | Proprietary                    | Micropolitan          |
| Hospital 23 | 79                    | 3349                                  | Yes                      | Voluntary non-profit - Private | Micropolitan          |
| Hospital 24 | 328                   | 15767                                 | Yes                      | Voluntary non-profit - Other   | Metropolitan          |
| Hospital 25 | 391                   | 21759                                 | Yes                      | Voluntary non-profit - Other   | Micropolitan          |
| Hospital 26 | 537                   | 30614                                 | Yes                      | Voluntary non-profit - Church  | Metropolitan          |
| Hospital 27 | 133                   | 3763                                  | No                       | Voluntary non-profit - Private | Metropolitan          |
| Hospital 28 | 136                   | 2767                                  | Yes                      | Voluntary non-profit - Other   | Metropolitan          |
| Hospital 29 | 443                   | 19102                                 | Yes                      | Voluntary non-profit - Private | Metropolitan          |
| Hospital 30 | 304                   | 15804                                 | Yes                      | Voluntary non-profit - Private | Metropolitan          |
| Hospital 31 | 404                   | 18345                                 | Yes                      | Proprietary                    | Metropolitan          |
| Hospital 32 | 109                   | 32636                                 | Yes                      | Voluntary non-profit - Other   | Metropolitan          |

<sup>1</sup>Data obtained from 2015 Michigan Certificate of Need Annual Survey, Basic Total Licensed Beds Utilization Statistics. Retrieved 3/21/2017 from [http://www.michigan.gov/documents/mdhhs/Report\\_011 - Licensed Beds in Hospitals by County 538170 7.pdf](http://www.michigan.gov/documents/mdhhs/Report_011_-_Licensed_Beds_in_Hospitals_by_County_538170_7.pdf)

<sup>2</sup>Data obtained from American Hospital Directory, Inc.'s *Individual Hospital Statistics for Michigan*. Retrieved 6/1/2020 from [https://www.ahd.com/states/hospital\\_MI.html](https://www.ahd.com/states/hospital_MI.html)

<sup>3</sup>Data obtained from data.medicare.gov; Hospital General Information. Retrieved from 06/03/2020 from <https://data.cms.gov/provider-data/dataset/xubh-q36u>

<sup>4</sup>Data obtained from [https://www2.census.gov/geo/maps/metroarea/stcbsa\\_pg/Feb2013/cbsa2013\\_MI.pdf](https://www2.census.gov/geo/maps/metroarea/stcbsa_pg/Feb2013/cbsa2013_MI.pdf)

\* The American Hospital Directory reports data for Ascension Providence Hospital, Novi Campus and Ascension Providence Hospital, Southfield Campus together, so individual discharge numbers and teaching status for these two sites was not available. The data presented in this table represents numbers for both of these sites combined.
