# Supplementary material for: Variation in COVID-19 characteristics, treatment and outcomes in Michigan: an observational study in 32 hospitals
Source: PubMed Central journal article supplement — BMJ Open. 2021 Jul 23;11(7):e044921. doi: 10.1136/bmjopen-2020-044921 (PMC8313307; doi:10.1136/bmjopen-2020-044921), 2021-07-23
Supplement: bmjopen-2020-044921supp002.pdf [file bmjopen-2020-044921supp002.pdf]

**Appendix: Availability of Laboratory Tests**

| Variable                        | N   | % missing |
|---------------------------------|-----|-----------|
| Hemoglobin (Hgb)                | 959 | 6.3%      |
| WBC *                           | 959 | 6.3%      |
| Absolute Lymphocyte Count *     | 776 | 24.2%     |
| Platelet                        | 957 | 6.5%      |
| ALT *                           | 803 | 21.6%     |
| Lactate                         | 586 | 42.8%     |
| Troponin                        | 588 | 42.6%     |
| Brain Natriuretic Peptide (BNP) | 282 | 72.5%     |
| Procalcitonin                   | 434 | 57.6%     |
| D-dimer                         | 333 | 67.5%     |
| Ferritin *                      | 419 | 59.1%     |
| CRP *                           | 460 | 55.1%     |
| Lactic Acid Dehydrogenase (LDH) | 392 | 61.7%     |
| pH* (imputed)                   | 326 | 68.2%     |
| Creatinine *                    | 956 | 6.6%      |
| Total Bilirubin                 | 777 | 24.1%     |
